# Supplementary material for: Biomarkers of Exposure and Effect in the Lungs of Smokers, Nonsmokers, and Electronic Cigarette Users
Source: Oxford University Press journal article supplement (doi:10.1158/1055-9965.epi-19-1245), 2019-12-17
Supplement: 10559965epi191245-sup-230294_2_supp_5915193_q1bvt4.xlsx [file 10559965epi191245-sup-230294_2_supp_5915193_q1bvt4.xlsx]

## Sheet: Sheet1
Supplementary Table 1. Demography, smoking/e-cig history, and THC testing results of individual e-cig subjects
E-cig users	Gender	Age	THC*	lifetime smoking ≥100 cigarettes	Years smoking	Cigarettes per day	Time since last cigarette (Years Months Days)	Years of E-cig use	Puffs per day	E-liquid (mL) per day	Nicotine concentration mg/mL	Flavors in the past 3 months	Favorite flavor	Current Flavors	Device Brand
1	Male	21	no data	no	0	0	0	0.5	200	10	3	Menthol or mint, Fruit, Chocolate, Candy or other sweets	Fruit	Blackberry	Smok
2	Male	29	Neg	no	0	0	0	2	80	4	18	Fruit	Fruit	Fruit	unknown
3	Female	28	Neg	no	0	0	0	1	100	9	12	Fruit, Chocolate, Alcoholic drink such as wine, congnac, margarita, pina colada, peach, schnapps, or other cocktails, Candy or other sweets, Tobacco, Coffee, Vanilla	Coffee	Chocolate and Coffee	Smok
4	Male	22	Pos	yes	not provided	not provided	1 Years 0 Months 27 Days	4	600	20	3	Fruit, Candy or other sweets, Vanilla	Candy	Candy	not provided
5	Male	25	Neg	yes	7	8	not provided	2	50	10	3	Fruit, Candy or other sweets, Vanilla	Vanilla	Vanilla	Jaybo
6	Female	27	Neg	yes	9	20	not provided	2	100	5	6	Menthol or mint, Fruit, Candy or other sweets, Tobacco, Coffee, Vanilla	Fruit	Fruit-Watermelon	Smok pro color
7	Male	29	Neg	yes	1	20	1 Years 7 Months 5 Days	3	25	not provided	12	Menthol or mint, Clove or spice, Fruit	Fruit	Fruit/ cherry and apple	Mermaid sub-ohm tank
8	Male	27	Neg	yes	10	0.7	4 Years 1 Months 17 Days	4	200	6	24	Fruit, candy or other sweets, some other flavor- Sunshine/ Huckle berry	Sunshine/ Huckle berry	Sunshine/ Huckle berry	Jaybo
9	Female	24	Neg	yes	5	20	2 Years 0 Months 6Days	3	120	10	6	Menthol or mint	Menthol	Menthol	Innokin cell
10	Male	30	Neg	yes	7	15	0 Years 7 Months 27 Days	3	200	10	1.5	Fruit, Tobacco, Vanilla	Fruit	Fruit-Tropic thunder	Eleaf
11	Male	26	Neg	yes	11	15	2 Years 9 Months 1 Days	3	200	15	3	Someother-Cereal (Fruit loops)	Cereal (Fruit loops)	Cereal	3d print of kangertech drip-box 160
12	Female	26	Pos	yes	10	15	2 Years 4 Months 2 Days	2	30	5	24	Fruit, Tobacco	Fruit	Tobacco	Kanger tank
13	Male	27	Neg	yes	6	3	0 Years 4 Months 26 Days	3	20	5	3	Fruit, Candy, Vanilla	Candy	Vanilla Cinnamon	Eleaf
14	Male	28	Neg	yes	2	2	3 Years 4 Months 29 Days	4	25	2	6	Menthol or mint, Fruit, Vanilla	Fruit	Water melon	Blue cig
15	Female	30	no data	yes	15	20	1 Years 12 Months 393 Days	4	500	5	36	Menthol or mint, Tobacco	Tobacco	Tobacco	Halo
* 3.0 ng/ml cutoff
