# Supplementary material for: Biomarkers of Exposure and Effect in the Lungs of Smokers, Nonsmokers, and Electronic Cigarette Users
Source: Oxford University Press journal article supplement (doi:10.1158/1055-9965.epi-19-1245), 2019-12-17
Supplement: 10559965epi191245-sup-230294_2_supp_5915194_q1bvt4.xlsx [file 10559965epi191245-sup-230294_2_supp_5915194_q1bvt4.xlsx]

## Sheet: Supp1_DETs
Supplementary Table 2. The full list of differentially expressed transcripts between never-smokers, e-cig users, and smokers
Probeset ID	Gene Symbol	p-value(3 Groups)	stepup(p-value(3 Groups))	p-value(gender)	stepup(p-value(gender))	Direction of expression
TC12001003.hg.1	AACS	4.24228e-06	0.000362858	0.76402	0.999976	Smoker>E-cig>Never
TC04001730.hg.1	AADAT	2.79752e-08	5.89309e-06	0.418205	0.999976	Never>E-cig>Smoker
TC15001587.hg.1	AAGAB	7.08116e-08	1.2483e-05	0.940079	0.999976	Smoker>E-cig>Never
TC02002746.hg.1	ABCA12	8.09453e-09	1.94311e-06	0.0771433	0.999976	Smoker>E-cig>Never
TC07000308.hg.1	ABCA13	6.14451e-07	7.79561e-05	0.100159	0.999976	Never>E-cig>Smoker
TC17000805.hg.1	ABCA9-AS1	0.00271842	0.0506187	0.133493	0.999976	E-cig>Never>Smoker
TC02002508.hg.1	ABCB11	0.000136543	0.0055101	0.439003	0.999976	Smoker>E-cig>Never
TC02005056.hg.1	ABCB6	2.6044e-12	1.95887e-09	0.317891	0.999976	Smoker>E-cig>Never
TC16000193.hg.1	ABCC1	1.3438e-12	1.15408e-09	0.532233	0.999976	Smoker>E-cig>Never
TC17000672.hg.1	ABCC3	1.20345e-07	1.97095e-05	0.708873	0.999976	Smoker>E-cig>Never
TC12001392.hg.1	ABCD2	0.00641843	0.0916363	0.105451	0.999976	Never>E-cig>Smoker
TC15000751.hg.1	ABHD17C	7.01838e-06	0.000527133	0.722989	0.999976	Smoker>E-cig>Never
TC15000844.hg.1	ABHD2	6.61294e-11	3.25726e-08	0.796707	0.999976	Smoker>E-cig>Never
TC15002352.hg.1	ABHD2	9.2911e-10	3.38257e-07	0.635399	0.999976	Smoker>E-cig>Never
TC14000130.hg.1	ABHD4	1.28172e-06	0.000136719	0.590178	0.999976	Smoker>Never>E-cig
TC03001612.hg.1	ABI3BP	0.000775003	0.0205361	0.565977	0.999976	Never>E-cig>Smoker
TC01003566.hg.1	ABL2	2.59423e-05	0.00153247	0.852808	0.999976	Smoker>E-cig>Never
TC10001676.hg.1	ABLIM1	0.000251727	0.00883613	0.287637	0.999976	Smoker>E-cig>Never
TC06001034.hg.1	ABRACL	0.00451294	0.0718765	0.723122	0.999976	Smoker>E-cig>Never
TC01000776.hg.1	ACADM	0.000963476	0.0241909	0.714538	0.999976	Never>E-cig>Smoker
TC17000085.hg.1	ACADVL	0.00107521	0.0263168	0.878625	0.999976	Smoker>E-cig>Never
TC09000094.hg.1	ACER2	0.000368314	0.0117265	0.143175	0.999976	Smoker>E-cig>Never
TC03003348.hg.1	ACKR2	0.000195341	0.00742649	0.639079	0.999976	Smoker>E-cig>Never
TC03002310.hg.1	ACKR2	0.000804461	0.0210999	0.232493	0.999976	Smoker>E-cig>Never
TC06000147.hg.1	ACOT13	0.000145788	0.00582702	0.196968	0.999976	Smoker>E-cig>Never
TC03000714.hg.1	ACPP	0.000806774	0.0211275	0.0430916	0.999976	Smoker>E-cig>Never
TC17000667.hg.1	ACSF2	0.00114727	0.027546	0.217806	0.999976	Never>E-cig>Smoker
TC0X002337.hg.1	ACSL4	0.00249752	0.0472877	0.850304	0.999976	Never>E-cig>Smoker
TC20000727.hg.1	ACSS1	2.48653e-08	5.3047e-06	0.150409	0.999976	Never>E-cig>Smoker
TC12000672.hg.1	ACSS3	0.000135837	0.00548819	0.823355	0.999976	Never>E-cig>Smoker
TC14001255.hg.1	ACTN1	0.0015722	0.0341943	0.0397772	0.999976	Never>E-cig>Smoker
TC12000411.hg.1	ACVR1B	0.000175872	0.00686557	0.437296	0.999976	Never>E-cig>Smoker
TC07000525.hg.1	ADAM22	0.000360817	0.0116204	0.0191464	0.999976	Never>E-cig>Smoker
TC07002444.hg.1	ADAM22	0.000458625	0.0139394	0.420946	0.999976	Never>E-cig>Smoker
TC08000190.hg.1	ADAM28	3.09501e-05	0.00176001	0.131673	0.999976	Never>E-cig>Smoker
TC16001879.hg.1	ADAM3B	0.00550279	0.0822448	0.69619	0.999976	Smoker>E-cig>Never
TC08000298.hg.1	ADAM9	0.00235624	0.0454347	0.384154	0.999976	Smoker>E-cig>Never
TC04001277.hg.1	ADAMTS3	0.000200026	0.0075788	0.224948	0.999976	Never>E-cig>Smoker
TC21000785.hg.1	ADARB1	0.000438103	0.0134622	0.815943	0.999976	Never>E-cig>Smoker
TC01001866.hg.1	ADCK3	0.00413395	0.0674772	0.619673	0.999976	Smoker>E-cig>Never
TC05000054.hg.1	ADCY2	1.09085e-06	0.000120983	0.552012	0.999976	Never>E-cig>Smoker
TC04000039.hg.1	ADD1	0.00331906	0.0578603	0.460638	0.999976	Never>E-cig>Smoker
TC10002831.hg.1	ADD3-AS1	1.75001e-05	0.00109766	0.757579	0.999976	Smoker>E-cig>Never
TC04002488.hg.1	ADGRA3	0.000447332	0.0136956	0.143102	0.999976	Never>E-cig>Smoker
TC04001079.hg.1	ADGRA3	0.00107854	0.0263392	0.166313	0.999976	Never>E-cig>Smoker
TC06001776.hg.1	ADGRF1	0.0053323	0.0804142	0.0462312	0.999976	Smoker>E-cig>Never
TC19002351.hg.1	ADGRL1	0.00592022	0.0865526	0.109829	0.999976	Never>E-cig>Smoker
TC04001412.hg.1	ADH7	2.07914e-13	2.24641e-10	0.485397	0.999976	Smoker>E-cig>Never
TC04002642.hg.1	ADH7	8.17529e-13	7.54533e-10	0.524881	0.999976	Smoker>E-cig>Never
TC02001524.hg.1	ADI1	0.00480968	0.0751728	0.515642	0.999976	Smoker>E-cig>Never
TC12000540.hg.1	AGAP2-AS1	0.00228619	0.0445441	0.504496	0.999976	Smoker>E-cig>Never
TC02000159.hg.1	AGBL5	0.00104719	0.0257333	0.42996	0.999976	Smoker>E-cig>Never
TC01000462.hg.1	AGO4	0.00118994	0.0282654	0.403483	0.999976	Never>E-cig>Smoker
TC07001163.hg.1	AGR2	4.46619e-07	6.08092e-05	0.17591	0.999976	Smoker>E-cig>Never
TC09001287.hg.1	AGTPBP1	0.000204126	0.00766787	0.503041	0.999976	Smoker>E-cig>Never
TC05000005.hg.1	AHRR	5.37435e-07	6.92341e-05	0.699421	0.999976	Smoker>E-cig>Never
TC09002305.hg.1	AIF1L	0.00504061	0.0773947	0.675377	0.999976	Smoker>Never>E-cig
TC10001359.hg.1	AIFM2	3.68846e-05	0.00202195	0.75223	0.999976	Smoker>E-cig>Never
TC06002965.hg.1	AIM1	0.000240319	0.00857265	0.540722	0.999976	Never>E-cig>Smoker
TC01004159.hg.1	AJAP1	7.81591e-06	0.000564194	0.188204	0.999976	Smoker>E-cig>Never
TC01000080.hg.1	AJAP1	8.3322e-06	0.000595051	0.0738334	0.999976	Smoker>E-cig>Never
TC01000081.hg.1	AJAP1	6.3033e-05	0.00309564	0.0508865	0.999976	Smoker>E-cig>Never
TC01005394.hg.1	AK2	0.000562532	0.0160763	0.615164	0.999976	Never>E-cig>Smoker
TC01002479.hg.1	AK2	0.00170398	0.0362138	0.866576	0.999976	Never>E-cig>Smoker
TC17000704.hg.1	AKAP1	0.000487925	0.0145916	0.986108	0.999976	Smoker>E-cig>Never
TC06001100.hg.1	AKAP12	0.00115881	0.0277038	0.899409	0.999976	Smoker>E-cig>Never
TC06000982.hg.1	AKAP7	0.000968402	0.0242675	0.299309	0.999976	E-cig>Never>Smoker
TC01000491.hg.1	AKIRIN1	0.00569197	0.0841336	0.824939	0.999976	Smoker>E-cig>Never
TC01000574.hg.1	AKR1A1	0.00021316	0.0079065	0.188398	0.999976	Smoker>E-cig>Never
TC07001883.hg.1	AKR1B1	2.28881e-10	1.02215e-07	0.0279195	0.999976	Smoker>E-cig>Never
TC07002600.hg.1	AKR1B10	3.63067e-18	4.05352e-14	0.833383	0.999976	Smoker>E-cig>Never
TC07000834.hg.1	AKR1B10	5.6639e-18	4.74267e-14	0.58879	0.999976	Smoker>E-cig>Never
TC07000835.hg.1	AKR1B15	2.00613e-16	1.34387e-12	0.704318	0.999976	Smoker>E-cig>Never
TC10002924.hg.1	AKR1C1	4.45097e-10	1.86351e-07	0.944271	0.999976	Smoker>E-cig>Never
TC10000986.hg.1	AKR1C2	2.63178e-12	1.95887e-09	0.963549	0.999976	Smoker>E-cig>Never
TC10002925.hg.1	AKR1C3	1.74829e-12	1.42822e-09	0.893027	0.999976	Smoker>E-cig>Never
TC10000044.hg.1	AKR1C4	2.54246e-11	1.44334e-08	0.897424	0.999976	Smoker>E-cig>Never
TC10000983.hg.1	AKR1C6P	0.000362865	0.0116527	0.688009	0.999976	Smoker>E-cig>Never
TC10000989.hg.1	AKR1C8P	5.7838e-05	0.00287422	0.63538	0.999976	Smoker>E-cig>Never
TC01004040.hg.1	AKT3	0.00199814	0.0403835	0.732464	0.999976	Never>E-cig>Smoker
TC01006240.hg.1	AKT3	0.00339614	0.0585271	0.75265	0.999976	Never>E-cig>Smoker
TC09000231.hg.1	AL353791.1	0.00304007	0.0542194	0.925628	0.999976	Smoker>E-cig>Never
TC03000329.hg.1	ALAS1	0.000298622	0.0100929	0.0539448	0.999976	Smoker>E-cig>Never
TC10001551.hg.1	ALDH18A1	0.000202829	0.00763323	0.149339	0.999976	Smoker>E-cig>Never
TC15000971.hg.1	ALDH1A3	3.99606e-08	7.82714e-06	0.28074	0.999976	Smoker>E-cig>Never
TC12000871.hg.1	ALDH2	1.17207e-05	0.000796293	0.321608	0.999976	Never>E-cig>Smoker
TC12003212.hg.1	ALDH2	0.00135487	0.0308079	0.635966	0.999976	Never>E-cig>Smoker
TC17001250.hg.1	ALDH3A1	8.27816e-15	1.54038e-11	0.621424	0.999976	Smoker>E-cig>Never
TC11000702.hg.1	ALDH3B1	0.00130494	0.0299162	0.172253	0.999976	Never>E-cig>Smoker
TC05001742.hg.1	ALDH7A1	7.23127e-05	0.00340174	0.389462	0.999976	Never>E-cig>Smoker
TC16000338.hg.1	ALDOA	1.16905e-06	0.000127962	0.435979	0.999976	Smoker>E-cig>Never
TC17002465.hg.1	ALOX12-AS1	0.00230572	0.0447178	0.766976	0.999976	Never>E-cig>Smoker
TC0X001273.hg.1	AMMECR1	0.00509106	0.0779603	0.275685	0.999976	Smoker>E-cig>Never
TC0X001286.hg.1	AMOT	0.000239667	0.00856712	0.894329	0.999976	Never>E-cig>Smoker
TC01002935.hg.1	AMY1B	2.87377e-05	0.00166242	0.925755	0.999976	Never>E-cig>Smoker
TC01000919.hg.1	AMY1B	3.27498e-05	0.00184047	0.927258	0.999976	Never>E-cig>Smoker
TC01000921.hg.1	AMY1B	3.43554e-05	0.00190513	0.961177	0.999976	Never>E-cig>Smoker
TC01000918.hg.1	AMY2A	8.88561e-06	0.000626557	0.947732	0.999976	Never>E-cig>Smoker
TC01000920.hg.1	AMY2A	1.00154e-05	0.000698869	0.893373	0.999976	Never>E-cig>Smoker
TC17000801.hg.1	AMZ2	0.00103035	0.0255068	0.997516	0.999976	Smoker>E-cig>Never
TC10002123.hg.1	ANAPC16	0.000538479	0.0156154	0.812362	0.999976	Smoker>E-cig>Never
TC08001521.hg.1	ANGPT1	5.24636e-07	6.83742e-05	0.576398	0.999976	Never>E-cig>Smoker
TC04000584.hg.1	ANK2	0.00133709	0.0305279	0.306261	0.999976	Smoker>E-cig>Never
TC21000281.hg.1	ANKRD20A11P	0.00444627	0.0712211	0.597449	0.999976	Smoker>Never>E-cig
TC03001213.hg.1	ANKRD28	0.00318223	0.0561272	0.144367	0.999976	Smoker>E-cig>Never
TC02002645.hg.1	ANKRD44	0.00167941	0.0359048	0.580214	0.999976	Never>E-cig>Smoker
TC08001479.hg.1	ANKRD46	0.00462657	0.0731645	0.784455	0.999976	Never>E-cig>Smoker
TC12001599.hg.1	ANKRD52	0.00450132	0.071794	0.123409	0.999976	Smoker>E-cig>Never
TC03001334.hg.1	ANO10	4.94585e-05	0.00256037	0.0931175	0.999976	Smoker>E-cig>Never
TC0X000829.hg.1	ANOS1	0.000303392	0.0102	0.256908	0.999976	Never>E-cig>Smoker
TC15001837.hg.1	ANPEP	0.00376692	0.0634054	0.903086	0.999976	Never>E-cig>Smoker
TC15001505.hg.1	ANXA2	0.00303314	0.0541824	0.324227	0.999976	Smoker>E-cig>Never
TC09000149.hg.1	ANXA2	0.00513167	0.0783035	0.810786	0.999976	Smoker>E-cig>Never
TC04002792.hg.1	ANXA2P1	0.00457852	0.0726446	0.880658	0.999976	Smoker>E-cig>Never
TC09001875.hg.1	ANXA2P2	0.00551384	0.0823105	0.642662	0.999976	Smoker>E-cig>Never
TC10000391.hg.1	ANXA2P3	5.39991e-05	0.00274453	0.0439926	0.999976	Smoker>E-cig>Never
TC04000437.hg.1	ANXA3	3.03765e-05	0.00173623	0.27174	0.999976	Smoker>E-cig>Never
TC05001947.hg.1	ANXA6	3.53676e-06	0.000315053	0.940574	0.999976	Never>E-cig>Smoker
TC10001408.hg.1	ANXA7	0.00582279	0.0854483	0.781332	0.999976	Smoker>E-cig>Never
TC01001197.hg.1	ANXA9	0.00327202	0.0572287	0.962473	0.999976	Never>E-cig>Smoker
TC19000320.hg.1	AP1M1	0.00112538	0.0271566	0.828736	0.999976	Smoker>E-cig>Never
TC07000644.hg.1	AP1S1	0.003963	0.0655166	0.483131	0.999976	Smoker>E-cig>Never
TC05000548.hg.1	AP3S1	0.00194948	0.0396229	0.346212	0.999976	Smoker>E-cig>Never
TC04002304.hg.1	APELA	2.03657e-06	0.000200038	0.61108	0.999976	Never>E-cig>Smoker
TC04000823.hg.1	APELA	4.90044e-06	0.000409315	0.499594	0.999976	Never>E-cig>Smoker
TC01004175.hg.1	APITD1	1.46929e-05	0.000957438	0.973725	0.999976	Smoker>E-cig>Never
TC01000130.hg.1	APITD1-CORT	9.21777e-06	0.000648614	0.653423	0.999976	Smoker>E-cig>Never
TC02004967.hg.1	APLF	0.000586801	0.016558	0.0845677	0.999976	Never>E-cig>Smoker
TC0X002013.hg.1	APOO	0.000386681	0.0121382	0.975439	0.999976	Smoker>E-cig>Never
TC0X000923.hg.1	APOO	0.00104388	0.0257289	0.896443	0.999976	Smoker>E-cig>Never
TC14002313.hg.1	APOPT1	0.00125255	0.0291948	0.925271	0.999976	Smoker>E-cig>Never
TC12001913.hg.1	APPL2	2.46786e-06	0.000232841	0.57555	0.999976	Never>E-cig>Smoker
TC18000429.hg.1	AQP4	0.00377282	0.0634054	0.538888	0.999976	Never>E-cig>Smoker
TC18000663.hg.1	AQP4-AS1	0.00496077	0.076707	0.677917	0.999976	E-cig>Never>Smoker
TC0X000358.hg.1	AR	0.000606959	0.0169979	0.141358	0.999976	Never>E-cig>Smoker
TC11001730.hg.1	ARFGAP2	0.00173407	0.0366673	0.826869	0.999976	Never>E-cig>Smoker
TC06001029.hg.1	ARFGEF3	2.32525e-10	1.02476e-07	0.932083	0.999976	Never>E-cig>Smoker
TC11001358.hg.1	ARFIP2	0.00350618	0.0598552	0.00750974	0.999976	Smoker>E-cig>Never
TC11002275.hg.1	ARHGAP20	0.00277518	0.0512131	0.496581	0.999976	Never>E-cig>Smoker
TC04000466.hg.1	ARHGAP24	0.000641154	0.0177331	0.144241	0.999976	Never>E-cig>Smoker
TC18000033.hg.1	ARHGAP28	0.000864994	0.0222349	0.16379	0.999976	E-cig>Never>Smoker
TC0X000858.hg.1	ARHGAP6	1.82679e-05	0.00113523	0.734211	0.999976	Never>E-cig>Smoker
TC03000844.hg.1	ARHGEF26	0.00169537	0.0360996	0.842973	0.999976	Never>E-cig>Smoker
TC03001488.hg.1	ARHGEF3	0.00422049	0.0685554	0.742198	0.999976	Smoker>E-cig>Never
TC10001624.hg.1	ARL3	0.000728226	0.019551	0.918347	0.999976	Smoker>E-cig>Never
TC02000942.hg.1	ARL6IP6	0.00601111	0.0874614	0.650617	0.999976	Never>E-cig>Smoker
TC0X001224.hg.1	ARMCX2	0.00267991	0.050034	0.362316	0.999976	Smoker>E-cig>Never
TC0X000481.hg.1	ARMCX3	0.00041889	0.0129642	0.0935909	0.999976	Smoker>E-cig>Never
TC01003212.hg.1	ARNT	0.00020278	0.00763323	0.362949	0.999976	Never>E-cig>Smoker
TC12000264.hg.1	ARNTL2	0.00243385	0.0463218	0.990041	0.999976	Smoker>E-cig>Never
TC12003222.hg.1	ARPC3	0.00203064	0.0408495	0.95674	0.999976	Smoker>E-cig>Never
TC11002092.hg.1	ARRB1	2.13376e-09	6.55672e-07	0.0275699	0.999976	Never>E-cig>Smoker
TC15000945.hg.1	ARRDC4	0.00447221	0.0714999	0.662666	0.999976	Smoker>E-cig>Never
TC0X000805.hg.1	ARSD	0.000289345	0.00985891	1.37729e-14	1.35679e-11	Never>E-cig>Smoker
TC17000802.hg.1	ARSG	0.003446	0.0592203	0.184866	0.999976	Never>E-cig>Smoker
TC10001246.hg.1	ASAH2C	0.00201344	0.040601	0.0415012	0.999976	Smoker>E-cig>Never
TC14001461.hg.1	ASB2	0.00641529	0.0916306	0.502961	0.999976	Smoker>E-cig>Never
TC12000386.hg.1	ASIC1	0.00714025	0.0982158	0.010437	0.999976	Never>Smoker>E-cig
TC08001264.hg.1	ASPH	0.000227743	0.00826439	0.882406	0.999976	Smoker>E-cig>Never
TC01006023.hg.1	ASPM	0.00178372	0.0374571	0.363528	0.999976	Smoker>E-cig>Never
TC01003662.hg.1	ASPM	0.00319682	0.0563057	0.334072	0.999976	Smoker>E-cig>Never
TC09001526.hg.1	ASTN2	0.00333852	0.0579681	0.711045	0.999976	Never>E-cig>Smoker
TC08001584.hg.1	ATAD2	0.00219684	0.0431306	0.496791	0.999976	Never>E-cig>Smoker
TC02001415.hg.1	ATG16L1	0.000112927	0.00476371	0.330594	0.999976	Never>E-cig>Smoker
TC15001079.hg.1	ATP10A	0.000158289	0.00625943	0.556317	0.999976	Never>E-cig>Smoker
TC13000057.hg.1	ATP12A	6.12648e-05	0.00301322	0.646502	0.999976	Never>E-cig>Smoker
TC13000966.hg.1	ATP12A	0.000181438	0.00703349	0.762117	0.999976	Never>E-cig>Smoker
TC01002285.hg.1	ATP13A2	0.00237055	0.0455942	0.900715	0.999976	Smoker>E-cig>Never
TC03002121.hg.1	ATP13A4	0.000535564	0.0155714	0.0240618	0.999976	Never>E-cig>Smoker
TC01001018.hg.1	ATP1A1	0.00568385	0.0840879	0.282988	0.999976	Never>E-cig>Smoker
TC17001015.hg.1	ATP2A3	5.73221e-06	0.000462186	0.114718	0.999976	Smoker>E-cig>Never
TC20001753.hg.1	ATP5E	0.0070494	0.0973661	0.884775	0.999976	Smoker>E-cig>Never
TC13000083.hg.1	ATP5EP2	0.0019593	0.0397967	0.983671	0.999976	Smoker>E-cig>Never
TC17000633.hg.1	ATP5G1	0.00711716	0.0979863	0.546271	0.999976	Smoker>Never>E-cig
TC04002406.hg.1	ATP5I	8.30339e-05	0.00379419	0.925666	0.999976	Smoker>E-cig>Never
TC04000951.hg.1	ATP5I	0.000244611	0.00865903	0.652565	0.999976	Smoker>E-cig>Never
TC07003366.hg.1	ATP5J2	0.00451024	0.0718691	0.333034	0.999976	Smoker>Never>E-cig
TC0X001937.hg.1	ATP6AP1	0.000242143	0.00860058	0.0799504	0.999976	Smoker>E-cig>Never
TC07001906.hg.1	ATP6V0A4	1.00929e-11	6.50096e-09	0.037167	0.999976	Smoker>E-cig>Never
TC08000536.hg.1	ATP6V0D2	0.00317329	0.056058	0.697359	0.999976	Smoker>E-cig>Never
TC02000423.hg.1	ATP6V1B1	0.000103676	0.00448648	0.483762	0.999976	Never>E-cig>Smoker
TC22000474.hg.1	ATP6V1E1	0.000817755	0.021365	0.718648	0.999976	Smoker>E-cig>Never
TC07000786.hg.1	ATP6V1F	0.00354887	0.0603993	0.541259	0.999976	Smoker>E-cig>Never
TC04001152.hg.1	ATP8A1	0.00541459	0.0812892	0.92892	0.999976	Never>E-cig>Smoker
TC15001347.hg.1	ATP8B4	0.00169475	0.0360996	0.303688	0.999976	Never>E-cig>Smoker
TC19000576.hg.1	AXL	0.000836216	0.0217455	0.821579	0.999976	Never>E-cig>Smoker
TC07001652.hg.1	AZGP1	0.00229431	0.0445999	0.511371	0.999976	Smoker>E-cig>Never
TC11000826.hg.1	B3GNT6	1.21133e-06	0.000132157	0.481767	0.999976	Smoker>E-cig>Never
TC03001680.hg.1	B4GALT4	4.48529e-07	6.0822e-05	0.958375	0.999976	Smoker>E-cig>Never
TC03000606.hg.1	B4GALT4-AS1	9.42232e-05	0.00418639	0.5864	0.999976	E-cig>Smoker>Never
TC08000643.hg.1	BAALC	0.00194086	0.0396144	0.488677	0.999976	E-cig>Smoker>Never
TC11003367.hg.1	BACE1	0.00183044	0.0380962	0.31796	0.999976	Never>E-cig>Smoker
TC11002895.hg.1	BACE1-AS	0.00251077	0.047485	0.653516	0.999976	Never>E-cig>Smoker
TC11001053.hg.1	BACE1-AS	0.00605679	0.0878845	0.906273	0.999976	Never>E-cig>Smoker
TC21000185.hg.1	BACE2	0.00335547	0.058202	0.6656	0.999976	Smoker>E-cig>Never
TC21000736.hg.1	BACE2	0.00373905	0.0630734	0.613706	0.999976	Smoker>E-cig>Never
TC06001946.hg.1	BACH2	0.000102174	0.00445024	0.365718	0.999976	Smoker>E-cig>Never
TC09001009.hg.1	BAG1	0.00324011	0.0568785	0.253051	0.999976	Smoker>E-cig>Never
TC06000684.hg.1	BAG2	0.000353249	0.0114649	0.282073	0.999976	Smoker>E-cig>Never
TC16001379.hg.1	BAIAP3	0.00228745	0.0445441	0.706427	0.999976	Smoker>E-cig>Never
TC16000040.hg.1	BAIAP3	0.00302902	0.0541695	0.724919	0.999976	Smoker>E-cig>Never
TC04000524.hg.1	BANK1	5.61771e-05	0.00281676	0.478313	0.999976	Never>E-cig>Smoker
TC02002745.hg.1	BARD1	0.000896914	0.0229498	0.0933128	0.999976	Never>E-cig>Smoker
TC05000096.hg.1	BASP1	0.000366883	0.0116929	0.78423	0.999976	Smoker>E-cig>Never
TC20000960.hg.1	BCAS1	0.00606095	0.0878845	0.59563	0.999976	E-cig>Smoker>Never
TC12001484.hg.1	BCDIN3D	0.0022116	0.0432742	0.485164	0.999976	E-cig>Never>Smoker
TC02001885.hg.1	BCL11A	0.00581035	0.0853561	0.356984	0.999976	Never>E-cig>Smoker
TC22000025.hg.1	BCL2L13	1.67088e-05	0.00105394	0.603686	0.999976	Smoker>E-cig>Never
TC03002096.hg.1	BCL6	4.30607e-05	0.0022857	0.031553	0.999976	Never>E-cig>Smoker
TC20000655.hg.1	BFSP1	0.000208292	0.00779833	0.598862	0.999976	Smoker>E-cig>Never
TC05000386.hg.1	BHMT2	0.000686734	0.01867	0.221075	0.999976	Smoker>E-cig>Never
TC06003448.hg.1	BLOC1S5-TXNDC5	0.00531839	0.0802768	0.762336	0.999976	Smoker>E-cig>Never
TC19001542.hg.1	BLVRB	0.000102942	0.00447294	0.501564	0.999976	Smoker>E-cig>Never
TC14001148.hg.1	BMP4	2.13276e-09	6.55672e-07	0.131358	0.999976	Smoker>E-cig>Never
TC20000972.hg.1	BMP7	0.000537153	0.015604	0.207891	0.999976	Smoker>E-cig>Never
TC04000503.hg.1	BMPR1B	9.21527e-08	1.55887e-05	0.473283	0.999976	Smoker>E-cig>Never
TC02001992.hg.1	BOLA3	0.000237433	0.00853282	0.352931	0.999976	Smoker>E-cig>Never
TC12000174.hg.1	BORCS5	0.00444283	0.0712	0.470394	0.999976	Smoker>E-cig>Never
TC20000281.hg.1	BPI	0.00394887	0.0653476	0.560875	0.999976	Never>E-cig>Smoker
TC20000225.hg.1	BPIFA2	0.000112036	0.00475004	0.782414	0.999976	Smoker>E-cig>Never
TC20000229.hg.1	BPIFB1	0.000215367	0.00797071	0.641675	0.999976	Smoker>E-cig>Never
TC20000220.hg.1	BPIFB2	0.000420172	0.0129707	0.301775	0.999976	Smoker>E-cig>Never
TC11003487.hg.1	BSCL2	0.00199904	0.0403835	0.775327	0.999976	Smoker>E-cig>Never
TC12000828.hg.1	BTBD11	0.000918178	0.023359	0.904237	0.999976	Smoker>E-cig>Never
TC20000088.hg.1	BTBD3	0.00179137	0.0375235	0.840258	0.999976	Smoker>E-cig>Never
TC11002281.hg.1	BTG4	0.00276198	0.0511441	0.654152	0.999976	Never>E-cig>Smoker
TC07000110.hg.1	BZW2	1.55072e-05	0.000993116	0.461212	0.999976	Smoker>E-cig>Never
TC07002162.hg.1	BZW2	0.000107059	0.00458546	0.852131	0.999976	Smoker>E-cig>Never
TC11002005.hg.1	C11orf24	0.000460229	0.0139495	0.885447	0.999976	Smoker>E-cig>Never
TC11000951.hg.1	C11orf70	0.00553496	0.0824379	0.532185	0.999976	Smoker>E-cig>Never
TC12002009.hg.1	C12orf49	5.50092e-09	1.45077e-06	0.657745	0.999976	Smoker>E-cig>Never
TC12000713.hg.1	C12orf74	0.000704658	0.0190799	0.35433	0.999976	Never>E-cig>Smoker
TC14000141.hg.1	C14orf119	0.00419425	0.0681953	0.121042	0.999976	Smoker>E-cig>Never
TC14000599.hg.1	C14orf132	4.49576e-05	0.0023602	0.386899	0.999976	Never>E-cig>Smoker
TC14001831.hg.1	C14orf132	0.000420159	0.0129707	0.715001	0.999976	Never>E-cig>Smoker
TC16001446.hg.1	C16orf52	0.00347871	0.05957	0.744906	0.999976	Never>E-cig>Smoker
TC16001086.hg.1	C16orf87	0.00696132	0.0964278	0.924072	0.999976	Smoker>E-cig>Never
TC16000841.hg.1	C16orf89	0.00172195	0.0365493	0.631151	0.999976	Never>E-cig>Smoker
TC18001002.hg.1	C18orf32	3.21509e-05	0.00181596	0.744376	0.999976	Smoker>E-cig>Never
TC19000524.hg.1	C19orf33	0.00311638	0.0552276	0.59242	0.999976	Smoker>E-cig>Never
TC01001476.hg.1	C1orf112	0.00477206	0.0747943	0.176418	0.999976	Never>E-cig>Smoker
TC01002702.hg.1	C1orf168	4.06044e-06	0.000351422	0.23949	0.999976	Never>E-cig>Smoker
TC02002250.hg.1	C1QL2	0.00230272	0.0446855	0.307849	0.999976	Smoker>Never>E-cig
TC05003423.hg.1	C1QTNF3	0.00408213	0.0668951	0.973453	0.999976	Never>E-cig>Smoker
TC05003448.hg.1	C1QTNF3-AMACR	0.00276228	0.0511441	0.294692	0.999976	Never>E-cig>Smoker
TC13000959.hg.1	C1QTNF9B-AS1	9.96448e-05	0.00436846	0.955592	0.999976	Smoker>E-cig>Never
TC13000050.hg.1	C1QTNF9B-AS1	0.000209747	0.00782322	0.742932	0.999976	Smoker>E-cig>Never
TC13000490.hg.1	C1QTNF9B-AS1	0.00567664	0.0840183	0.74889	0.999976	Smoker>E-cig>Never
TC20001204.hg.1	C20orf24	0.00121686	0.0287024	0.91875	0.999976	Smoker>E-cig>Never
TC20001730.hg.1	C20orf24	0.001907	0.039138	0.936086	0.999976	Smoker>E-cig>Never
TC22000780.hg.1	C22orf23	0.0040006	0.0660404	0.315674	0.999976	Smoker>E-cig>Never
TC02002643.hg.1	C2orf66	0.00568907	0.0841279	0.0588151	0.999976	Smoker>E-cig>Never
TC02000152.hg.1	C2orf70	0.00027478	0.00944915	0.969151	0.999976	Smoker>E-cig>Never
TC19001103.hg.1	C3	1.1575e-06	0.000127113	0.308277	0.999976	Never>E-cig>Smoker
TC03003321.hg.1	C3orf30	0.00641501	0.0916306	0.805251	0.999976	E-cig>Smoker>Never
TC03003384.hg.1	C3orf62	0.00194607	0.0396229	0.777025	0.999976	Smoker>E-cig>Never
TC03001503.hg.1	C3orf67	2.86919e-05	0.00166242	0.914375	0.999976	Smoker>E-cig>Never
TC06002720.hg.1	C4A	0.00458641	0.0727011	0.89417	0.999976	Never>E-cig>Smoker
TC6_mcf_hap5000197.hg.1	C4B	0.00659468	0.0929639	0.87899	0.999976	Never>E-cig>Smoker
TC6_qbl_hap6000208.hg.1	C4B	0.00665071	0.0935176	0.884678	0.999976	Never>E-cig>Smoker
TC6_dbb_hap3000224.hg.1	C4B	0.0069274	0.0961568	0.886989	0.999976	Never>E-cig>Smoker
TC6_ssto_hap7000201.hg.1	C4B	0.00701664	0.0970336	0.872385	0.999976	Never>E-cig>Smoker
TC6_ssto_hap7000071.hg.1	C4B	0.0071449	0.0982394	0.868883	0.999976	Never>E-cig>Smoker
TC6_dbb_hap3000078.hg.1	C4B	0.00719152	0.0986779	0.872766	0.999976	Never>E-cig>Smoker
TC6_cox_hap2000227.hg.1	C4B	0.00721624	0.0988955	0.874549	0.999976	Never>E-cig>Smoker
TC01004981.hg.1	C4BPA	0.000439772	0.0135011	0.108184	0.999976	Never>E-cig>Smoker
TC04000515.hg.1	C4orf17	0.000177783	0.00692404	0.582215	0.999976	Smoker>E-cig>Never
TC05000499.hg.1	C5orf30	6.51509e-09	1.64073e-06	0.530976	0.999976	Smoker>E-cig>Never
TC06000786.hg.1	C6orf163	0.000175036	0.00684888	0.301226	0.999976	Smoker>E-cig>Never
TC06000872.hg.1	C6orf183	8.78396e-08	1.50877e-05	0.879839	0.999976	Smoker>E-cig>Never
TC06003465.hg.1	C6orf52	0.00404897	0.0666315	0.00471575	0.999976	Smoker>E-cig>Never
TC07001208.hg.1	C7orf31	0.00137057	0.0310176	0.0163979	0.999976	Never>E-cig>Smoker
TC08002618.hg.1	C8orf76	2.3555e-06	0.000225543	0.833056	0.999976	Smoker>E-cig>Never
TC09000322.hg.1	C9orf135	0.00498783	0.0769164	0.485512	0.999976	Smoker>E-cig>Never
TC09000585.hg.1	C9orf91	0.00357921	0.0607921	0.481869	0.999976	E-cig>Never>Smoker
TC17001705.hg.1	CA10	0.00207763	0.0414462	0.149318	0.999976	Smoker>E-cig>Never
TC15001541.hg.1	CA12	2.51439e-06	0.000236565	0.132868	0.999976	Smoker>E-cig>Never
TC01000110.hg.1	CA6	0.000104557	0.00451294	0.340099	0.999976	Smoker>E-cig>Never
TC08001253.hg.1	CA8	2.4655e-09	7.4396e-07	0.370612	0.999976	Never>E-cig>Smoker
TC18000653.hg.1	CABLES1	0.00433075	0.0698046	0.691328	0.999976	E-cig>Never>Smoker
TC18000106.hg.1	CABYR	5.1462e-16	2.00421e-12	0.772085	0.999976	Smoker>E-cig>Never
TC12001095.hg.1	CACNA1C-AS4	0.00313024	0.0553559	0.0427876	0.999976	E-cig>Never>Smoker
TC03000351.hg.1	CACNA1D	6.89106e-07	8.61228e-05	0.316678	0.999976	Smoker>E-cig>Never
TC03000353.hg.1	CACNA2D3	1.48449e-09	4.97216e-07	0.614061	0.999976	Smoker>E-cig>Never
TC02002430.hg.1	CACNB4	0.00119073	0.0282654	0.29394	0.999976	Never>E-cig>Smoker
TC17000790.hg.1	CACNG4	1.03466e-11	6.53869e-09	0.532394	0.999976	Smoker>E-cig>Never
TC12002894.hg.1	CALCOCO1	0.00183874	0.0380962	0.665517	0.999976	Never>E-cig>Smoker
TC12001554.hg.1	CALCOCO1	0.00202551	0.0407952	0.716235	0.999976	Never>E-cig>Smoker
TC17002259.hg.1	CALCOCO2	0.000257931	0.0089991	0.964614	0.999976	Never>E-cig>Smoker
TC17000631.hg.1	CALCOCO2	0.0012354	0.0288792	0.846903	0.999976	Never>E-cig>Smoker
TC05000667.hg.1	CAMLG	0.00499565	0.0769977	0.366649	0.999976	Smoker>E-cig>Never
TC09001720.hg.1	CAMSAP1	0.000619128	0.0172521	0.810825	0.999976	Smoker>E-cig>Never
TC01000096.hg.1	CAMTA1	0.00564757	0.0837731	0.286445	0.999976	Never>E-cig>Smoker
TC02001712.hg.1	CAPN13	1.27834e-08	2.89302e-06	0.113547	0.999976	Never>E-cig>Smoker
TC01001838.hg.1	CAPN2	0.00569655	0.0841643	0.214878	0.999976	E-cig>Smoker>Never
TC15002793.hg.1	CAPN3	0.00473137	0.0743305	0.915498	0.999976	Never>E-cig>Smoker
TC11001289.hg.1	CARS	0.000369088	0.01174	0.969354	0.999976	Smoker>E-cig>Never
TC11003010.hg.1	CARS	0.00188441	0.0388169	0.997089	0.999976	Smoker>E-cig>Never
TC17000490.hg.1	CASC3	0.00241674	0.0461146	0.869396	0.999976	Never>E-cig>Smoker
TC08002519.hg.1	CASC8	0.00095148	0.0239616	0.252548	0.999976	Smoker>E-cig>Never
TC11003320.hg.1	CASP12	0.00656271	0.0926693	0.464933	0.999976	Smoker>Never>E-cig
TC04001464.hg.1	CASP6	0.00437094	0.070254	0.139521	0.999976	Smoker>E-cig>Never
TC01002191.hg.1	CASZ1	0.00132168	0.0302379	0.450691	0.999976	E-cig>Never>Smoker
TC21000148.hg.1	CBR1	6.68778e-14	8.6154e-11	0.322442	0.999976	Smoker>E-cig>Never
TC21000152.hg.1	CBR3	3.40087e-09	9.65328e-07	0.542019	0.999976	Smoker>E-cig>Never
TC21000700.hg.1	CBR3	0.00402533	0.066318	0.869592	0.999976	Smoker>E-cig>Never
TC12001566.hg.1	CBX5	0.00113956	0.0274002	0.301634	0.999976	Never>E-cig>Smoker
TC22000302.hg.1	CBY1	0.00136711	0.0309738	0.814247	0.999976	Smoker>E-cig>Never
TC02000959.hg.1	CCDC148-AS1	0.000823627	0.0214681	0.185975	0.999976	Smoker>Never>E-cig
TC05002348.hg.1	CCDC152	0.00377259	0.0634054	0.98465	0.999976	Never>E-cig>Smoker
TC0X000634.hg.1	CCDC160	0.00272755	0.0507511	0.952798	0.999976	Smoker>E-cig>Never
TC0X001872.hg.1	CCDC160	0.00413971	0.0674772	0.770392	0.999976	Smoker>E-cig>Never
TC06000875.hg.1	CCDC162P	1.07135e-07	1.78527e-05	0.820495	0.999976	Smoker>E-cig>Never
TC06000873.hg.1	CCDC162P	1.98369e-06	0.000196574	0.562372	0.999976	Smoker>E-cig>Never
TC06002981.hg.1	CCDC162P	5.63204e-06	0.000456755	0.545717	0.999976	Smoker>E-cig>Never
TC06001684.hg.1	CCDC167	0.000405858	0.0126454	0.552455	0.999976	Smoker>E-cig>Never
TC01003456.hg.1	CCDC190	0.000271909	0.00939868	0.950332	0.999976	Smoker>E-cig>Never
TC06001032.hg.1	CCDC28A	0.00608398	0.0880399	0.919874	0.999976	Smoker>E-cig>Never
TC15002799.hg.1	CCDC33	0.00358519	0.0608628	0.136625	0.999976	Never>E-cig>Smoker
TC12000938.hg.1	CCDC64	0.0059925	0.0873043	0.330296	0.999976	Smoker>E-cig>Never
TC05001949.hg.1	CCDC69	1.87226e-06	0.000186635	0.0549132	0.999976	Never>E-cig>Smoker
TC19001646.hg.1	CCDC8	0.000328996	0.0108111	0.793872	0.999976	Never>E-cig>Smoker
TC14001436.hg.1	CCDC88C	2.72825e-06	0.00025313	0.238378	0.999976	Never>E-cig>Smoker
TC04001006.hg.1	CCDC96	0.00010572	0.00454555	0.755437	0.999976	Smoker>E-cig>Never
TC17002171.hg.1	CCL11	0.00152286	0.0334251	0.381316	0.999976	Smoker>E-cig>Never
TC04001516.hg.1	CCNA2	0.00368542	0.0622802	0.0400117	0.999976	Smoker>E-cig>Never
TC15000449.hg.1	CCNB2	0.00248603	0.04715	0.6531	0.999976	Smoker>E-cig>Never
TC11000718.hg.1	CCND1	2.08878e-05	0.00127435	0.794398	0.999976	Never>E-cig>Smoker
TC12000060.hg.1	CCND2	3.77604e-06	0.000334316	0.0509838	0.999976	Never>E-cig>Smoker
TC04001319.hg.1	CCNI	0.00104187	0.0257188	0.758573	0.999976	Never>E-cig>Smoker
TC05002007.hg.1	CCNJL	0.000213604	0.00791422	0.668075	0.999976	Smoker>E-cig>Never
TC02001232.hg.1	CCNYL1	0.0022907	0.0445609	0.847338	0.999976	Smoker>E-cig>Never
TC15002774.hg.1	CCPG1	0.00157092	0.0341887	0.97545	0.999976	Smoker>E-cig>Never
TC06000737.hg.1	CD109	1.58582e-05	0.0010098	0.552223	0.999976	Smoker>E-cig>Never
TC12001161.hg.1	CD163L1	1.01209e-06	0.000114912	0.0627704	0.999976	Smoker>E-cig>Never
TC01006074.hg.1	CD34	0.000506569	0.0150222	0.852698	0.999976	Never>E-cig>Smoker
TC20000365.hg.1	CD40	0.0065472	0.0926173	0.846007	0.999976	Never>E-cig>Smoker
TC05003305.hg.1	CD74	0.00710972	0.0979568	0.83829	0.999976	Never>E-cig>Smoker
TC11000063.hg.1	CD81	2.55757e-07	3.75839e-05	0.787202	0.999976	Never>E-cig>Smoker
TC11000374.hg.1	CD82	0.00428599	0.0692652	0.848199	0.999976	Never>E-cig>Smoker
TC01000902.hg.1	CDC14A	4.01328e-05	0.00215418	0.908412	0.999976	Never>E-cig>Smoker
TC09001376.hg.1	CDC14B	1.70253e-06	0.000172801	0.0766571	0.999976	Smoker>E-cig>Never
TC19001165.hg.1	CDC37	0.000947689	0.0239013	0.481322	0.999976	Smoker>E-cig>Never
TC01003218.hg.1	CDC42SE1	0.00060458	0.0169821	0.86562	0.999976	Never>E-cig>Smoker
TC18000235.hg.1	CDH7	0.000274127	0.00943639	0.0860075	0.999976	Never>E-cig>Smoker
TC03001417.hg.1	CDHR4	0.000460605	0.0139495	0.228611	0.999976	Never>E-cig>Smoker
TC07003336.hg.1	CDK14	2.33275e-08	5.00854e-06	0.32807	0.999976	Never>E-cig>Smoker
TC09001536.hg.1	CDK5RAP2	1.14286e-09	3.9463e-07	0.387725	0.999976	Smoker>E-cig>Never
TC07001603.hg.1	CDK6	0.00215043	0.0424185	0.381675	0.999976	Smoker>E-cig>Never
TC05003407.hg.1	CDKL3	0.00622405	0.0896638	0.266202	0.999976	Smoker>Never>E-cig
TC14000316.hg.1	CDKN3	0.00197176	0.0399287	0.253321	0.999976	Smoker>E-cig>Never
TC11003400.hg.1	CDON	6.07848e-06	0.000479042	0.248927	0.999976	Never>E-cig>Smoker
TC11002427.hg.1	CDON	1.77669e-05	0.00110816	0.339237	0.999976	Never>E-cig>Smoker
TC17002888.hg.1	CDRT1	0.00250513	0.047405	0.0651923	0.999976	Never>E-cig>Smoker
TC19000583.hg.1	CEACAM5	4.88929e-08	9.04761e-06	0.576904	0.999976	Smoker>E-cig>Never
TC19000584.hg.1	CEACAM6	1.12207e-05	0.000770138	0.603214	0.999976	Smoker>E-cig>Never
TC19001576.hg.1	CEACAM8	0.000114626	0.00481114	0.605765	0.999976	Smoker>E-cig>Never
TC19002493.hg.1	CEACAM8	0.000724323	0.0194841	0.22545	0.999976	Smoker>E-cig>Never
TC15000752.hg.1	CEMIP	0.00211707	0.041958	0.0883681	0.999976	Smoker>E-cig>Never
TC19000973.hg.1	CENPBD1P1	0.00227587	0.044422	0.681172	0.999976	Smoker>E-cig>Never
TC16000634.hg.1	CENPN	0.0018315	0.0380962	0.377786	0.999976	Smoker>E-cig>Never
TC03002165.hg.1	CEP19	0.00108496	0.0264112	0.184103	0.999976	Smoker>E-cig>Never
TC09000357.hg.1	CEP78	0.00516451	0.0786631	0.103529	0.999976	Never>E-cig>Smoker
TC01000339.hg.1	CEP85	5.35028e-09	1.42224e-06	0.201211	0.999976	Smoker>E-cig>Never
TC19000144.hg.1	CERS4	0.000101117	0.00441092	0.774066	0.999976	Never>E-cig>Smoker
TC04001522.hg.1	CETN4P	0.00727492	0.0995316	0.719446	0.999976	Smoker>E-cig>Never
TC02000326.hg.1	CFAP36	1.41545e-05	0.000929981	0.793191	0.999976	Smoker>E-cig>Never
TC01006413.hg.1	CFAP45	0.00366937	0.0620403	0.561186	0.999976	Smoker>E-cig>Never
TC01004347.hg.1	CFAP57	0.000704613	0.0190799	0.450151	0.999976	Never>E-cig>Smoker
TC02002344.hg.1	CFC1B	0.000798517	0.0209991	0.979341	0.999976	Never>E-cig>Smoker
TC02000813.hg.1	CFC1B	0.00155836	0.0339816	0.885734	0.999976	Never>E-cig>Smoker
TC02001174.hg.1	CFLAR	0.00220744	0.0432375	0.971174	0.999976	Never>E-cig>Smoker
TC02004780.hg.1	CFLAR-AS1	0.00051985	0.0152985	0.976951	0.999976	E-cig>Never>Smoker
TC01001211.hg.1	CGN	0.00116288	0.0277221	0.562723	0.999976	Never>E-cig>Smoker
TC15002769.hg.1	CHD2	0.00380201	0.0637006	0.8676	0.999976	Never>E-cig>Smoker
TC11003470.hg.1	CHEK1	0.00704829	0.0973661	0.647289	0.999976	Smoker>E-cig>Never
TC01003718.hg.1	CHI3L1	1.25727e-05	0.000847301	0.691392	0.999976	Never>E-cig>Smoker
TC11002002.hg.1	CHKA	4.22698e-05	0.00225085	0.438231	0.999976	Never>E-cig>Smoker
TC20000235.hg.1	CHMP4B	0.000122555	0.00506774	0.787163	0.999976	Smoker>E-cig>Never
TC07001014.hg.1	CHPF2	0.00137806	0.0311448	0.576929	0.999976	Smoker>E-cig>Never
TC16001281.hg.1	CHST6	0.00348085	0.0595747	0.851561	0.999976	Smoker>E-cig>Never
TC18000876.hg.1	CHST9	0.000723554	0.0194813	0.166043	0.999976	Never>E-cig>Smoker
TC15001842.hg.1	CIB1	4.43056e-05	0.00233696	0.294538	0.999976	Smoker>E-cig>Never
TC16000158.hg.1	CIITA	0.00228637	0.0445441	0.701204	0.999976	Never>E-cig>Smoker
TC19000034.hg.1	CIRBP	3.58973e-05	0.00197754	0.199992	0.999976	Never>E-cig>Smoker
TC19001932.hg.1	CIRBP	5.55821e-05	0.0027911	0.1758	0.999976	Never>E-cig>Smoker
TC10000358.hg.1	CISD1	0.000465625	0.0140628	0.840682	0.999976	Smoker>E-cig>Never
TC04000529.hg.1	CISD2	0.000300901	0.0101488	0.682924	0.999976	Smoker>E-cig>Never
TC12002032.hg.1	CIT	7.24253e-05	0.00340226	0.0892623	0.999976	Smoker>E-cig>Never
TC12001917.hg.1	CKAP4	0.000265034	0.00918948	0.857347	0.999976	Smoker>E-cig>Never
TC14001538.hg.1	CKB	0.000317892	0.0105212	0.339924	0.999976	Never>E-cig>Smoker
TC01000823.hg.1	CLCA4	0.000215871	0.00797175	0.601385	0.999976	Never>E-cig>Smoker
TC01004511.hg.1	CLCA4	0.000533525	0.0155492	0.68928	0.999976	Never>E-cig>Smoker
TC03002108.hg.1	CLDN1	8.15518e-05	0.00373679	0.546279	0.999976	Never>E-cig>Smoker
TC13000335.hg.1	CLDN10	2.5546e-14	3.78612e-11	0.176774	0.999976	Smoker>E-cig>Never
TC13001240.hg.1	CLDN10	3.25998e-13	3.30878e-10	0.0994581	0.999976	Smoker>E-cig>Never
TC03001046.hg.1	CLDN16	0.00693344	0.0961834	0.119113	0.999976	Never>E-cig>Smoker
TC21000363.hg.1	CLDN8	0.00504196	0.0773947	0.664184	0.999976	Never>E-cig>Smoker
TC16000159.hg.1	CLEC16A	0.00131697	0.0301508	0.297773	0.999976	E-cig>Never>Smoker
TC02001967.hg.1	CLEC4F	0.00676301	0.0945578	0.97651	0.999976	Never>E-cig>Smoker
TC02000192.hg.1	CLIP4	7.03885e-12	4.62273e-09	0.872177	0.999976	Smoker>E-cig>Never
TC01003311.hg.1	CLK2	0.000526527	0.0154157	0.243963	0.999976	Never>E-cig>Smoker
TC05002093.hg.1	CLTB	0.00422677	0.0686067	0.391549	0.999976	Smoker>E-cig>Never
TC16000640.hg.1	CMIP	0.00660586	0.0930823	0.440567	0.999976	Smoker>E-cig>Never
TC03000161.hg.1	CMTM7	0.000310192	0.0103071	0.992425	0.999976	Never>E-cig>Smoker
TC05000392.hg.1	CMYA5	0.00634114	0.0909158	0.660903	0.999976	Never>E-cig>Smoker
TC16001144.hg.1	CNGB1	4.69149e-05	0.00244928	0.69818	0.999976	Smoker>E-cig>Never
TC11000658.hg.1	CNIH2	2.76967e-05	0.00161054	0.474565	0.999976	Smoker>E-cig>Never
TC06004140.hg.1	CNKSR3	0.00413772	0.0674772	0.0412893	0.999976	Smoker>E-cig>Never
TC19000027.hg.1	CNN2	0.00324932	0.0569806	0.226277	0.999976	Never>E-cig>Smoker
TC01002891.hg.1	CNN3	4.19663e-06	0.000361342	0.688729	0.999976	Never>E-cig>Smoker
TC02000587.hg.1	CNNM3	0.00333467	0.0579681	0.362225	0.999976	Never>E-cig>Smoker
TC12003214.hg.1	CNPY2	0.000127082	0.00520989	0.37135	0.999976	Smoker>E-cig>Never
TC03000007.hg.1	CNTN4	0.000208381	0.00779833	0.551951	0.999976	Never>E-cig>Smoker
TC09001092.hg.1	CNTNAP3	0.000157289	0.00624199	0.858293	0.999976	Smoker>E-cig>Never
TC09001141.hg.1	CNTNAP3B	0.000355952	0.0115414	0.651623	0.999976	Smoker>E-cig>Never
TC09000274.hg.1	CNTNAP3B	0.000370631	0.0117779	0.618644	0.999976	Smoker>E-cig>Never
TC09000253.hg.1	CNTNAP3B	0.000436253	0.0134177	0.646849	0.999976	Smoker>E-cig>Never
TC09001097.hg.1	CNTNAP3P2	0.00312434	0.05531	0.861477	0.999976	Smoker>E-cig>Never
TC11002071.hg.1	COA4	0.00193891	0.0395986	0.962339	0.999976	Smoker>E-cig>Never
TC01001934.hg.1	COA6	2.38255e-10	1.03638e-07	0.262136	0.999976	Smoker>E-cig>Never
TC06001826.hg.1	COL21A1	0.000123253	0.00509032	0.913826	0.999976	Smoker>E-cig>Never
TC0X000532.hg.1	COL4A5	0.00024844	0.00874244	0.410107	0.999976	Never>E-cig>Smoker
TC0X001822.hg.1	COL4A5	0.00036448	0.0116649	0.443875	0.999976	Never>E-cig>Smoker
TC11002277.hg.1	COLCA1	0.00022023	0.00807045	0.78653	0.999976	Smoker>E-cig>Never
TC11003338.hg.1	COLCA1	0.00454181	0.072302	0.676922	0.999976	Smoker>E-cig>Never
TC09001404.hg.1	CORO2A	0.000532389	0.015533	0.521305	0.999976	Never>E-cig>Smoker
TC15001652.hg.1	COX5A	1.27728e-05	0.00085734	0.908546	0.999976	Smoker>E-cig>Never
TC06001880.hg.1	COX7A2	0.000387946	0.0121639	0.657209	0.999976	Smoker>E-cig>Never
TC06003719.hg.1	COX7A2	0.00352525	0.0600584	0.522252	0.999976	Smoker>E-cig>Never
TC04000829.hg.1	CPE	0.00173083	0.0366218	0.481753	0.999976	Smoker>E-cig>Never
TC10001526.hg.1	CPEB3	0.0016353	0.0351557	0.636795	0.999976	Never>E-cig>Smoker
TC08000591.hg.1	CPQ	0.00150388	0.0331388	0.966131	0.999976	Never>E-cig>Smoker
TC08002026.hg.1	CPQ	0.00433021	0.0698046	0.484381	0.999976	Never>E-cig>Smoker
TC11002009.hg.1	CPT1A	4.16378e-06	0.000359437	0.143363	0.999976	Smoker>E-cig>Never
TC11000394.hg.1	CREB3L1	0.000239638	0.00856712	0.879554	0.999976	Smoker>E-cig>Never
TC01001265.hg.1	CREB3L4	5.93364e-06	0.000471431	0.766807	0.999976	Smoker>E-cig>Never
TC02000230.hg.1	CRIM1	2.51125e-08	5.32353e-06	0.863172	0.999976	Never>E-cig>Smoker
TC05003110.hg.1	CRSP8P	0.000374986	0.0118825	0.606937	0.999976	Never>E-cig>Smoker
TC11000388.hg.1	CRY2	0.00392503	0.0650521	0.587697	0.999976	Never>E-cig>Smoker
TC08002245.hg.1	CSGALNACT1	0.0020907	0.0416078	0.555634	0.999976	Never>E-cig>Smoker
TC03000630.hg.1	CSTA	6.19274e-06	0.000484626	0.990071	0.999976	Smoker>E-cig>Never
TC21000509.hg.1	CSTB	6.33821e-05	0.0031023	0.172421	0.999976	Smoker>E-cig>Never
TC14002296.hg.1	CTAGE5	0.00127416	0.0295546	0.760473	0.999976	Smoker>E-cig>Never
TC17001111.hg.1	CTC1	0.00151044	0.033196	0.817632	0.999976	E-cig>Never>Smoker
TC05000065.hg.1	CTD-2201E9.1	0.00513389	0.0783035	0.859252	0.999976	E-cig>Never>Smoker
TC18000264.hg.1	CTDP1	0.00478205	0.0748458	0.810047	0.999976	Smoker>E-cig>Never
TC12001637.hg.1	CTDSP2	0.000320858	0.0105984	0.549687	0.999976	Never>E-cig>Smoker
TC06002112.hg.1	CTGF	4.5942e-05	0.00240435	0.49447	0.999976	Smoker>E-cig>Never
TC05000702.hg.1	CTNNA1	4.70199e-05	0.00244928	0.14266	0.999976	Smoker>E-cig>Never
TC09001457.hg.1	CTNNAL1	1.78211e-06	0.000179832	0.510325	0.999976	Never>E-cig>Smoker
TC17000034.hg.1	CTNS	1.40776e-06	0.000148276	0.230443	0.999976	Smoker>E-cig>Never
TC01000520.hg.1	CTPS1	0.00338647	0.058478	0.0212685	0.999976	Smoker>E-cig>Never
TC11000727.hg.1	CTTN	0.00149163	0.0329773	0.631931	0.999976	Smoker>E-cig>Never
TC07001798.hg.1	CTTNBP2	2.6988e-05	0.00158154	0.0649017	0.999976	Smoker>E-cig>Never
TC19001772.hg.1	CTU1	0.00237696	0.0456763	0.847081	0.999976	Smoker>E-cig>Never
TC16000488.hg.1	CX3CL1	3.83632e-13	3.77923e-10	0.290987	0.999976	Never>E-cig>Smoker
TC03001304.hg.1	CX3CR1	2.32211e-07	3.50346e-05	0.658996	0.999976	Never>E-cig>Smoker
TC11001852.hg.1	CYB561A3	1.13578e-06	0.000125137	0.461803	0.999976	Smoker>E-cig>Never
TC11001372.hg.1	CYB5R2	1.82915e-06	0.00018343	0.761057	0.999976	Smoker>E-cig>Never
TC05000866.hg.1	CYFIP2	0.00522323	0.0791615	0.271387	0.999976	Never>E-cig>Smoker
TC10000766.hg.1	CYP17A1-AS1	0.00219957	0.0431549	0.862792	0.999976	Never>E-cig>Smoker
TC15001647.hg.1	CYP1A1	4.99773e-09	1.34104e-06	0.961699	0.999976	Smoker>E-cig>Never
TC15000684.hg.1	CYP1A2	0.00274945	0.0510017	0.534479	0.999976	Smoker>E-cig>Never
TC02001749.hg.1	CYP1B1	8.26639e-15	1.54038e-11	0.838179	0.999976	Smoker>E-cig>Never
TC02001750.hg.1	CYP1B1	3.1307e-13	3.27686e-10	0.916349	0.999976	Smoker>E-cig>Never
TC02000241.hg.1	CYP1B1-AS1	1.20407e-08	2.76226e-06	0.889623	0.999976	Smoker>E-cig>Never
TC19000572.hg.1	CYP2A13	5.17683e-10	2.11455e-07	0.894662	0.999976	Never>E-cig>Smoker
TC19001549.hg.1	CYP2A6	2.51472e-07	3.74388e-05	0.618696	0.999976	Never>E-cig>Smoker
TC19002702.hg.1	CYP2A7	1.27281e-08	2.89302e-06	0.887609	0.999976	Never>E-cig>Smoker
TC19002703.hg.1	CYP2A7P1	7.20947e-05	0.00339626	0.566619	0.999976	Never>E-cig>Smoker
TC19000573.hg.1	CYP2F1	0.000350117	0.0114185	0.389092	0.999976	Never>E-cig>Smoker
TC01002717.hg.1	CYP2J2	0.000362735	0.0116527	0.719563	0.999976	Never>E-cig>Smoker
TC06001772.hg.1	CYP39A1	0.00208418	0.0415069	0.624266	0.999976	Smoker>E-cig>Never
TC07003299.hg.1	CYP3A5	0.00214006	0.0422637	0.901241	0.999976	Smoker>Never>E-cig
TC07003079.hg.1	CYP3A5	0.00636824	0.0911529	0.755255	0.999976	Smoker>E-cig>Never
TC19001262.hg.1	CYP4F11	8.1219e-09	1.94311e-06	0.750136	0.999976	Smoker>E-cig>Never
TC19001261.hg.1	CYP4F2	5.08469e-12	3.54806e-09	0.910684	0.999976	Smoker>E-cig>Never
TC19002362.hg.1	CYP4F24P	8.95269e-09	2.09693e-06	0.653415	0.999976	Smoker>E-cig>Never
TC19001258.hg.1	CYP4F24P	1.94812e-07	3.02085e-05	0.865863	0.999976	Smoker>E-cig>Never
TC19000274.hg.1	CYP4F3	5.19087e-12	3.54822e-09	0.702168	0.999976	Smoker>E-cig>Never
TC02000824.hg.1	CYP4F30P	3.14667e-05	0.00178333	0.988022	0.999976	Never>E-cig>Smoker
TC02002332.hg.1	CYP4F30P	0.000232906	0.00842332	0.789607	0.999976	Never>E-cig>Smoker
TC19000273.hg.1	CYP4F8	9.8857e-06	0.000691256	0.58022	0.999976	Smoker>E-cig>Never
TC01000593.hg.1	CYP4X1	5.69654e-10	2.29879e-07	0.52997	0.999976	Never>E-cig>Smoker
TC01000594.hg.1	CYP4Z1	1.02142e-07	1.71058e-05	0.939754	0.999976	Never>E-cig>Smoker
TC01002624.hg.1	CYP4Z2P	1.5188e-06	0.000157983	0.656312	0.999976	Never>E-cig>Smoker
TC0X001177.hg.1	CYSLTR1	0.000506999	0.0150222	0.246007	0.999976	Never>E-cig>Smoker
TC6_ssto_hap7000175.hg.1	DAXX	0.000112492	0.00475132	0.475759	0.999976	Smoker>E-cig>Never
TC09001881.hg.1	DCAF12	0.000156677	0.00622508	0.203867	0.999976	Smoker>E-cig>Never
TC09001028.hg.1	DCAF12	0.00023332	0.00842332	0.131635	0.999976	Smoker>E-cig>Never
TC14001256.hg.1	DCAF5	0.000654436	0.0179964	0.556611	0.999976	Never>E-cig>Smoker
TC01000423.hg.1	DCDC2B	0.000551089	0.0158712	0.149011	0.999976	Never>E-cig>Smoker
TC10001673.hg.1	DCLRE1A	0.00185834	0.0383744	0.454547	0.999976	Smoker>E-cig>Never
TC12001627.hg.1	DCTN2	8.25021e-05	0.00377503	0.843887	0.999976	Smoker>E-cig>Never
TC11002240.hg.1	DCUN1D5	0.000803321	0.0210865	0.366505	0.999976	Smoker>E-cig>Never
TC19000332.hg.1	DDA1	0.000157715	0.00624408	0.69107	0.999976	Smoker>E-cig>Never
TC11001851.hg.1	DDB1	2.94107e-05	0.00169423	0.813592	0.999976	Smoker>E-cig>Never
TC22000791.hg.1	DDX17	0.000311766	0.0103456	0.676236	0.999976	Never>E-cig>Smoker
TC06004114.hg.1	DDX39B	4.0206e-05	0.00215465	0.834903	0.999976	Never>E-cig>Smoker
TC6_ssto_hap7000204.hg.1	DDX39B	4.70043e-05	0.00244928	0.913684	0.999976	Never>E-cig>Smoker
TC6_apd_hap1000079.hg.1	DDX39B	7.49005e-05	0.00348917	0.554608	0.999976	Never>E-cig>Smoker
TC6_cox_hap2000252.hg.1	DDX39B	7.55786e-05	0.00351588	0.81001	0.999976	Never>E-cig>Smoker
TC6_dbb_hap3000231.hg.1	DDX39B	7.70235e-05	0.00357812	0.788874	0.999976	Never>E-cig>Smoker
TC6_mann_hap4000202.hg.1	DDX39B	7.84691e-05	0.00363017	0.765469	0.999976	Never>E-cig>Smoker
TC6_qbl_hap6000230.hg.1	DDX39B	8.05795e-05	0.00370732	0.807363	0.999976	Never>E-cig>Smoker
TC6_mcf_hap5000216.hg.1	DDX39B	9.93129e-05	0.00436384	0.781214	0.999976	Never>E-cig>Smoker
TC08000906.hg.1	DEFB1	1.70788e-09	5.50035e-07	0.857317	0.999976	Smoker>E-cig>Never
TC08000698.hg.1	DEPTOR	0.000870476	0.0223587	0.586646	0.999976	Never>E-cig>Smoker
TC07001897.hg.1	DGKI	0.00428694	0.0692652	0.0685789	0.999976	Smoker>E-cig>Never
TC13000681.hg.1	DHRS12	0.000201907	0.0076242	0.861301	0.999976	Never>E-cig>Smoker
TC01002211.hg.1	DHRS3	4.0769e-08	7.93905e-06	0.120825	0.999976	Smoker>E-cig>Never
TC01005268.hg.1	DHRS3	1.37049e-05	0.000908976	0.0832742	0.999976	Smoker>E-cig>Never
TC06003301.hg.1	DHX16	0.00092434	0.0234591	0.110963	0.999976	Smoker>E-cig>Never
TC20001212.hg.1	DHX35	4.56503e-06	0.000384174	0.176415	0.999976	Smoker>E-cig>Never
TC20000294.hg.1	DHX35	1.64426e-05	0.00104107	0.159022	0.999976	Smoker>E-cig>Never
TC05001870.hg.1	DIAPH1	0.00414888	0.0675889	0.890087	0.999976	Smoker>E-cig>Never
TC0X001204.hg.1	DIAPH2-AS1	5.36366e-05	0.00273441	0.145447	0.999976	Smoker>E-cig>Never
TC0X002148.hg.1	DIAPH2-AS1	8.94765e-05	0.00401733	0.147828	0.999976	Smoker>E-cig>Never
TC01000658.hg.1	DIO1	0.00123994	0.028921	0.93517	0.999976	Smoker>E-cig>Never
TC01005106.hg.1	DISC1	0.00565597	0.0838235	0.836887	0.999976	E-cig>Never>Smoker
TC11001425.hg.1	DKK3	0.00710223	0.0979342	0.815327	0.999976	Smoker>E-cig>Never
TC13000208.hg.1	DLEU7-AS1	0.00135656	0.0308253	0.411142	0.999976	Smoker>E-cig>Never
TC17001077.hg.1	DLG4	0.000374884	0.0118825	0.508115	0.999976	Smoker>E-cig>Never
TC18000020.hg.1	DLGAP1-AS1	0.00210886	0.0418581	0.014595	0.999976	Smoker>E-cig>Never
TC10000890.hg.1	DMBT1	0.000226779	0.00824728	0.980407	0.999976	Never>E-cig>Smoker
TC09000009.hg.1	DMRT3	9.18838e-05	0.00409806	0.399539	0.999976	Never>E-cig>Smoker
TC15001441.hg.1	DMXL2	0.00257836	0.0485167	0.220014	0.999976	Never>E-cig>Smoker
TC12002634.hg.1	DNAH10	0.00490128	0.0760751	0.988202	0.999976	Never>E-cig>Smoker
TC07000133.hg.1	DNAH11	0.000360534	0.0116204	0.676322	0.999976	Never>E-cig>Smoker
TC05001171.hg.1	DNAH5	5.92946e-08	1.06775e-05	0.337623	0.999976	Never>E-cig>Smoker
TC02002884.hg.1	DNAJB3	4.34626e-05	0.00229974	0.269008	0.999976	Smoker>E-cig>Never
TC07000699.hg.1	DNAJB9	8.55401e-07	0.00010124	0.911809	0.999976	Smoker>E-cig>Never
TC10001097.hg.1	DNAJC1	0.00010485	0.00451975	0.248312	0.999976	Smoker>E-cig>Never
TC02001089.hg.1	DNAJC10	1.51472e-05	0.00097378	0.661026	0.999976	Smoker>E-cig>Never
TC10001340.hg.1	DNAJC12	8.71725e-08	1.50503e-05	0.271484	0.999976	Smoker>E-cig>Never
TC15001243.hg.1	DNAJC17	7.30898e-06	0.000541608	0.330518	0.999976	Never>E-cig>Smoker
TC09002183.hg.1	DNAJC25	0.00332022	0.0578603	0.794913	0.999976	Smoker>E-cig>Never
TC22001496.hg.1	DNAL4	0.000117403	0.00489701	0.902252	0.999976	Smoker>E-cig>Never
TC03001498.hg.1	DNASE1L3	6.01789e-06	0.000475385	0.405446	0.999976	Smoker>E-cig>Never
TC02002847.hg.1	DNER	7.20465e-07	8.87178e-05	0.302231	0.999976	Smoker>E-cig>Never
TC15000979.hg.1	DNM1P46	0.00143304	0.031961	0.414126	0.999976	Never>E-cig>Smoker
TC01001498.hg.1	DNM3	0.000612797	0.0171365	0.646545	0.999976	Smoker>E-cig>Never
TC10001585.hg.1	DNMBP	0.00663965	0.0934405	0.363309	0.999976	E-cig>Never>Smoker
TC01002881.hg.1	DNTTIP2	0.00157945	0.0343297	0.595276	0.999976	Smoker>E-cig>Never
TC10000918.hg.1	DOCK1	0.00413489	0.0674772	0.569651	0.999976	Never>E-cig>Smoker
TC07001761.hg.1	DOCK4	0.000671567	0.0183692	0.731758	0.999976	Never>E-cig>Smoker
TC13001249.hg.1	DOCK9-AS2	0.00102455	0.0254384	0.349244	0.999976	Never>E-cig>Smoker
TC21001058.hg.1	DONSON	0.00521841	0.07916	0.915727	0.999976	Smoker>E-cig>Never
TC11000624.hg.1	DPF2	0.00507647	0.0778175	0.879337	0.999976	Never>E-cig>Smoker
TC02002240.hg.1	DPP10-AS1	0.00687895	0.0956428	0.915833	0.999976	Smoker>E-cig>Never
TC02002478.hg.1	DPP4	2.02088e-06	0.000199081	0.268485	0.999976	Never>E-cig>Smoker
TC07001274.hg.1	DPY19L1	0.00608504	0.0880399	0.281797	0.999976	Smoker>E-cig>Never
TC02005024.hg.1	DPY30	0.000375743	0.0118952	0.318826	0.999976	Smoker>E-cig>Never
TC01002903.hg.1	DPYD	0.000178409	0.00693565	0.647202	0.999976	Never>E-cig>Smoker
TC08000203.hg.1	DPYSL2	4.09827e-05	0.00218927	0.144559	0.999976	Never>E-cig>Smoker
TC08001847.hg.1	DPYSL2	0.000307085	0.0102306	0.41135	0.999976	Never>E-cig>Smoker
TC05001909.hg.1	DPYSL3	3.44061e-06	0.000309785	0.190821	0.999976	Smoker>E-cig>Never
TC05002083.hg.1	DRD1	0.00640428	0.0915513	0.888148	0.999976	Never>E-cig>Smoker
TC11002337.hg.1	DSCAML1	0.00671972	0.0941649	0.714864	0.999976	Never>E-cig>Smoker
TC18000127.hg.1	DSG3	0.00220347	0.0431849	0.660101	0.999976	Smoker>E-cig>Never
TC20000109.hg.1	DSTN	0.00013036	0.00532471	0.258908	0.999976	Smoker>E-cig>Never
TC12002209.hg.1	DSTNP2	0.00313315	0.0553783	0.698478	0.999976	Smoker>E-cig>Never
TC01003743.hg.1	DSTYK	0.000758779	0.0202184	0.422601	0.999976	Never>E-cig>Smoker
TC18000141.hg.1	DTNA	6.43749e-08	1.14083e-05	0.688857	0.999976	Smoker>E-cig>Never
TC17000448.hg.1	DUSP14	1.56757e-05	0.00100199	0.249482	0.999976	Smoker>E-cig>Never
TC12001255.hg.1	DUSP16	0.00281654	0.0516916	0.154746	0.999976	Never>E-cig>Smoker
TC02002102.hg.1	DUSP2	0.000853864	0.0219995	0.957434	0.999976	Never>E-cig>Smoker
TC02001466.hg.1	DUSP28	7.79912e-05	0.00361305	0.489898	0.999976	Smoker>E-cig>Never
TC13001642.hg.1	DZIP1	2.07362e-11	1.21849e-08	0.53837	0.999976	Smoker>E-cig>Never
TC10001790.hg.1	ECHS1	0.00418967	0.0681539	0.49434	0.999976	Smoker>E-cig>Never
TC06001235.hg.1	ECI2	0.000521279	0.0153155	0.390242	0.999976	Never>E-cig>Smoker
TC06003424.hg.1	ECI2	0.00125787	0.0292848	0.455923	0.999976	Never>E-cig>Smoker
TC01001953.hg.1	EDARADD	0.000916377	0.0233586	0.912809	0.999976	Never>E-cig>Smoker
TC01003623.hg.1	EDEM3	0.000847052	0.0218744	0.726261	0.999976	Smoker>E-cig>Never
TC16000243.hg.1	EEF2K	0.00125816	0.0292848	0.97866	0.999976	E-cig>Never>Smoker
TC17000346.hg.1	EFCAB5	0.00031551	0.0104527	0.298609	0.999976	Smoker>E-cig>Never
TC17002152.hg.1	EFCAB5	0.000467552	0.0141083	0.0713765	0.999976	Smoker>E-cig>Never
TC02001867.hg.1	EFEMP1	0.000840235	0.0218295	0.992394	0.999976	Never>E-cig>Smoker
TC04000568.hg.1	EGF	5.06223e-10	2.09326e-07	0.51899	0.999976	Smoker>E-cig>Never
TC07002321.hg.1	EGFR	0.00133907	0.0305315	0.817072	0.999976	Never>E-cig>Smoker
TC07000328.hg.1	EGFR	0.00271468	0.0506187	0.930783	0.999976	Never>E-cig>Smoker
TC12000811.hg.1	EID3	9.37834e-07	0.000108691	0.983849	0.999976	Smoker>E-cig>Never
TC02002074.hg.1	EIF2AK3	3.19275e-05	0.00180638	0.408563	0.999976	Smoker>E-cig>Never
TC02001404.hg.1	EIF4E2	0.00277875	0.0512509	0.822626	0.999976	Smoker>E-cig>Never
TC03001000.hg.1	EIF4G1	0.000333281	0.0109333	0.29435	0.999976	Smoker>E-cig>Never
TC01002320.hg.1	EIF4G3	0.000558018	0.0160019	0.165096	0.999976	Smoker>E-cig>Never
TC20001747.hg.1	EIF6	0.000400382	0.0124864	0.77475	0.999976	Smoker>E-cig>Never
TC15002773.hg.1	ELL3	1.36303e-05	0.000905818	0.224526	0.999976	Smoker>E-cig>Never
TC11000972.hg.1	ELMOD1	8.91472e-08	1.51568e-05	0.619008	0.999976	Smoker>E-cig>Never
TC07002404.hg.1	ELN	0.00645949	0.0919399	0.509629	0.999976	Never>E-cig>Smoker
TC05002988.hg.1	EMB	5.11201e-06	0.000423028	0.736786	0.999976	Never>E-cig>Smoker
TC05001331.hg.1	EMB	0.000527	0.015416	0.851809	0.999976	Never>E-cig>Smoker
TC01004676.hg.1	EMBP1	0.00237132	0.0455942	0.931565	0.999976	Never>E-cig>Smoker
TC01001053.hg.1	EMBP1	0.00573035	0.0845145	0.97561	0.999976	Never>E-cig>Smoker
TC03003327.hg.1	EMC3	0.00515731	0.0785891	0.130384	0.999976	Smoker>E-cig>Never
TC14001424.hg.1	EML5	0.00181767	0.0379558	0.899158	0.999976	Never>E-cig>Smoker
TC19000699.hg.1	EMP3	0.00436784	0.070254	0.610951	0.999976	Never>E-cig>Smoker
TC04000389.hg.1	ENAM	0.000462006	0.0139787	0.78626	0.999976	Smoker>E-cig>Never
TC06000985.hg.1	ENPP1	0.00116131	0.0277182	0.0812946	0.999976	Never>E-cig>Smoker
TC03000208.hg.1	ENTPD3	0.00673964	0.0943719	0.955814	0.999976	Smoker>E-cig>Never
TC03001306.hg.1	ENTPD3-AS1	0.00627695	0.0902706	0.503749	0.999976	Never>E-cig>Smoker
TC08002612.hg.1	ENTPD4	0.00103448	0.02559	0.690591	0.999976	Smoker>E-cig>Never
TC10002945.hg.1	ENTPD7	0.00544002	0.0815979	0.098216	0.999976	Smoker>E-cig>Never
TC02000281.hg.1	EPAS1	5.51314e-05	0.00278844	0.395365	0.999976	Never>E-cig>Smoker
TC06002106.hg.1	EPB41L2	6.28638e-09	1.59512e-06	0.649925	0.999976	Never>E-cig>Smoker
TC18000300.hg.1	EPB41L3	0.000948374	0.0239013	0.23068	0.999976	Never>E-cig>Smoker
TC06001952.hg.1	EPHA7	8.12932e-08	1.41079e-05	0.323739	0.999976	Smoker>E-cig>Never
TC03000730.hg.1	EPHB1	0.00122928	0.0288735	0.43713	0.999976	Smoker>E-cig>Never
TC19001251.hg.1	EPHX3	0.000251941	0.00883613	0.752527	0.999976	Never>E-cig>Smoker
TC17000234.hg.1	EPN2	0.00203916	0.0409471	0.69107	0.999976	E-cig>Never>Smoker
TC19002520.hg.1	ERCC1	0.00115371	0.0276073	0.523285	0.999976	Smoker>E-cig>Never
TC19001620.hg.1	ERCC1	0.00167979	0.0359048	0.421907	0.999976	Smoker>E-cig>Never
TC05000952.hg.1	ERGIC1	6.72034e-05	0.0032248	0.850999	0.999976	Smoker>E-cig>Never
TC09000893.hg.1	ERMP1	7.69124e-06	0.000558175	0.255894	0.999976	Smoker>E-cig>Never
TC12001277.hg.1	ERP27	1.14918e-05	0.000783925	0.216368	0.999976	Never>E-cig>Smoker
TC01002166.hg.1	ERRFI1	0.00392519	0.0650521	0.152474	0.999976	Never>E-cig>Smoker
TC11001502.hg.1	ERV9-1	0.00386513	0.0644394	0.09781	0.999976	Never>E-cig>Smoker
TC01003321.hg.1	ERVK-7	0.00662134	0.093222	0.457707	0.999976	Smoker>E-cig>Never
TC01006110.hg.1	ESRRG	0.00520966	0.0790631	0.907636	0.999976	Never>E-cig>Smoker
TC19002500.hg.1	ETHE1	0.00273067	0.0507511	0.301248	0.999976	Smoker>E-cig>Never
TC19001588.hg.1	ETHE1	0.00352955	0.0601011	0.28031	0.999976	Smoker>E-cig>Never
TC12002285.hg.1	ETNK1	0.000302322	0.0101769	0.446563	0.999976	Never>E-cig>Smoker
TC11002439.hg.1	ETS1	0.00218824	0.0430376	0.488297	0.999976	Never>E-cig>Smoker
TC21000117.hg.1	EVA1C	0.000968429	0.0242675	0.883352	0.999976	E-cig>Never>Smoker
TC09000740.hg.1	EXOSC2	0.00484831	0.0755965	0.341273	0.999976	E-cig>Never>Smoker
TC17001540.hg.1	EZH1	0.000574484	0.0163204	0.360603	0.999976	Never>E-cig>Smoker
TC0X001547.hg.1	F8	3.30094e-06	0.000299625	0.628076	0.999976	Never>E-cig>Smoker
TC16001271.hg.1	FA2H	2.43693e-05	0.00145754	0.501228	0.999976	Smoker>E-cig>Never
TC08000518.hg.1	FABP5	0.000756269	0.0201676	0.0306077	0.999976	Never>E-cig>Smoker
TC13000729.hg.1	FABP5P1	0.00334447	0.0580413	0.031848	0.999976	Never>E-cig>Smoker
TC11001833.hg.1	FABP5P7	0.00251362	0.0474851	0.0308195	0.999976	Never>E-cig>Smoker
TC05000893.hg.1	FABP6	0.000204208	0.00766787	0.791144	0.999976	Never>E-cig>Smoker
TC03001501.hg.1	FAM107A	2.56849e-06	0.000239635	0.669608	0.999976	Never>E-cig>Smoker
TC02001494.hg.1	FAM110C	1.03934e-08	2.4008e-06	0.00162613	0.544655	Smoker>E-cig>Never
TC04000222.hg.1	FAM114A1	8.81326e-10	3.24386e-07	0.191269	0.999976	Smoker>E-cig>Never
TC04001986.hg.1	FAM114A1	4.6218e-09	1.26887e-06	0.163757	0.999976	Smoker>E-cig>Never
TC09000448.hg.1	FAM120A	0.00255725	0.0481735	0.312509	0.999976	Smoker>E-cig>Never
TC09000317.hg.1	FAM122A	5.99795e-05	0.00296743	0.25824	0.999976	Never>E-cig>Smoker
TC06000715.hg.1	FAM135A	0.00384448	0.064223	0.583446	0.999976	Smoker>E-cig>Never
TC02001961.hg.1	FAM136A	0.00649127	0.0920812	0.0883136	0.999976	Smoker>E-cig>Never
TC01001831.hg.1	FAM177B	4.50841e-07	6.08889e-05	0.416838	0.999976	Smoker>E-cig>Never
TC20000736.hg.1	FAM182B	0.00129075	0.029636	0.965193	0.999976	Smoker>E-cig>Never
TC09000320.hg.1	FAM189A2	0.000294045	0.00997847	0.0643089	0.999976	Never>E-cig>Smoker
TC04002911.hg.1	FAM193A	0.00022332	0.00814803	0.0709089	0.999976	Never>E-cig>Smoker
TC17001824.hg.1	FAM20A	4.24668e-06	0.000362858	0.833085	0.999976	Never>E-cig>Smoker
TC17002760.hg.1	FAM20A	4.64769e-06	0.00039015	0.380143	0.999976	Never>E-cig>Smoker
TC01001545.hg.1	FAM20B	0.00257562	0.0484924	0.117302	0.999976	Smoker>E-cig>Never
TC20001302.hg.1	FAM210B	0.00297907	0.0536168	0.121528	0.999976	Smoker>E-cig>Never
TC20000427.hg.1	FAM210B	0.00417173	0.0678951	0.0251956	0.999976	Smoker>E-cig>Never
TC10000581.hg.1	FAM213A	0.00150746	0.033174	0.831535	0.999976	Smoker>E-cig>Never
TC01004146.hg.1	FAM213B	0.000905955	0.0231457	0.420457	0.999976	Never>E-cig>Smoker
TC15001651.hg.1	FAM219B	4.07151e-05	0.00217845	0.411268	0.999976	Smoker>E-cig>Never
TC10000310.hg.1	FAM21A	0.000194627	0.00740776	0.485383	0.999976	Never>E-cig>Smoker
TC10000341.hg.1	FAM21A	0.000217679	0.00802968	0.507498	0.999976	Never>E-cig>Smoker
TC10000294.hg.1	FAM21C	0.000844192	0.0218295	0.591822	0.999976	Never>E-cig>Smoker
TC10001286.hg.1	FAM21EP	0.00178691	0.0375005	0.345199	0.999976	Never>E-cig>Smoker
TC06000895.hg.1	FAM229B	0.000545883	0.015764	0.572925	0.999976	Smoker>E-cig>Never
TC21000187.hg.1	FAM3B	1.69895e-09	5.50035e-07	0.420543	0.999976	Smoker>E-cig>Never
TC03001502.hg.1	FAM3D	0.00277049	0.051183	0.386979	0.999976	Smoker>E-cig>Never
TC06001903.hg.1	FAM46A	1.35214e-05	0.000900366	0.586628	0.999976	Never>E-cig>Smoker
TC01001030.hg.1	FAM46C	3.31538e-05	0.00184997	0.676308	0.999976	Never>E-cig>Smoker
TC02001600.hg.1	FAM49A	0.00387517	0.0644783	0.475021	0.999976	Never>E-cig>Smoker
TC06001329.hg.1	FAM65B	0.00243743	0.0463525	0.125754	0.999976	Never>E-cig>Smoker
TC15000455.hg.1	FAM81A	0.00108896	0.0264878	0.0930595	0.999976	Smoker>E-cig>Never
TC08000714.hg.1	FAM83A	0.00654797	0.0926173	0.8481	0.999976	Smoker>E-cig>Never
TC20000293.hg.1	FAM83D	0.000614654	0.017156	0.139011	0.999976	Smoker>E-cig>Never
TC22000321.hg.1	FAM83F	0.00200841	0.0405484	0.151358	0.999976	E-cig>Smoker>Never
TC02000087.hg.1	FAM84A	4.24674e-06	0.000362858	0.305258	0.999976	Smoker>E-cig>Never
TC02004059.hg.1	FAM84A	0.00311567	0.0552276	0.182671	0.999976	Smoker>E-cig>Never
TC11001996.hg.1	FAM86C2P	0.00648336	0.0920812	0.365242	0.999976	Never>E-cig>Smoker
TC03002975.hg.1	FAM86DP	0.00464372	0.0733355	0.951693	0.999976	Never>E-cig>Smoker
TC08000565.hg.1	FAM92A1	0.000256232	0.00894916	0.618158	0.999976	Smoker>E-cig>Never
TC02002301.hg.1	FAR2P1	0.00116799	0.027818	0.600115	0.999976	Never>E-cig>Smoker
TC02002331.hg.1	FAR2P2	0.000384097	0.0120924	0.174052	0.999976	Never>E-cig>Smoker
TC02000825.hg.1	FAR2P2	0.00192628	0.0394129	0.949588	0.999976	Never>E-cig>Smoker
TC05001149.hg.1	FASTKD3	0.00455159	0.0723758	0.825724	0.999976	Smoker>E-cig>Never
TC15001335.hg.1	FBN1	1.7888e-06	0.000179922	0.179582	0.999976	Never>E-cig>Smoker
TC05000088.hg.1	FBXL7	2.54367e-07	3.75839e-05	0.358618	0.999976	Smoker>E-cig>Never
TC08002615.hg.1	FBXO16	4.72675e-07	6.30749e-05	0.456685	0.999976	Smoker>E-cig>Never
TC06002196.hg.1	FBXO30	3.47772e-06	0.000311451	0.123365	0.999976	Smoker>E-cig>Never
TC08001590.hg.1	FBXO32	1.01407e-05	0.000706141	0.701739	0.999976	Smoker>E-cig>Never
TC08002503.hg.1	FBXO32	0.00411651	0.0673234	0.88551	0.999976	Smoker>E-cig>Never
TC11000319.hg.1	FBXO3-AS1	0.00466325	0.0735708	0.117853	0.999976	E-cig>Smoker>Never
TC01002262.hg.1	FBXO42	0.000561073	0.0160483	0.734892	0.999976	Never>E-cig>Smoker
TC17000221.hg.1	FBXW10	8.43743e-06	0.000601284	0.0884895	0.999976	Never>E-cig>Smoker
TC09001538.hg.1	FBXW2	0.00120553	0.0285157	0.578166	0.999976	Smoker>E-cig>Never
TC19001527.hg.1	FCGBP	0.0028712	0.0522652	0.442237	0.999976	Never>E-cig>Smoker
TC19002479.hg.1	FCGBP	0.00293652	0.0530792	0.434272	0.999976	Never>E-cig>Smoker
TC18000536.hg.1	FECH	1.12556e-09	3.92704e-07	0.406761	0.999976	Smoker>E-cig>Never
TC15000628.hg.1	FEM1B	0.00695329	0.0963564	0.263865	0.999976	Never>E-cig>Smoker
TC14001144.hg.1	FERMT2	0.00272938	0.0507511	0.171972	0.999976	Never>E-cig>Smoker
TC12001829.hg.1	FGD6	0.00131225	0.0300633	0.983215	0.999976	Smoker>E-cig>Never
TC12003015.hg.1	FGD6	0.00433047	0.0698046	0.774646	0.999976	Smoker>E-cig>Never
TC03002115.hg.1	FGF12	0.00545681	0.081813	0.364265	0.999976	Smoker>E-cig>Never
TC04001058.hg.1	FGFBP1	0.00010827	0.0046255	0.546336	0.999976	Smoker>E-cig>Never
TC04001856.hg.1	FGFR3	0.0011328	0.0272964	0.803387	0.999976	Never>E-cig>Smoker
TC04000029.hg.1	FGFR3	0.0042298	0.0686067	0.970896	0.999976	Never>E-cig>Smoker
TC01000698.hg.1	FGGY	0.0037806	0.0634724	0.392397	0.999976	Never>E-cig>Smoker
TC03001506.hg.1	FHIT	0.000359938	0.0116144	0.297921	0.999976	Never>E-cig>Smoker
TC18000150.hg.1	FHOD3	0.00166767	0.0356913	0.844517	0.999976	Never>E-cig>Smoker
TC0X002326.hg.1	FIGF	0.00136771	0.0309738	0.770474	0.999976	Smoker>E-cig>Never
TC12003226.hg.1	FKBP11	0.000113331	0.00476872	0.443412	0.999976	Smoker>E-cig>Never
TC20001741.hg.1	FKBP1A	5.07235e-05	0.00260697	0.84158	0.999976	Smoker>E-cig>Never
TC20001373.hg.1	FKBP1A-SDCBP2	6.71872e-12	4.50074e-09	0.842046	0.999976	Smoker>E-cig>Never
TC06000696.hg.1	FKBP1C	0.000628594	0.0174578	0.648683	0.999976	Smoker>E-cig>Never
TC11000590.hg.1	FKBP2	5.74536e-05	0.00286632	0.698276	0.999976	Smoker>E-cig>Never
TC06004150.hg.1	FKBP5	0.00446229	0.0713753	0.732344	0.999976	Never>E-cig>Smoker
TC17001199.hg.1	FLII	0.00136021	0.0308665	0.242461	0.999976	Smoker>E-cig>Never
TC03002049.hg.1	FLJ46066	7.63927e-08	1.33963e-05	0.487836	0.999976	Smoker>E-cig>Never
TC03003238.hg.1	FLJ46066	0.000687465	0.0186747	0.109299	0.999976	Smoker>E-cig>Never
TC20000642.hg.1	FLRT3	1.77581e-05	0.00110816	0.782949	0.999976	Never>E-cig>Smoker
TC02000941.hg.1	FMNL2	1.14125e-05	0.000780103	0.991515	0.999976	Never>E-cig>Smoker
TC01001488.hg.1	FMO2	0.00107565	0.0263168	0.741667	0.999976	Never>E-cig>Smoker
TC01001486.hg.1	FMO3	0.00150611	0.033166	0.13849	0.999976	Never>E-cig>Smoker
TC01003125.hg.1	FMO5	7.29067e-05	0.0034153	0.941689	0.999976	Never>E-cig>Smoker
TC01003722.hg.1	FMOD	0.00169146	0.0360622	0.314465	0.999976	Smoker>E-cig>Never
TC04000808.hg.1	FNIP2	1.89031e-07	2.94484e-05	0.555273	0.999976	Never>E-cig>Smoker
TC04002294.hg.1	FNIP2	9.71957e-07	0.000111489	0.751525	0.999976	Never>E-cig>Smoker
TC11002773.hg.1	FOLR1	3.30607e-05	0.00184997	0.125565	0.999976	Never>E-cig>Smoker
TC11000754.hg.1	FOLR1	6.62509e-05	0.00318823	0.0804122	0.999976	Never>E-cig>Smoker
TC16000899.hg.1	FOPNL	0.000840926	0.0218295	0.682601	0.999976	Smoker>E-cig>Never
TC20000698.hg.1	FOXA2	0.00385648	0.0643271	0.446386	0.999976	Never>E-cig>Smoker
TC19000656.hg.1	FOXA3	0.000107771	0.00461009	0.748215	0.999976	Smoker>E-cig>Never
TC05000931.hg.1	FOXI1	0.00389783	0.0647268	0.0614493	0.999976	Smoker>E-cig>Never
TC12001106.hg.1	FOXM1	0.00399795	0.0660293	0.405162	0.999976	Smoker>E-cig>Never
TC14002331.hg.1	FOXN3	0.000220198	0.00807045	0.672477	0.999976	Never>E-cig>Smoker
TC06000868.hg.1	FOXO3	0.00698601	0.0966898	0.336433	0.999976	Never>E-cig>Smoker
TC10001053.hg.1	FRMD4A	0.000236965	0.00852515	0.10276	0.999976	Never>E-cig>Smoker
TC01002911.hg.1	FRRS1	4.77541e-08	8.88598e-06	0.853847	0.999976	Smoker>E-cig>Never
TC03001691.hg.1	FSTL1	0.0020116	0.0405883	0.743186	0.999976	Never>E-cig>Smoker
TC11001860.hg.1	FTH1	1.00936e-06	0.000114912	0.956777	0.999976	Smoker>E-cig>Never
TC11003179.hg.1	FTH1	7.02299e-06	0.000527133	0.74424	0.999976	Smoker>E-cig>Never
TC02001686.hg.1	FTH1P3	7.13568e-06	0.000531116	0.971222	0.999976	Smoker>E-cig>Never
TC02004131.hg.1	FTH1P3	1.74554e-05	0.00109691	0.954421	0.999976	Smoker>E-cig>Never
TC03001759.hg.1	FTH1P4	1.87912e-05	0.00116124	0.600785	0.999976	Smoker>E-cig>Never
TC19000717.hg.1	FTL	6.51918e-06	0.000502872	0.989913	0.999976	Smoker>E-cig>Never
TC19002195.hg.1	FTL	1.32492e-05	0.000885768	0.755288	0.999976	Smoker>E-cig>Never
TC20000047.hg.1	FTLP3	7.38149e-06	0.000545774	0.919732	0.999976	Smoker>E-cig>Never
TC16000449.hg.1	FTO	0.00243406	0.0463218	0.818869	0.999976	Never>E-cig>Smoker
TC0X000782.hg.1	FUNDC2	0.00240252	0.0459829	0.550094	0.999976	Never>E-cig>Smoker
TC16001494.hg.1	FUS	0.00503898	0.0773947	0.834978	0.999976	Never>E-cig>Smoker
TC19001085.hg.1	FUT3	3.29434e-06	0.000299625	0.320534	0.999976	Smoker>E-cig>Never
TC11000921.hg.1	FUT4	0.000304824	0.0102	0.628974	0.999976	Never>E-cig>Smoker
TC19001084.hg.1	FUT6	0.00010114	0.00441092	0.653406	0.999976	Smoker>E-cig>Never
TC14000397.hg.1	FUT8	0.0035145	0.0599667	0.960643	0.999976	Smoker>E-cig>Never
TC14001735.hg.1	FUT8	0.007049	0.0973661	0.97575	0.999976	Smoker>E-cig>Never
TC19000459.hg.1	FXYD1	0.000243223	0.00862978	0.581658	0.999976	Never>E-cig>Smoker
TC19000458.hg.1	FXYD3	0.00123729	0.0288792	0.684982	0.999976	Smoker>E-cig>Never
TC10001179.hg.1	FZD8	0.000559412	0.0160145	0.463298	0.999976	Never>E-cig>Smoker
TC0X002294.hg.1	G6PD	2.10406e-12	1.67794e-09	0.436144	0.999976	Smoker>E-cig>Never
TC0X001538.hg.1	G6PD	3.07152e-11	1.69648e-08	0.676101	0.999976	Smoker>E-cig>Never
TC04000699.hg.1	GAB1	0.000324452	0.0106962	0.469117	0.999976	Never>E-cig>Smoker
TC11002136.hg.1	GAB2	0.00227844	0.0444463	0.863004	0.999976	Never>E-cig>Smoker
TC12000159.hg.1	GABARAPL1	7.05033e-05	0.00333066	0.858012	0.999976	Smoker>E-cig>Never
TC05002014.hg.1	GABRB2	1.50405e-05	0.000970651	0.356731	0.999976	Smoker>E-cig>Never
TC02001016.hg.1	GAD1	1.62999e-06	0.000166448	0.469552	0.999976	Smoker>E-cig>Never
TC01000745.hg.1	GADD45A	0.00115394	0.0276073	0.0584498	0.999976	Smoker>Never>E-cig
TC19000055.hg.1	GADD45B	1.55345e-08	3.44136e-06	0.338837	0.999976	Never>E-cig>Smoker
TC19001938.hg.1	GADD45B	1.21782e-06	0.000132434	0.522895	0.999976	Never>E-cig>Smoker
TC02005017.hg.1	GAL3ST2	9.42419e-05	0.00418639	0.95009	0.999976	Never>E-cig>Smoker
TC01002350.hg.1	GALE	0.000526139	0.0154157	0.491755	0.999976	Smoker>E-cig>Never
TC18000145.hg.1	GALNT1	0.00730671	0.0998495	0.979677	0.999976	Smoker>E-cig>Never
TC09000498.hg.1	GALNT12	1.86256e-07	2.91517e-05	0.233695	0.999976	Smoker>E-cig>Never
TC02002492.hg.1	GALNT3	8.77589e-05	0.00395935	0.51201	0.999976	Smoker>E-cig>Never
TC02000954.hg.1	GALNT5	2.85926e-08	5.94832e-06	0.163419	0.999976	Smoker>E-cig>Never
TC12001509.hg.1	GALNT6	3.15118e-08	6.41066e-06	0.941616	0.999976	Smoker>E-cig>Never
TC04000853.hg.1	GALNT7	6.7078e-05	0.0032234	0.767287	0.999976	Smoker>E-cig>Never
TC16000638.hg.1	GAN	0.00460987	0.0730038	0.111307	0.999976	Smoker>E-cig>Never
TC12000084.hg.1	GAPDH	0.000121005	0.0050264	0.586958	0.999976	Smoker>E-cig>Never
TC12002203.hg.1	GAPDH	0.000359793	0.0116144	0.605522	0.999976	Smoker>E-cig>Never
TC18000446.hg.1	GAREM1	0.00468635	0.0737963	0.0179525	0.999976	Smoker>E-cig>Never
TC13000899.hg.1	GAS6	0.00109113	0.0265019	0.716674	0.999976	Never>E-cig>Smoker
TC13001319.hg.1	GAS6-AS1	0.00213497	0.0422128	0.0909657	0.999976	Never>E-cig>Smoker
TC13000430.hg.1	GAS6-AS1	0.00490148	0.0760751	0.582011	0.999976	Never>E-cig>Smoker
TC07001663.hg.1	GATS	6.84501e-09	1.71095e-06	0.762046	0.999976	Smoker>E-cig>Never
TC07003081.hg.1	GATS	5.29998e-08	9.70041e-06	0.61516	0.999976	Smoker>E-cig>Never
TC07003360.hg.1	GATSL2	1.12297e-09	3.92704e-07	0.652528	0.999976	Smoker>E-cig>Never
TC07000463.hg.1	GATSL2	2.28952e-09	6.97137e-07	0.73765	0.999976	Smoker>E-cig>Never
TC07000464.hg.1	GATSL2	3.76267e-05	0.00205157	0.378516	0.999976	Smoker>E-cig>Never
TC10000752.hg.1	GBF1	0.000460623	0.0139495	0.322469	0.999976	Smoker>E-cig>Never
TC01000835.hg.1	GBP6	2.71642e-09	7.98104e-07	0.143684	0.999976	Smoker>E-cig>Never
TC06004051.hg.1	GCLC	2.86119e-09	8.26143e-07	0.508189	0.999976	Smoker>E-cig>Never
TC01002882.hg.1	GCLM	5.97309e-09	1.53451e-06	0.941598	0.999976	Smoker>E-cig>Never
TC09002021.hg.1	GCNT1	0.00102928	0.0255068	0.0448865	0.999976	Smoker>E-cig>Never
TC09000350.hg.1	GCNT1	0.00539101	0.0810806	0.112568	0.999976	Smoker>E-cig>Never
TC06000071.hg.1	GCNT2	0.000261503	0.00909532	0.248744	0.999976	Smoker>E-cig>Never
TC15000456.hg.1	GCNT3	0.000219052	0.00805371	0.26725	0.999976	Smoker>E-cig>Never
TC08000493.hg.1	GDAP1	0.00132467	0.030265	0.382024	0.999976	Smoker>E-cig>Never
TC19000356.hg.1	GDF15	2.59619e-07	3.79724e-05	0.199294	0.999976	Smoker>E-cig>Never
TC01002855.hg.1	GEMIN8P4	0.000743147	0.0198651	0.230791	0.999976	Smoker>Never>E-cig
TC20000788.hg.1	GGT7	0.000473885	0.014248	0.641915	0.999976	Never>E-cig>Smoker
TC10000591.hg.1	GHITM	0.00300351	0.0539309	0.550641	0.999976	Smoker>E-cig>Never
TC19001238.hg.1	GIPC1	0.000568867	0.0162297	0.671409	0.999976	Smoker>E-cig>Never
TC01006272.hg.1	GIPC2	0.00377664	0.0634377	0.0602816	0.999976	E-cig>Never>Smoker
TC07001319.hg.1	GLI3	4.40517e-06	0.000374484	0.640616	0.999976	Never>E-cig>Smoker
TC09000879.hg.1	GLIS3	0.000191353	0.0073167	0.847137	0.999976	Never>E-cig>Smoker
TC09002386.hg.1	GLIS3	0.000620103	0.0172649	0.876894	0.999976	Never>E-cig>Smoker
TC04000798.hg.1	GLRB	0.000160448	0.0063373	0.874404	0.999976	Never>E-cig>Smoker
TC10000933.hg.1	GLRX3	0.00401664	0.0662258	0.760107	0.999976	Smoker>E-cig>Never
TC01003605.hg.1	GLUL	0.00067407	0.0183854	0.296675	0.999976	Never>E-cig>Smoker
TC06001213.hg.1	GMDS	4.66529e-07	6.25037e-05	0.806754	0.999976	Smoker>E-cig>Never
TC06000149.hg.1	GMNN	0.00210352	0.0418313	0.540294	0.999976	Never>E-cig>Smoker
TC09001068.hg.1	GNE	0.00383307	0.0640963	0.42684	0.999976	Smoker>E-cig>Never
TC01003995.hg.1	GNG4	0.00241544	0.0461146	0.802553	0.999976	Smoker>E-cig>Never
TC14001142.hg.1	GNPNAT1	6.96639e-05	0.00330968	0.42148	0.999976	Smoker>E-cig>Never
TC12001880.hg.1	GNPTAB	0.00426547	0.0689849	0.146083	0.999976	Never>E-cig>Smoker
TC12003216.hg.1	GOLGA3	0.000188112	0.0072172	0.193371	0.999976	E-cig>Smoker>Never
TC15001171.hg.1	GOLGA8K	0.00107358	0.0263047	0.298068	0.999976	E-cig>Never>Smoker
TC04000460.hg.1	GPAT3	4.71266e-09	1.2833e-06	0.553877	0.999976	Smoker>E-cig>Never
TC0X001376.hg.1	GPC4	0.00505366	0.0775388	0.872718	0.999976	Smoker>E-cig>Never
TC03000157.hg.1	GPD1L	0.00529413	0.0799826	0.120958	0.999976	E-cig>Never>Smoker
TC19000442.hg.1	GPI	0.000672929	0.0183842	0.324764	0.999976	Smoker>E-cig>Never
TC03000494.hg.1	GPR15	0.0030106	0.0540094	0.462312	0.999976	Smoker>E-cig>Never
TC02002539.hg.1	GPR155	0.000213001	0.0079065	0.511265	0.999976	Never>E-cig>Smoker
TC03000910.hg.1	GPR160	0.00210559	0.0418313	0.9934	0.999976	Smoker>E-cig>Never
TC16000426.hg.1	GPT2	0.000184495	0.00710283	0.295785	0.999976	Smoker>E-cig>Never
TC14001223.hg.1	GPX2	2.21841e-15	5.71565e-12	0.615384	0.999976	Smoker>E-cig>Never
TC19000454.hg.1	GRAMD1A	0.00271878	0.0506187	0.582435	0.999976	Never>E-cig>Smoker
TC01000309.hg.1	GRHL3	0.0059751	0.0871646	0.234852	0.999976	Smoker>E-cig>Never
TC21000906.hg.1	GRIK1	0.00627683	0.0902706	0.359705	0.999976	E-cig>Smoker>Never
TC06001063.hg.1	GRM1	0.000460459	0.0139495	0.410936	0.999976	Smoker>E-cig>Never
TC11002176.hg.1	GRM5	5.53851e-05	0.00278844	0.510427	0.999976	Never>E-cig>Smoker
TC11003285.hg.1	GRM5	0.000221819	0.00811978	0.401947	0.999976	Never>E-cig>Smoker
TC08001110.hg.1	GSR	5.38541e-16	2.00421e-12	0.98794	0.999976	Smoker>E-cig>Never
TC20000789.hg.1	GSS	0.00460691	0.0729914	0.7497	0.999976	Smoker>E-cig>Never
TC06001803.hg.1	GSTA1	0.00413059	0.0674772	0.735402	0.999976	Smoker>E-cig>Never
TC06001802.hg.1	GSTA2	0.0028873	0.0525012	0.97038	0.999976	Smoker>E-cig>Never
TC06001807.hg.1	GSTA4	0.00135782	0.0308331	0.421729	0.999976	Smoker>E-cig>Never
TC06001804.hg.1	GSTA5	0.000919898	0.0233771	0.917381	0.999976	Smoker>E-cig>Never
TC06001801.hg.1	GSTA7P	0.000306763	0.0102306	0.773492	0.999976	E-cig>Smoker>Never
TC06003681.hg.1	GSTA7P	0.000307869	0.0102401	0.797918	0.999976	Smoker>E-cig>Never
TC01006286.hg.1	GSTM2	0.00177235	0.037265	0.313927	0.999976	Never>E-cig>Smoker
TC11000694.hg.1	GSTP1	3.95147e-05	0.00213125	0.827653	0.999976	Smoker>E-cig>Never
TC08001109.hg.1	GTF2E2	9.61364e-05	0.00425362	0.943122	0.999976	Smoker>E-cig>Never
TC16000979.hg.1	GTF3C1	2.85382e-07	4.1024e-05	0.429521	0.999976	Smoker>E-cig>Never
TC06000886.hg.1	GTF3C6	0.00520928	0.0790631	0.366565	0.999976	Smoker>E-cig>Never
TC04002283.hg.1	GUCY1A3	0.00552982	0.082428	0.601137	0.999976	Smoker>E-cig>Never
TC02001103.hg.1	GULP1	7.34403e-07	8.97741e-05	0.841334	0.999976	Smoker>E-cig>Never
TC22001254.hg.1	GUSBP11	0.00336455	0.0582389	0.883425	0.999976	Never>E-cig>Smoker
TC03003359.hg.1	GXYLT2	2.11279e-07	3.21663e-05	0.801713	0.999976	Never>E-cig>Smoker
TC03000801.hg.1	GYG1	0.000533874	0.0155492	0.602339	0.999976	Smoker>E-cig>Never
TC11001273.hg.1	H19	5.00477e-09	1.34104e-06	0.022302	0.999976	Smoker>E-cig>Never
TC11003000.hg.1	H19	7.03224e-09	1.74472e-06	0.03277	0.999976	Smoker>E-cig>Never
TC11002362.hg.1	H2AFX	0.00727751	0.0995316	0.533037	0.999976	Smoker>E-cig>Never
TC05001801.hg.1	H2AFY	0.0029572	0.0533379	0.230773	0.999976	Smoker>E-cig>Never
TC17001882.hg.1	H3F3B	0.00210568	0.0418313	0.368341	0.999976	Never>E-cig>Smoker
TC18000166.hg.1	HAUS1	0.00126554	0.0294179	0.291713	0.999976	Smoker>E-cig>Never
TC18000697.hg.1	HAUS1	0.00395932	0.0654881	0.299392	0.999976	Smoker>E-cig>Never
TC04000972.hg.1	HAUS3	2.94253e-06	0.000272257	0.943141	0.999976	Never>E-cig>Smoker
TC16000008.hg.1	HBA1	0.00528583	0.0799294	0.377285	0.999976	Never>E-cig>Smoker
TC16000007.hg.1	HBA2	0.00634527	0.0909158	0.365979	0.999976	Never>E-cig>Smoker
TC12002077.hg.1	HCAR1	0.00572234	0.0844335	0.811366	0.999976	Never>E-cig>Smoker
TC12002078.hg.1	HCAR2	3.37317e-05	0.00187676	0.473196	0.999976	Never>E-cig>Smoker
TC12002079.hg.1	HCAR3	0.000252615	0.00885051	0.805898	0.999976	Never>E-cig>Smoker
TC02002948.hg.1	HDLBP	0.00201995	0.0407078	0.189546	0.999976	E-cig>Smoker>Never
TC06001030.hg.1	HEBP2	0.000753194	0.0201016	0.466772	0.999976	Smoker>E-cig>Never
TC04000486.hg.1	HERC3	0.00158772	0.0344425	0.797652	0.999976	Never>E-cig>Smoker
TC06000960.hg.1	HEY2	0.000108472	0.00462823	0.572574	0.999976	Never>E-cig>Smoker
TC06003538.hg.1	HFE	0.00259054	0.0486638	0.808181	0.999976	Smoker>Never>E-cig
TC03001692.hg.1	HGD	4.98145e-13	4.76711e-10	0.796499	0.999976	Smoker>E-cig>Never
TC17001867.hg.1	HID1	0.00467598	0.0737022	0.954612	0.999976	Smoker>E-cig>Never
TC03003376.hg.1	HIGD1A	8.85208e-05	0.00398324	0.759473	0.999976	Smoker>E-cig>Never
TC06001340.hg.1	HIST1H1A	0.00474206	0.0744286	0.00230883	0.683901	E-cig>Smoker>Never
TC06000223.hg.1	HIST1H2AG	0.0054067	0.0812094	0.689344	0.999976	Smoker>Never>E-cig
TC06000225.hg.1	HIST1H2AH	0.00280894	0.0516086	0.0715345	0.999976	Smoker>Never>E-cig
TC06001422.hg.1	HIST1H2AJ	0.000121106	0.0050264	0.745351	0.999976	Smoker>E-cig>Never
TC06001344.hg.1	HIST1H2BB	0.00503835	0.0773947	0.241727	0.999976	Smoker>Never>E-cig
TC06001387.hg.1	HIST1H2BK	0.00429528	0.0693664	0.736785	0.999976	Smoker>Never>E-cig
TC06000268.hg.1	HIST1H2BN	0.000597819	0.01684	0.472839	0.999976	Smoker>Never>E-cig
TC06001342.hg.1	HIST1H3B	0.000132695	0.00539894	0.214325	0.999976	Smoker>E-cig>Never
TC06001353.hg.1	HIST1H3F	0.00645636	0.0919399	0.575592	0.999976	Smoker>Never>E-cig
TC06001354.hg.1	HIST1H3G	0.000449401	0.0137287	0.195455	0.999976	Smoker>E-cig>Never
TC06001355.hg.1	HIST1H4H	1.45356e-06	0.000152521	0.0748458	0.999976	Smoker>E-cig>Never
TC01003192.hg.1	HIST2H4B	0.000751052	0.0200604	0.161466	0.999976	Never>E-cig>Smoker
TC01001173.hg.1	HIST2H4B	0.00109322	0.0265336	0.11044	0.999976	Never>E-cig>Smoker
TC01001893.hg.1	HIST3H2BB	0.0049703	0.076752	0.849987	0.999976	Never>E-cig>Smoker
TC19000514.hg.1	HKR1	0.00389729	0.0647268	0.692867	0.999976	Never>E-cig>Smoker
TC6_ssto_hap7000171.hg.1	HLA-DOA	0.0053726	0.0808521	0.411914	0.999976	Never>E-cig>Smoker
TC6_dbb_hap3000187.hg.1	HLA-DOA	0.00578712	0.0850521	0.4158	0.999976	Never>E-cig>Smoker
TC6_mann_hap4000169.hg.1	HLA-DOA	0.00578712	0.0850521	0.4158	0.999976	Never>E-cig>Smoker
TC6_dbb_hap3000091.hg.1	HLA-DPB1	0.0067109	0.0940875	0.300533	0.999976	Never>E-cig>Smoker
TC6_ssto_hap7000085.hg.1	HLA-DPB1	0.0067109	0.0940875	0.300533	0.999976	Never>E-cig>Smoker
TC06002733.hg.1	HLA-DPB2	0.00303944	0.0542194	0.400822	0.999976	Never>E-cig>Smoker
TC6_apd_hap1000124.hg.1	HLA-DPB2	0.00497608	0.0768058	0.514622	0.999976	Never>E-cig>Smoker
TC6_cox_hap2000229.hg.1	HLA-DPB2	0.00524799	0.0795008	0.484019	0.999976	Never>E-cig>Smoker
TC06000409.hg.1	HLA-DPB2	0.00534292	0.0805381	0.427673	0.999976	Never>E-cig>Smoker
TC6_ssto_hap7000086.hg.1	HLA-DPB2	0.00676644	0.0945578	0.595587	0.999976	Never>E-cig>Smoker
TC6_mann_hap4000078.hg.1	HLA-DQA2	0.00194339	0.0396179	0.324412	0.999976	Never>E-cig>Smoker
TC6_cox_hap2000094.hg.1	HLA-DQA2	0.00229773	0.0446404	0.287634	0.999976	Never>E-cig>Smoker
TC6_qbl_hap6000085.hg.1	HLA-DQA2	0.00312368	0.05531	0.309099	0.999976	Never>E-cig>Smoker
TC6_mcf_hap5000079.hg.1	HLA-DQA2	0.00326015	0.0570808	0.277641	0.999976	Never>E-cig>Smoker
TC6_ssto_hap7000080.hg.1	HLA-DQA2	0.00346509	0.0594264	0.283018	0.999976	Never>E-cig>Smoker
TC6_dbb_hap3000087.hg.1	HLA-DQA2	0.00360101	0.0610694	0.308158	0.999976	Never>E-cig>Smoker
TC06000403.hg.1	HLA-DQA2	0.00360739	0.0611157	0.26955	0.999976	Never>E-cig>Smoker
TC6_apd_hap1000047.hg.1	HLA-DQA2	0.00379378	0.0636021	0.303958	0.999976	Never>E-cig>Smoker
TC06003411.hg.1	HLA-DQB1	7.09275e-05	0.00334598	0.143208	0.999976	Smoker>E-cig>Never
TC6_dbb_hap3000182.hg.1	HLA-DQB2	0.00165178	0.0353965	0.84112	0.999976	Never>E-cig>Smoker
TC6_mcf_hap5000171.hg.1	HLA-DQB2	0.00165178	0.0353965	0.84112	0.999976	Never>E-cig>Smoker
TC6_apd_hap1000102.hg.1	HLA-DQB2	0.00190283	0.0390763	0.891119	0.999976	Never>E-cig>Smoker
TC6_cox_hap2000196.hg.1	HLA-DQB2	0.00190283	0.0390763	0.891119	0.999976	Never>E-cig>Smoker
TC6_mann_hap4000164.hg.1	HLA-DQB2	0.0021277	0.042094	0.822667	0.999976	Never>E-cig>Smoker
TC6_qbl_hap6000184.hg.1	HLA-DQB2	0.0021277	0.042094	0.822667	0.999976	Never>E-cig>Smoker
TC06001571.hg.1	HLA-DQB2	0.00317946	0.056108	0.975907	0.999976	Never>E-cig>Smoker
TC6_ssto_hap7000166.hg.1	HLA-DQB2	0.00317946	0.056108	0.975907	0.999976	Never>E-cig>Smoker
TC17000693.hg.1	HLF	0.000259644	0.00904005	0.604428	0.999976	Never>E-cig>Smoker
TC20000191.hg.1	HM13	2.07437e-06	0.000203154	0.266396	0.999976	Smoker>E-cig>Never
TC11001083.hg.1	HMBS	0.00712195	0.0980044	0.241926	0.999976	Smoker>E-cig>Never
TC21000988.hg.1	HMGN1	0.00117229	0.0278868	0.432706	0.999976	Smoker>E-cig>Never
TC06000195.hg.1	HMGN4	1.11361e-07	1.8465e-05	0.227036	0.999976	Smoker>E-cig>Never
TC17001872.hg.1	HN1	6.03555e-10	2.4066e-07	0.549128	0.999976	Smoker>E-cig>Never
TC12003126.hg.1	HNF1A-AS1	4.14895e-07	5.69528e-05	0.00331298	0.860193	Never>E-cig>Smoker
TC12002057.hg.1	HNF1A-AS1	6.38432e-07	8.03897e-05	0.22354	0.999976	Never>E-cig>Smoker
TC12002056.hg.1	HNF1A-AS1	0.00289396	0.0525781	0.627509	0.999976	Never>E-cig>Smoker
TC02000891.hg.1	HNMT	5.89293e-06	0.000470529	0.459634	0.999976	Never>E-cig>Smoker
TC05001522.hg.1	HOMER1	0.00633772	0.0909158	0.392769	0.999976	Smoker>Never>E-cig
TC04001753.hg.1	HPGD	0.00731225	0.0998844	0.685627	0.999976	Never>E-cig>Smoker
TC12002010.hg.1	HRK	0.00664574	0.093487	0.863682	0.999976	Smoker>E-cig>Never
TC08001461.hg.1	HRSP12	0.00678538	0.094735	0.992274	0.999976	Smoker>E-cig>Never
TC0X001372.hg.1	HS6ST2	0.000498679	0.0148469	0.0446369	0.999976	Smoker>E-cig>Never
TC16000650.hg.1	HSBP1	0.000157497	0.00624286	0.987418	0.999976	Smoker>E-cig>Never
TC18000266.hg.1	HSBP1L1	0.00345303	0.0593107	0.0569338	0.999976	Never>E-cig>Smoker
TC04002945.hg.1	HSD17B11	0.000683319	0.0186074	0.864658	0.999976	Never>E-cig>Smoker
TC04002944.hg.1	HSD17B13	4.57694e-08	8.64013e-06	0.0329086	0.999976	Never>E-cig>Smoker
TC06001547.hg.1	HSPA1A	6.68812e-07	8.38996e-05	0.108875	0.999976	Smoker>E-cig>Never
TC6_dbb_hap3000163.hg.1	HSPA1A	4.75387e-06	0.000398065	0.119828	0.999976	Smoker>E-cig>Never
TC6_qbl_hap6000069.hg.1	HSPA1A	6.8978e-06	0.000521524	0.0909619	0.999976	Smoker>E-cig>Never
TC6_qbl_hap6000164.hg.1	HSPA1A	7.04057e-06	0.000527133	0.155099	0.999976	Smoker>E-cig>Never
TC6_cox_hap2000078.hg.1	HSPA1A	7.41528e-06	0.000547065	0.0905101	0.999976	Smoker>E-cig>Never
TC6_dbb_hap3000069.hg.1	HSPA1A	7.85128e-06	0.000565529	0.0946267	0.999976	Smoker>E-cig>Never
TC6_apd_hap1000039.hg.1	HSPA1A	8.25942e-06	0.000591113	0.0859839	0.999976	Smoker>E-cig>Never
TC6_cox_hap2000174.hg.1	HSPA1A	1.01738e-05	0.000706973	0.1496	0.999976	Smoker>E-cig>Never
TC6_apd_hap1000088.hg.1	HSPA1A	2.13801e-05	0.00129261	0.214544	0.999976	Smoker>E-cig>Never
TC06000384.hg.1	HSPA1A	3.25939e-05	0.00183479	0.0820232	0.999976	Smoker>E-cig>Never
TC6_apd_hap1000040.hg.1	HSPA1B	2.14663e-06	0.000209619	0.131066	0.999976	Smoker>E-cig>Never
TC6_cox_hap2000079.hg.1	HSPA1B	2.30053e-06	0.000222058	0.12899	0.999976	Smoker>E-cig>Never
TC6_dbb_hap3000070.hg.1	HSPA1B	2.40037e-06	0.000229054	0.131637	0.999976	Smoker>E-cig>Never
TC6_qbl_hap6000070.hg.1	HSPA1B	3.24355e-06	0.000296021	0.134791	0.999976	Smoker>E-cig>Never
TC06000385.hg.1	HSPA1B	1.11147e-05	0.000768501	0.0591608	0.999976	Smoker>E-cig>Never
TC14000391.hg.1	HSPA2	0.00284695	0.0519933	0.126237	0.999976	Never>E-cig>Smoker
TC01005500.hg.1	HSPB11	0.00117905	0.0280276	0.690914	0.999976	Smoker>E-cig>Never
TC01002679.hg.1	HSPB11	0.00672205	0.0941649	0.71428	0.999976	Smoker>E-cig>Never
TC19001865.hg.1	HSPBP1	0.00649011	0.0920812	0.30195	0.999976	Smoker>E-cig>Never
TC02005004.hg.1	HSPE1	0.0057524	0.0848023	0.447406	0.999976	Smoker>Never>E-cig
TC11000256.hg.1	HTATIP2	1.40667e-12	1.17788e-09	0.940103	0.999976	Smoker>E-cig>Never
TC02002858.hg.1	HTR2B	0.00172716	0.0366218	0.131743	0.999976	Smoker>E-cig>Never
TC11002361.hg.1	HYOU1	0.00513153	0.0783035	0.112275	0.999976	Smoker>E-cig>Never
TC07001143.hg.1	ICA1	3.99248e-06	0.000346435	0.89702	0.999976	Smoker>E-cig>Never
TC06001809.hg.1	ICK	0.00050726	0.0150222	0.496157	0.999976	Smoker>E-cig>Never
TC17000839.hg.1	ICT1	0.00302649	0.0541695	0.135283	0.999976	Smoker>E-cig>Never
TC15001841.hg.1	IDH2	4.73907e-05	0.00246476	0.943111	0.999976	Smoker>E-cig>Never
TC20000563.hg.1	IDH3B	0.00338115	0.0584402	0.76142	0.999976	Never>E-cig>Smoker
TC09000378.hg.1	IDNK	0.000351242	0.0114327	0.879682	0.999976	Smoker>E-cig>Never
TC0X002343.hg.1	IDS	1.46508e-11	9.0873e-09	0.558594	0.999976	Smoker>E-cig>Never
TC0X002267.hg.1	IDS	3.60541e-07	4.99007e-05	0.455262	0.999976	Smoker>E-cig>Never
TC21001060.hg.1	IFNAR2	2.22648e-05	0.00134367	0.0805302	0.999976	Smoker>E-cig>Never
TC07003291.hg.1	IFRD1	5.90022e-06	0.000470529	0.675017	0.999976	Smoker>E-cig>Never
TC12001890.hg.1	IGF1	4.14382e-08	7.97661e-06	0.476217	0.999976	Smoker>E-cig>Never
TC15000949.hg.1	IGF1R	0.00401244	0.0662033	0.655306	0.999976	Never>E-cig>Smoker
TC03002079.hg.1	IGF2BP2	7.05069e-06	0.000527133	0.486115	0.999976	Never>E-cig>Smoker
TC14002211.hg.1	IGHA1	0.0003712	0.0117848	0.685639	0.999976	Never>E-cig>Smoker
TC14002250.hg.1	IGHV3-11	0.0025928	0.0486789	0.695122	0.999976	Never>E-cig>Smoker
TC14002252.hg.1	IGHV3-15	0.00489686	0.076074	0.257517	0.999976	Never>E-cig>Smoker
TC14002255.hg.1	IGHV3-20	8.04551e-05	0.00370669	0.110736	0.999976	Never>E-cig>Smoker
TC14002257.hg.1	IGHV3-23	0.000684441	0.0186228	0.307802	0.999976	Never>E-cig>Smoker
TC14002261.hg.1	IGHV3-30	0.00471928	0.0742002	0.359624	0.999976	Never>E-cig>Smoker
TC14002265.hg.1	IGHV3-35	0.0018035	0.0377541	0.417544	0.999976	Never>E-cig>Smoker
TC14002268.hg.1	IGHV3-43	0.000473167	0.0142392	0.351883	0.999976	Never>E-cig>Smoker
TC14002271.hg.1	IGHV3-48	0.00668575	0.0938921	0.742725	0.999976	Never>E-cig>Smoker
TC14002274.hg.1	IGHV3-53	6.03478e-05	0.00297462	0.435023	0.999976	Never>E-cig>Smoker
TC14002278.hg.1	IGHV3-64	0.00291021	0.0528031	0.601069	0.999976	Never>E-cig>Smoker
TC14002279.hg.1	IGHV3-66	0.00121648	0.0287024	0.386262	0.999976	Never>E-cig>Smoker
TC14002247.hg.1	IGHV3-7	0.00241473	0.0461146	0.947284	0.999976	Never>E-cig>Smoker
TC14002282.hg.1	IGHV3-72	0.00307311	0.0546632	0.366888	0.999976	Never>E-cig>Smoker
TC14002283.hg.1	IGHV3-73	0.000615292	0.0171595	0.0635471	0.999976	Never>E-cig>Smoker
TC02000559.hg.1	IGKC	0.00410905	0.0672342	0.478545	0.999976	Never>E-cig>Smoker
TC02003396.hg.1	IGKC	0.00479373	0.0749923	0.210965	0.999976	Never>E-cig>Smoker
TC02004395.hg.1	IGKC	0.00705459	0.0973944	0.426896	0.999976	Never>E-cig>Smoker
TC02004985.hg.1	IGKV1D-12	0.00144193	0.0320264	0.655698	0.999976	Never>E-cig>Smoker
TC02004982.hg.1	IGKV1D-16	0.00710637	0.097951	0.172413	0.999976	Never>E-cig>Smoker
TC02004944.hg.1	IGKV2-24	0.000143965	0.00577482	0.677192	0.999976	Never>E-cig>Smoker
TC02000555.hg.1	IGKV2D-24	0.000275216	0.00945443	0.481571	0.999976	Never>E-cig>Smoker
TC02000554.hg.1	IGKV2D-26	0.00307894	0.0547298	0.864497	0.999976	Never>E-cig>Smoker
TC02004978.hg.1	IGKV2D-28	0.00689838	0.0958731	0.381302	0.999976	Never>E-cig>Smoker
TC02004973.hg.1	IGKV2D-40	0.00179111	0.0375235	0.122557	0.999976	E-cig>Never>Smoker
TC22000119.hg.1	IGLV2-18	0.00723491	0.0991109	0.368292	0.999976	Never>E-cig>Smoker
TC03001679.hg.1	IGSF11	6.40364e-05	0.00311065	0.597545	0.999976	Smoker>E-cig>Never
TC02002740.hg.1	IKZF2	0.00366377	0.0619769	0.108157	0.999976	Smoker>E-cig>Never
TC15000756.hg.1	IL16	0.00654696	0.0926173	0.551657	0.999976	Never>E-cig>Smoker
TC06002150.hg.1	IL20RA	0.0042352	0.0686279	0.863576	0.999976	Never>E-cig>Smoker
TC16000293.hg.1	IL4R	5.80096e-11	2.98919e-08	0.593628	0.999976	Never>E-cig>Smoker
TC03001122.hg.1	IL5RA	0.00143815	0.0320264	0.944296	0.999976	Never>E-cig>Smoker
TC18000060.hg.1	IMPA2	3.3435e-08	6.74623e-06	0.715748	0.999976	Smoker>E-cig>Never
TC02000762.hg.1	INHBB	0.000110814	0.00470417	0.442423	0.999976	Never>E-cig>Smoker
TC15001246.hg.1	INO80	0.00239564	0.0459299	0.375921	0.999976	Never>E-cig>Smoker
TC01002528.hg.1	INPP5B	0.000126615	0.0051971	0.16776	0.999976	Never>E-cig>Smoker
TC19001111.hg.1	INSR	5.81286e-08	1.05813e-05	0.0516339	0.999976	Never>E-cig>Smoker
TC06001592.hg.1	IP6K3	0.00152968	0.0335088	0.630222	0.999976	Smoker>E-cig>Never
TC10001312.hg.1	IPMK	0.00469181	0.0738475	0.989293	0.999976	Smoker>E-cig>Never
TC01000553.hg.1	IPO13	1.39955e-05	0.000924917	0.622924	0.999976	Smoker>E-cig>Never
TC14002339.hg.1	IPO4	0.00564405	0.083758	0.746113	0.999976	Smoker>E-cig>Never
TC03001699.hg.1	IQCB1	0.00456487	0.0725311	0.364942	0.999976	Smoker>E-cig>Never
TC03001187.hg.1	IQSEC1	4.89712e-07	6.48317e-05	0.39025	0.999976	Never>E-cig>Smoker
TC01003985.hg.1	IRF2BP2	5.50134e-06	0.000448325	0.337935	0.999976	Never>E-cig>Smoker
TC0X002182.hg.1	IRS4	0.00233969	0.045215	0.45657	0.999976	E-cig>Smoker>Never
TC05001120.hg.1	IRX2	0.00107971	0.0263392	0.447334	0.999976	Never>E-cig>Smoker
TC16001124.hg.1	IRX3	3.79732e-06	0.000334704	0.416745	0.999976	Never>E-cig>Smoker
TC12000029.hg.1	ITFG2	0.000795847	0.0209561	0.177938	0.999976	Never>E-cig>Smoker
TC17000654.hg.1	ITGA3	9.20088e-05	0.00409806	0.86126	0.999976	Never>E-cig>Smoker
TC02001030.hg.1	ITGA6	0.00711771	0.0979863	0.371393	0.999976	Smoker>E-cig>Never
TC03000181.hg.1	ITGA9	2.73844e-07	3.98789e-05	0.24266	0.999976	Never>E-cig>Smoker
TC02001100.hg.1	ITGAV	0.00299934	0.0539303	0.776971	0.999976	Smoker>E-cig>Never
TC13001260.hg.1	ITGBL1	0.00342968	0.0590004	0.341623	0.999976	Never>E-cig>Smoker
TC01003409.hg.1	ITLN1	0.00129176	0.029636	0.153267	0.999976	Never>E-cig>Smoker
TC0X001180.hg.1	ITM2A	2.53616e-06	0.000237944	0.861504	0.999976	Never>E-cig>Smoker
TC03000013.hg.1	ITPR1	6.80366e-06	0.00051557	0.987928	0.999976	Smoker>E-cig>Never
TC05002634.hg.1	JADE2	0.00010366	0.00448648	0.977043	0.999976	Never>E-cig>Smoker
TC10000940.hg.1	JAKMIP3	5.33267e-05	0.00272275	0.82852	0.999976	Smoker>E-cig>Never
TC07000878.hg.1	JHDM1D-AS1	0.00045648	0.0139059	0.915569	0.999976	Never>E-cig>Smoker
TC07002622.hg.1	JHDM1D-AS1	0.000638017	0.0176756	0.689109	0.999976	Never>E-cig>Smoker
TC14000358.hg.1	JKAMP	0.0033083	0.0577427	0.414183	0.999976	Smoker>E-cig>Never
TC01003282.hg.1	JTB	6.69704e-06	0.00051102	0.626353	0.999976	Smoker>E-cig>Never
TC19000228.hg.1	JUNB	0.00696908	0.0964954	0.406745	0.999976	Never>E-cig>Smoker
TC17001610.hg.1	KANSL1	0.00152456	0.0334405	0.459345	0.999976	Never>E-cig>Smoker
TC17_ctg5_hap1000005.hg.1	KANSL1	0.00449684	0.0717567	0.301435	0.999976	Never>E-cig>Smoker
TC17000648.hg.1	KAT7	0.00336305	0.0582389	0.651932	0.999976	Never>E-cig>Smoker
TC16000371.hg.1	KAT8	0.000394506	0.0123376	0.149077	0.999976	Never>E-cig>Smoker
TC16000496.hg.1	KATNB1	3.96489e-06	0.000346346	0.961252	0.999976	Smoker>E-cig>Never
TC11001742.hg.1	KBTBD4	0.00401776	0.0662258	0.963412	0.999976	Smoker>E-cig>Never
TC12001914.hg.1	KCCAT198	0.00307133	0.0546606	0.321867	0.999976	E-cig>Never>Smoker
TC12002188.hg.1	KCNA1	3.94802e-05	0.00213125	0.11005	0.999976	Never>E-cig>Smoker
TC01004613.hg.1	KCNC4	0.000762678	0.02029	0.990013	0.999976	Never>E-cig>Smoker
TC21000940.hg.1	KCNE1	0.00373223	0.0630077	0.476407	0.999976	Smoker>E-cig>Never
TC21000418.hg.1	KCNE1	0.00508392	0.077896	0.705675	0.999976	Smoker>E-cig>Never
TC11002082.hg.1	KCNE3	0.000537928	0.015613	0.812602	0.999976	Smoker>E-cig>Never
TC11002443.hg.1	KCNJ1	0.00170156	0.0362084	0.144013	0.999976	Never>E-cig>Smoker
TC11003408.hg.1	KCNJ1	0.0025984	0.048721	0.305535	0.999976	Never>E-cig>Smoker
TC17000813.hg.1	KCNJ2	5.87397e-09	1.53451e-06	0.0226268	0.999976	Never>E-cig>Smoker
TC17002770.hg.1	KCNJ2-AS1	2.36947e-11	1.36833e-08	0.501759	0.999976	Never>E-cig>Smoker
TC17001833.hg.1	KCNJ2-AS1	1.40083e-09	4.78769e-07	0.483929	0.999976	Never>E-cig>Smoker
TC01001928.hg.1	KCNK1	6.3283e-06	0.000492056	0.108385	0.999976	Smoker>E-cig>Never
TC19000525.hg.1	KCNK6	0.00128968	0.029636	0.685707	0.999976	Smoker>E-cig>Never
TC03000948.hg.1	KCNMB2	0.0047381	0.0744013	0.532478	0.999976	Never>E-cig>Smoker
TC08001652.hg.1	KCNQ3	1.86293e-05	0.0011555	0.169174	0.999976	Never>E-cig>Smoker
TC13000741.hg.1	KCTD12	4.17543e-08	7.99153e-06	0.174152	0.999976	Never>E-cig>Smoker
TC03000379.hg.1	KCTD6	0.000700055	0.018986	0.71782	0.999976	Never>E-cig>Smoker
TC22000301.hg.1	KDELR3	2.62894e-06	0.000244594	0.734439	0.999976	Smoker>E-cig>Never
TC05000699.hg.1	KDM3B	0.00405232	0.0666315	0.14804	0.999976	Never>E-cig>Smoker
TC07001917.hg.1	KDM7A	0.000790338	0.0208602	0.426563	0.999976	Never>E-cig>Smoker
TC16000290.hg.1	KDM8	0.000212625	0.00790419	0.972559	0.999976	Never>E-cig>Smoker
TC19001166.hg.1	KEAP1	1.42965e-05	0.000935246	0.968499	0.999976	Smoker>E-cig>Never
TC17001302.hg.1	KIAA0100	0.00285991	0.0521732	0.1339	0.999976	Smoker>E-cig>Never
TC06001326.hg.1	KIAA0319	2.30939e-06	0.000222272	0.791728	0.999976	Smoker>E-cig>Never
TC16000897.hg.1	KIAA0430	0.00627977	0.0902723	0.181585	0.999976	Never>E-cig>Smoker
TC07001930.hg.1	KIAA1147	3.66293e-07	5.04881e-05	0.569375	0.999976	Smoker>E-cig>Never
TC04000329.hg.1	KIAA1211	0.00241766	0.0461146	0.171865	0.999976	Smoker>E-cig>Never
TC07001907.hg.1	KIAA1549	3.44517e-07	4.78806e-05	0.225655	0.999976	Smoker>E-cig>Never
TC0X001163.hg.1	KIAA2022	0.0018279	0.0380962	0.928112	0.999976	Never>E-cig>Smoker
TC09000894.hg.1	KIAA2026	0.00670869	0.0940875	0.560512	0.999976	Never>E-cig>Smoker
TC12001391.hg.1	KIF21A	4.90916e-05	0.00254531	0.830566	0.999976	Never>E-cig>Smoker
TC15000638.hg.1	KIF23	1.77414e-05	0.00110816	0.310074	0.999976	Smoker>E-cig>Never
TC05002400.hg.1	KIF2A	0.000244823	0.00865903	0.787764	0.999976	Never>E-cig>Smoker
TC05003396.hg.1	KIF2A	0.00115274	0.0276073	0.963737	0.999976	Never>E-cig>Smoker
TC13000733.hg.1	KLF12	0.000761048	0.0202627	0.516286	0.999976	Never>E-cig>Smoker
TC09001447.hg.1	KLF4	0.000201445	0.00762395	0.680861	0.999976	Smoker>E-cig>Never
TC01004216.hg.1	KLHDC7A	0.00101319	0.0251936	0.880052	0.999976	Never>E-cig>Smoker
TC01000242.hg.1	KLHDC7A	0.00129106	0.029636	0.57474	0.999976	Never>E-cig>Smoker
TC04001362.hg.1	KLHL8	6.54035e-10	2.54724e-07	0.603016	0.999976	Never>E-cig>Smoker
TC12000152.hg.1	KLRF1	0.00036448	0.0116649	0.0404104	0.999976	Smoker>E-cig>Never
TC11002900.hg.1	KMT2A	0.00189568	0.0390042	0.0725224	0.999976	Never>E-cig>Smoker
TC0X000216.hg.1	KRBOX4	0.00150938	0.0331945	0.54619	0.999976	Never>E-cig>Smoker
TC17001472.hg.1	KRT10	6.70435e-06	0.00051102	0.68594	0.999976	Smoker>E-cig>Never
TC12000424.hg.1	KRT18	2.26219e-07	3.4285e-05	0.942336	0.999976	Smoker>E-cig>Never
TC12001539.hg.1	KRT8	1.41546e-07	2.26839e-05	0.609792	0.999976	Smoker>E-cig>Never
TC08000415.hg.1	KRT8	1.66941e-06	0.000169955	0.821845	0.999976	Smoker>E-cig>Never
TC09000504.hg.1	KRT8P11	0.000152114	0.00605097	0.0160391	0.999976	Smoker>Never>E-cig
TC15002175.hg.1	KRTAP6-1	0.000146786	0.00585991	0.333207	0.999976	Smoker>E-cig>Never
TC14002325.hg.1	L3HYPDH	1.82008e-07	2.86205e-05	0.251659	0.999976	Smoker>E-cig>Never
TC01003784.hg.1	LAMB3	0.00128242	0.029636	0.489153	0.999976	Never>E-cig>Smoker
TC01001583.hg.1	LAMC1	5.50705e-05	0.00278844	0.277465	0.999976	Smoker>E-cig>Never
TC01002972.hg.1	LAMTOR5	0.00187622	0.0386722	0.297102	0.999976	Smoker>E-cig>Never
TC17000469.hg.1	LASP1	5.07477e-05	0.00260697	0.257118	0.999976	Smoker>E-cig>Never
TC06002214.hg.1	LATS1	0.00348965	0.0596948	0.543082	0.999976	Never>E-cig>Smoker
TC16001199.hg.1	LCAT	0.00194956	0.0396229	0.608772	0.999976	Never>E-cig>Smoker
TC16000283.hg.1	LCMT1	0.000118224	0.00492513	0.997082	0.999976	Smoker>E-cig>Never
TC10001617.hg.1	LDB1	0.0020509	0.041158	0.789535	0.999976	Never>E-cig>Smoker
TC22000224.hg.1	LIMK2	0.00344378	0.0592125	0.477451	0.999976	Never>E-cig>Smoker
TC14000455.hg.1	LIN52	0.000240333	0.00857265	0.793197	0.999976	Never>E-cig>Smoker
TC13000047.hg.1	LINC00327	0.000457154	0.0139073	0.497601	0.999976	Smoker>E-cig>Never
TC13000954.hg.1	LINC00327	0.00276468	0.0511603	0.637227	0.999976	Smoker>E-cig>Never
TC13000877.hg.1	LINC00346	9.65556e-05	0.00426653	0.20841	0.999976	Smoker>E-cig>Never
TC08002426.hg.1	LINC00535	2.91652e-05	0.00168424	0.15634	0.999976	Never>E-cig>Smoker
TC08001425.hg.1	LINC00535	3.89291e-05	0.00210986	0.139364	0.999976	Never>E-cig>Smoker
TC08001100.hg.1	LINC00589	1.78254e-06	0.000179832	0.0029653	0.807477	Smoker>Never>E-cig
TC14001062.hg.1	LINC00639	0.000347275	0.0113479	0.597146	0.999976	Smoker>E-cig>Never
TC14001728.hg.1	LINC00643	4.34096e-06	0.000369965	0.077648	0.999976	Smoker>E-cig>Never
TC14000376.hg.1	LINC00643	6.40143e-05	0.00311065	0.533737	0.999976	Smoker>E-cig>Never
TC21000132.hg.1	LINC00649	9.0871e-05	0.0040636	0.797639	0.999976	E-cig>Never>Smoker
TC17001840.hg.1	LINC00673	5.86157e-06	0.000470529	0.358567	0.999976	Smoker>E-cig>Never
TC17001138.hg.1	LINC00675	7.77931e-06	0.000562765	0.368315	0.999976	Smoker>E-cig>Never
TC03003174.hg.1	LINC00886	0.000183098	0.00706529	0.518831	0.999976	Smoker>E-cig>Never
TC03001936.hg.1	LINC00886	0.0019646	0.0398079	0.369725	0.999976	Smoker>E-cig>Never
TC03000979.hg.1	LINC00888	7.79607e-05	0.00361305	0.493161	0.999976	Smoker>E-cig>Never
TC03002691.hg.1	LINC00888	0.00278836	0.0513997	0.639833	0.999976	Smoker>E-cig>Never
TC15001865.hg.1	LINC00930	0.000555104	0.015932	0.399828	0.999976	Smoker>E-cig>Never
TC12000015.hg.1	LINC00942	0.000852119	0.0219723	0.396245	0.999976	Smoker>Never>E-cig
TC01001628.hg.1	LINC01031	0.0065322	0.0925505	0.74977	0.999976	Never>E-cig>Smoker
TC01005644.hg.1	LINC01057	0.00183676	0.0380962	0.469427	0.999976	E-cig>Never>Smoker
TC01002889.hg.1	LINC01057	0.00551146	0.0823105	0.353121	0.999976	E-cig>Never>Smoker
TC04002386.hg.1	LINC01060	0.000504145	0.0149697	0.764132	0.999976	Smoker>E-cig>Never
TC04000927.hg.1	LINC01060	0.0021872	0.0430376	0.584587	0.999976	Smoker>E-cig>Never
TC01001358.hg.1	LINC01133	0.00551702	0.0823105	0.806956	0.999976	Smoker>E-cig>Never
TC05002049.hg.1	LINC01187	0.00144613	0.0320348	0.0811521	0.999976	Smoker>E-cig>Never
TC01000409.hg.1	LINC01225	0.00333827	0.0579681	0.947831	0.999976	Smoker>E-cig>Never
TC01004293.hg.1	LINC01225	0.00373988	0.0630734	0.619974	0.999976	Smoker>E-cig>Never
TC01000410.hg.1	LINC01226	5.52458e-05	0.00278844	0.921217	0.999976	Smoker>E-cig>Never
TC04001119.hg.1	LINC01258	0.000137639	0.00554641	0.937187	0.999976	Smoker>Never>E-cig
TC14000427.hg.1	LINC01269	1.48719e-10	6.82353e-08	0.838509	0.999976	Smoker>E-cig>Never
TC05001488.hg.1	LINC01336	0.00690416	0.0958756	0.562517	0.999976	Never>Smoker>E-cig
TC01006206.hg.1	LINC01354	0.000163085	0.00642631	0.998722	0.999976	Never>E-cig>Smoker
TC01002743.hg.1	LINC01359	0.00219169	0.0430549	0.374855	0.999976	Never>E-cig>Smoker
TC07001773.hg.1	LINC01392	0.00578105	0.0850521	0.577399	0.999976	Smoker>Never>E-cig
TC05002078.hg.1	LINC01484	0.000944064	0.0238285	0.481876	0.999976	Smoker>E-cig>Never
TC14002150.hg.1	LINC01550	0.00110737	0.0268187	0.0235889	0.999976	Never>E-cig>Smoker
TC14001492.hg.1	LINC01550	0.00244361	0.0463981	0.0274456	0.999976	Never>E-cig>Smoker
TC06002318.hg.1	LINC01558	0.00578546	0.0850521	0.324922	0.999976	Never>E-cig>Smoker
TC12002771.hg.1	LINC01559	0.00172776	0.0366218	0.190231	0.999976	Smoker>E-cig>Never
TC06000665.hg.1	LINC01564	1.24812e-06	0.000133988	0.38485	0.999976	Smoker>E-cig>Never
TC6_cox_hap2000114.hg.1	LINC01623	0.000642802	0.017764	0.736341	0.999976	Smoker>E-cig>Never
TC6_mcf_hap5000097.hg.1	LINC01623	0.000733903	0.0196494	0.745684	0.999976	Smoker>E-cig>Never
TC6_ssto_hap7000096.hg.1	LINC01623	0.000733903	0.0196494	0.745684	0.999976	Smoker>E-cig>Never
TC06001471.hg.1	LINC01623	0.00129183	0.029636	0.470904	0.999976	Smoker>E-cig>Never
TC6_apd_hap1000052.hg.1	LINC01623	0.00129183	0.029636	0.470904	0.999976	Smoker>E-cig>Never
TC6_dbb_hap3000103.hg.1	LINC01623	0.00129183	0.029636	0.470904	0.999976	Smoker>E-cig>Never
TC6_mann_hap4000092.hg.1	LINC01623	0.00129183	0.029636	0.470904	0.999976	Smoker>E-cig>Never
TC6_qbl_hap6000105.hg.1	LINC01623	0.00129183	0.029636	0.470904	0.999976	Smoker>E-cig>Never
TC05002103.hg.1	LMAN2	8.15261e-05	0.00373679	0.323466	0.999976	Smoker>E-cig>Never
TC01001313.hg.1	LMNA	0.00302187	0.0541255	0.80716	0.999976	Smoker>E-cig>Never
TC05000604.hg.1	LMNB1	0.0026642	0.0498239	0.844072	0.999976	Never>E-cig>Smoker
TC12002781.hg.1	LMO3	0.00102392	0.0254384	0.118242	0.999976	Never>E-cig>Smoker
TC01000830.hg.1	LMO4	1.45717e-06	0.000152521	0.00608553	0.999976	Never>E-cig>Smoker
TC01002116.hg.1	LOC100129534	2.99671e-05	0.0017187	0.89579	0.999976	Smoker>E-cig>Never
TC01005220.hg.1	LOC100129534	0.000558504	0.0160022	0.419943	0.999976	Smoker>E-cig>Never
TC02002517.hg.1	LOC100130256	0.00644416	0.0918546	0.803517	0.999976	Never>E-cig>Smoker
TC14001358.hg.1	LOC100131497	2.01232e-05	0.00122994	0.643674	0.999976	Smoker>E-cig>Never
TC09000264.hg.1	LOC100132167	0.000598303	0.01684	0.425274	0.999976	Never>E-cig>Smoker
TC02001902.hg.1	LOC100132215	7.27191e-05	0.00341128	0.0844487	0.999976	Smoker>E-cig>Never
TC02004270.hg.1	LOC100132215	0.00205558	0.041164	0.101775	0.999976	Smoker>E-cig>Never
TC11003237.hg.1	LOC100133315	0.00312947	0.0553559	0.395247	0.999976	Never>E-cig>Smoker
TC02004857.hg.1	LOC100286922	0.000925619	0.0234691	0.531037	0.999976	Smoker>Never>E-cig
TC02002885.hg.1	LOC100286922	0.00338709	0.058478	0.5694	0.999976	Smoker>E-cig>Never
TC19000219.hg.1	LOC100289333	2.92335e-08	6.04412e-06	0.627684	0.999976	Never>E-cig>Smoker
TC6_mann_hap4000080.hg.1	LOC100294145	0.0054711	0.081954	0.0819187	0.999976	Never>Smoker>E-cig
TC6_qbl_hap6000087.hg.1	LOC100294145	0.0054711	0.081954	0.0819187	0.999976	Never>Smoker>E-cig
TC07000071.hg.1	LOC100419773	0.00280525	0.0515804	0.897155	0.999976	Never>E-cig>Smoker
TC05000770.hg.1	LOC100505658	0.00646714	0.0919399	0.628253	0.999976	Smoker>E-cig>Never
TC05003442.hg.1	LOC100505841	0.000416269	0.0128978	0.591364	0.999976	Smoker>E-cig>Never
TC17002147.hg.1	LOC101927018	0.00216883	0.0427562	0.923543	0.999976	E-cig>Never>Smoker
TC13001163.hg.1	LOC101927121	0.000202547	0.00763323	0.439434	0.999976	Never>E-cig>Smoker
TC06004052.hg.1	LOC101927136	2.02895e-18	3.809e-14	0.248179	0.999976	Smoker>E-cig>Never
TC06003687.hg.1	LOC101927136	2.27444e-18	3.809e-14	0.294824	0.999976	Smoker>E-cig>Never
TC06004093.hg.1	LOC101927189	0.00149795	0.0330515	0.66814	0.999976	Never>E-cig>Smoker
TC06003699.hg.1	LOC101927211	0.0022119	0.0432742	0.0409038	0.999976	Smoker>E-cig>Never
TC06001829.hg.1	LOC101927211	0.00640129	0.0915477	0.0396356	0.999976	Smoker>E-cig>Never
TC02003758.hg.1	LOC101927482	0.00160364	0.0346978	0.22811	0.999976	Smoker>E-cig>Never
TC02001140.hg.1	LOC101927482	0.00333548	0.0579681	0.388648	0.999976	Smoker>E-cig>Never
TC17002722.hg.1	LOC101927539	0.00576267	0.0848832	0.342928	0.999976	Never>Smoker>E-cig
TC06002031.hg.1	LOC101927686	0.00693793	0.0961834	0.884125	0.999976	Never>E-cig>Smoker
TC01003982.hg.1	LOC101927765	0.000252961	0.00885099	0.666844	0.999976	Smoker>E-cig>Never
TC14002330.hg.1	LOC101928075	2.06231e-09	6.4556e-07	0.685744	0.999976	Smoker>E-cig>Never
TC04001736.hg.1	LOC101928314	0.00461985	0.0730927	0.848769	0.999976	Smoker>E-cig>Never
TC01002391.hg.1	LOC101928324	0.000452883	0.013815	0.155148	0.999976	Never>E-cig>Smoker
TC01005352.hg.1	LOC101928324	0.00519058	0.0789166	0.259671	0.999976	Never>E-cig>Smoker
TC12002159.hg.1	LOC101928597	0.0023146	0.0448242	0.479494	0.999976	Never>E-cig>Smoker
TC03002035.hg.1	LOC101928739	0.00286967	0.0522652	0.00772471	0.999976	E-cig>Never>Smoker
TC03003224.hg.1	LOC101928739	0.00716512	0.0984366	0.136604	0.999976	E-cig>Never>Smoker
TC09000600.hg.1	LOC101928797	6.80147e-05	0.00325441	0.222875	0.999976	Never>E-cig>Smoker
TC05001431.hg.1	LOC101928885	8.33514e-13	7.54533e-10	0.477538	0.999976	Smoker>E-cig>Never
TC05003044.hg.1	LOC101928885	5.9271e-11	3.00791e-08	0.549988	0.999976	Smoker>E-cig>Never
TC19002409.hg.1	LOC101929144	0.00511301	0.0780918	0.065713	0.999976	Never>E-cig>Smoker
TC03002355.hg.1	LOC101929159	0.000646238	0.0178443	0.548949	0.999976	Smoker>E-cig>Never
TC07001682.hg.1	LOC102724094	1.57264e-09	5.21524e-07	0.306498	0.999976	Smoker>E-cig>Never
TC14000150.hg.1	LOC102724814	0.00162312	0.0349906	0.875718	0.999976	Never>E-cig>Smoker
TC14002054.hg.1	LOC105370541	0.00285334	0.0520816	0.975152	0.999976	Smoker>E-cig>Never
TC15002711.hg.1	LOC105370978	8.50763e-07	0.000101048	0.486424	0.999976	Smoker>E-cig>Never
TC20000955.hg.1	LOC105372670	0.00657793	0.0928058	0.446196	0.999976	Never>E-cig>Smoker
TC03001915.hg.1	LOC105374165	1.97783e-11	1.18296e-08	0.5887	0.999976	Smoker>E-cig>Never
TC07000500.hg.1	LOC105375368	2.24008e-12	1.74486e-09	0.750701	0.999976	Smoker>E-cig>Never
TC09002596.hg.1	LOC105376081	0.00121568	0.0287024	0.479546	0.999976	Never>E-cig>Smoker
TC01004199.hg.1	LOC105376796	0.00682038	0.0949863	0.961842	0.999976	Never>E-cig>Smoker
TC16001602.hg.1	LOC106699570	0.00376999	0.0634054	0.458602	0.999976	Smoker>E-cig>Never
TC05002354.hg.1	LOC153684	0.000814817	0.0213048	0.207394	0.999976	E-cig>Never>Smoker
TC05000195.hg.1	LOC153684	0.00565306	0.0838174	0.126258	0.999976	E-cig>Never>Smoker
TC05003384.hg.1	LOC153811	0.000209659	0.00782322	0.701508	0.999976	Never>E-cig>Smoker
TC11001218.hg.1	LOC283177	1.42273e-05	0.000932543	0.632981	0.999976	Never>E-cig>Smoker
TC11002974.hg.1	LOC283177	0.000112242	0.00475132	0.599948	0.999976	Never>E-cig>Smoker
TC12002671.hg.1	LOC283352	0.00376537	0.0634054	0.691087	0.999976	Smoker>E-cig>Never
TC13001292.hg.1	LOC283485	0.000496697	0.0148274	0.907864	0.999976	Smoker>E-cig>Never
TC15002771.hg.1	LOC283683	0.000712608	0.0192175	0.00386322	0.9328	Never>E-cig>Smoker
TC18000673.hg.1	LOC284244	0.000395586	0.0123599	0.198484	0.999976	Never>E-cig>Smoker
TC21000091.hg.1	LOC284825	1.7197e-14	2.74284e-11	0.76076	0.999976	Smoker>E-cig>Never
TC05002012.hg.1	LOC285629	6.9725e-07	8.67606e-05	0.755152	0.999976	Smoker>E-cig>Never
TC09001109.hg.1	LOC286297	0.00391323	0.0649182	0.577406	0.999976	Smoker>Never>E-cig
TC03001014.hg.1	LOC344887	3.69151e-14	4.94573e-11	0.960593	0.999976	Smoker>E-cig>Never
TC03002706.hg.1	LOC344887	1.97365e-13	2.20351e-10	0.539925	0.999976	Smoker>E-cig>Never
TC07003403.hg.1	LOC401320	4.40149e-05	0.00232529	0.308518	0.999976	Never>E-cig>Smoker
TC07003405.hg.1	LOC401320	0.00140526	0.0315537	0.315157	0.999976	Never>E-cig>Smoker
TC07002869.hg.1	LOC401320	0.00166512	0.0356595	0.59934	0.999976	Never>E-cig>Smoker
TC07003404.hg.1	LOC401320	0.0059377	0.0867617	0.367916	0.999976	Never>E-cig>Smoker
TC02003580.hg.1	LOC440910	0.000191393	0.0073167	0.571358	0.999976	Never>E-cig>Smoker
TC02000843.hg.1	LOC440910	0.00299971	0.0539303	0.87163	0.999976	Never>E-cig>Smoker
TC05003235.hg.1	LOC553103	0.0071507	0.0982789	0.0357789	0.999976	E-cig>Never>Smoker
TC12003027.hg.1	LOC643711	0.000301186	0.0101488	0.0338916	0.999976	Never>E-cig>Smoker
TC12001853.hg.1	LOC643711	0.000324456	0.0106962	0.0115892	0.999976	Never>E-cig>Smoker
TC0X000690.hg.1	LOC645188	0.000720078	0.0194033	0.728274	0.999976	Smoker>E-cig>Never
TC03002593.hg.1	LOC646903	0.00225248	0.0440166	0.627604	0.999976	Never>E-cig>Smoker
TC01005772.hg.1	LOC653513	3.24273e-05	0.00182848	0.29588	0.999976	Never>E-cig>Smoker
TC11002863.hg.1	LOC728196	0.00576798	0.0849199	0.839805	0.999976	Never>E-cig>Smoker
TC02003174.hg.1	LOC728730	0.00599881	0.0873584	0.0504193	0.999976	E-cig>Smoker>Never
TC01000874.hg.1	LOC729970	5.69189e-06	0.000460493	0.746128	0.999976	Never>E-cig>Smoker
TC06002832.hg.1	LOC730101	0.00203314	0.0408716	0.747758	0.999976	Smoker>E-cig>Never
TC06000657.hg.1	LOC730101	0.00205621	0.041164	0.973139	0.999976	Smoker>E-cig>Never
TC02002137.hg.1	LONRF2	0.00144034	0.0320264	0.217132	0.999976	Never>E-cig>Smoker
TC18000484.hg.1	LOXHD1	3.08966e-11	1.69648e-08	0.732247	0.999976	Smoker>E-cig>Never
TC10001576.hg.1	LOXL4	0.000277632	0.00951086	0.873029	0.999976	Smoker>E-cig>Never
TC02000078.hg.1	LPIN1	1.20632e-07	1.97095e-05	0.354434	0.999976	Never>E-cig>Smoker
TC03002770.hg.1	LRCH3	9.18996e-05	0.00409806	0.160783	0.999976	Never>E-cig>Smoker
TC03001110.hg.1	LRCH3	0.00243044	0.0463056	0.575716	0.999976	Never>E-cig>Smoker
TC03001532.hg.1	LRIG1	0.00127134	0.0295195	0.984716	0.999976	Never>E-cig>Smoker
TC12002396.hg.1	LRP1	0.00424736	0.0687584	0.520422	0.999976	Never>E-cig>Smoker
TC06002217.hg.1	LRP11	0.000671829	0.0183692	0.701775	0.999976	Smoker>E-cig>Never
TC06002218.hg.1	LRP11	0.00182424	0.0380468	0.961666	0.999976	Smoker>E-cig>Never
TC11001728.hg.1	LRP4	0.000181854	0.00703349	0.529705	0.999976	Smoker>E-cig>Never
TC01002669.hg.1	LRP8	3.98801e-08	7.82714e-06	0.223188	0.999976	Smoker>E-cig>Never
TC03001985.hg.1	LRRC31	9.69051e-07	0.000111489	0.438691	0.999976	Smoker>E-cig>Never
TC17001604.hg.1	LRRC37A4P	0.00534833	0.0805835	0.158025	0.999976	Never>E-cig>Smoker
TC01000659.hg.1	LRRC42	0.000238072	0.0085466	0.188048	0.999976	Smoker>E-cig>Never
TC12000970.hg.1	LRRC43	0.000794434	0.0209362	0.822887	0.999976	Never>E-cig>Smoker
TC17001687.hg.1	LRRC59	2.58404e-05	0.00152915	0.299916	0.999976	Smoker>E-cig>Never
TC01000841.hg.1	LRRC8D	3.39165e-10	1.43797e-07	0.93562	0.999976	Smoker>E-cig>Never
TC03001286.hg.1	LRRFIP2	0.00100008	0.0249417	0.982666	0.999976	Smoker>E-cig>Never
TC15000973.hg.1	LRRK1	0.00178849	0.0375101	0.687787	0.999976	E-cig>Never>Smoker
TC12000309.hg.1	LRRK2	0.000905592	0.0231457	0.264605	0.999976	Never>E-cig>Smoker
TC08001142.hg.1	LSM1	0.00496968	0.076752	0.754947	0.999976	Smoker>E-cig>Never
TC07003292.hg.1	LSMEM1	0.00240126	0.0459829	0.704465	0.999976	Smoker>E-cig>Never
TC02000219.hg.1	LTBP1	0.00193838	0.0395986	0.394796	0.999976	Never>E-cig>Smoker
TC11001934.hg.1	LTBP3	0.00180503	0.0377569	0.792647	0.999976	Never>E-cig>Smoker
TC03001357.hg.1	LTF	0.000145174	0.00581634	0.763877	0.999976	Never>E-cig>Smoker
TC05001589.hg.1	LUCAT1	3.33079e-12	2.37365e-09	0.520475	0.999976	Smoker>E-cig>Never
TC08002559.hg.1	LYNX1	4.76431e-07	6.33237e-05	0.696956	0.999976	Never>E-cig>Smoker
TC08001704.hg.1	LYPD2	0.000520241	0.0152985	0.547802	0.999976	Never>E-cig>Smoker
TC19001586.hg.1	LYPD3	0.0028284	0.0518242	0.503743	0.999976	Smoker>E-cig>Never
TC02000928.hg.1	LYPD6B	0.00127177	0.0295195	0.872707	0.999976	Never>E-cig>Smoker
TC08001218.hg.1	LYPLA1	0.000276536	0.00949006	0.858623	0.999976	Smoker>E-cig>Never
TC20000096.hg.1	MACROD2	0.000962336	0.0241804	0.319359	0.999976	Smoker>Never>E-cig
TC0X000296.hg.1	MAGED1	1.47354e-07	2.35022e-05	0.45951	0.999976	Smoker>E-cig>Never
TC0X000298.hg.1	MAGED4	0.00202765	0.0408137	0.810335	0.999976	Smoker>E-cig>Never
TC07002431.hg.1	MAGI2-AS3	0.000211844	0.00788388	0.923437	0.999976	Never>E-cig>Smoker
TC07000505.hg.1	MAGI2-AS3	0.00159275	0.0345292	0.740403	0.999976	Never>E-cig>Smoker
TC02002194.hg.1	MALL	6.82004e-05	0.00325864	0.279934	0.999976	Never>E-cig>Smoker
TC11002211.hg.1	MAML2	1.1944e-05	0.000809825	0.768708	0.999976	Never>E-cig>Smoker
TC03000319.hg.1	MANF	0.00408178	0.0668951	0.215572	0.999976	Smoker>E-cig>Never
TC12001253.hg.1	MANSC1	0.00213963	0.0422637	0.0734488	0.999976	Smoker>E-cig>Never
TC0X000978.hg.1	MAOB	4.97605e-06	0.000413568	0.456727	0.999976	Never>E-cig>Smoker
TC15000329.hg.1	MAP1A	1.12412e-06	0.000124261	0.210251	0.999976	Smoker>E-cig>Never
TC05000336.hg.1	MAP1B	6.70447e-06	0.00051102	0.678304	0.999976	Smoker>E-cig>Never
TC05002434.hg.1	MAP1B	2.56216e-05	0.00152158	0.623867	0.999976	Smoker>E-cig>Never
TC05000243.hg.1	MAP3K1	4.48116e-05	0.00235623	0.354193	0.999976	Never>E-cig>Smoker
TC17000770.hg.1	MAP3K3	0.00036192	0.0116447	0.265065	0.999976	Never>E-cig>Smoker
TC14002071.hg.1	MAP3K9	3.45528e-05	0.00191291	0.488009	0.999976	Smoker>Never>E-cig
TC14001272.hg.1	MAP3K9	0.00570263	0.0842169	0.464284	0.999976	Smoker>E-cig>Never
TC18000142.hg.1	MAPRE2	0.00263913	0.0494103	0.93082	0.999976	Smoker>E-cig>Never
TC01001819.hg.1	MARC2	0.00556587	0.0827445	0.763803	0.999976	Never>Smoker>E-cig
TC02002754.hg.1	MARCH4	0.00357655	0.0607777	0.485698	0.999976	Smoker>Never>E-cig
TC01001817.hg.1	MARK1	0.00324521	0.0569382	0.21799	0.999976	Never>E-cig>Smoker
TC01000577.hg.1	MAST2	0.00357548	0.0607777	0.379904	0.999976	Smoker>E-cig>Never
TC08000598.hg.1	MATN2	1.41945e-09	4.80233e-07	0.876563	0.999976	Smoker>E-cig>Never
TC22000697.hg.1	MB	1.12503e-05	0.000770585	0.439438	0.999976	Never>E-cig>Smoker
TC03002118.hg.1	MB21D2	7.27235e-06	0.000540089	0.341676	0.999976	Smoker>E-cig>Never
TC18000512.hg.1	MBD1	0.00389482	0.0647268	0.78727	0.999976	E-cig>Never>Smoker
TC19001837.hg.1	MBOAT7	0.00679831	0.0947778	0.789377	0.999976	Smoker>E-cig>Never
TC6_qbl_hap6000131.hg.1	MDC1	0.00115168	0.0276073	0.612668	0.999976	Never>E-cig>Smoker
TC6_mann_hap4000119.hg.1	MDC1	0.00134536	0.0306321	0.591552	0.999976	Never>E-cig>Smoker
TC6_cox_hap2000141.hg.1	MDC1	0.00146196	0.0323427	0.564958	0.999976	Never>E-cig>Smoker
TC6_mcf_hap5000120.hg.1	MDC1	0.00180702	0.0377569	0.556879	0.999976	Never>E-cig>Smoker
TC6_ssto_hap7000121.hg.1	MDC1	0.00180702	0.0377569	0.556879	0.999976	Never>E-cig>Smoker
TC06001507.hg.1	MDC1	0.00183902	0.0380962	0.608798	0.999976	Never>E-cig>Smoker
TC6_apd_hap1000077.hg.1	MDC1	0.00196422	0.0398079	0.544154	0.999976	Never>E-cig>Smoker
TC6_dbb_hap3000130.hg.1	MDC1	0.00196422	0.0398079	0.544154	0.999976	Never>E-cig>Smoker
TC06001912.hg.1	ME1	7.08303e-15	1.48274e-11	0.764117	0.999976	Smoker>E-cig>Never
TC0X000382.hg.1	MED12	0.000106416	0.00456959	0.147969	0.999976	Never>E-cig>Smoker
TC0X001752.hg.1	MED12	0.00650443	0.0921961	0.250854	0.999976	Never>E-cig>Smoker
TC14002329.hg.1	MED6	3.02628e-06	0.000278468	0.926768	0.999976	Smoker>E-cig>Never
TC05001579.hg.1	MEF2C	6.29547e-08	1.1276e-05	0.782868	0.999976	Never>E-cig>Smoker
TC09001537.hg.1	MEGF9	2.29304e-06	0.000222058	0.871799	0.999976	Smoker>E-cig>Never
TC02000386.hg.1	MEIS1	0.00678074	0.0947098	0.214353	0.999976	Never>E-cig>Smoker
TC06000631.hg.1	MEP1A	1.85954e-11	1.13243e-08	0.795294	0.999976	Smoker>E-cig>Never
TC02000701.hg.1	MERTK	0.000841683	0.0218295	0.73488	0.999976	Never>E-cig>Smoker
TC02003503.hg.1	MERTK	0.00591527	0.086518	0.756076	0.999976	Never>E-cig>Smoker
TC07000722.hg.1	MET	0.000192437	0.0073411	0.338792	0.999976	Never>E-cig>Smoker
TC02001025.hg.1	METAP1D	0.000211139	0.0078664	0.649984	0.999976	Never>E-cig>Smoker
TC11002614.hg.1	METTL15	0.00158767	0.0344425	0.65543	0.999976	Smoker>E-cig>Never
TC12000399.hg.1	METTL7A	0.000972505	0.0243264	0.753534	0.999976	Never>E-cig>Smoker
TC16000235.hg.1	METTL9	0.00123127	0.0288792	0.114058	0.999976	Smoker>E-cig>Never
TC04001729.hg.1	MFAP3L	0.000300771	0.0101488	0.689335	0.999976	Never>E-cig>Smoker
TC01000503.hg.1	MFSD2A	6.95376e-06	0.00052457	0.569699	0.999976	Smoker>E-cig>Never
TC02001119.hg.1	MFSD6	0.00625792	0.0900742	0.334205	0.999976	Smoker>E-cig>Never
TC02002148.hg.1	MFSD9	0.00611623	0.0883385	0.50934	0.999976	Smoker>E-cig>Never
TC07000899.hg.1	MGAM	0.006004	0.087396	0.0805348	0.999976	Smoker>E-cig>Never
TC14000275.hg.1	MGAT2	0.000766193	0.0203512	0.512747	0.999976	Smoker>E-cig>Never
TC03001750.hg.1	MGLL	4.31663e-08	8.21484e-06	0.247539	0.999976	Never>E-cig>Smoker
TC12001276.hg.1	MGP	0.00055419	0.0159262	0.407863	0.999976	Never>E-cig>Smoker
TC12002778.hg.1	MGP	0.00307005	0.0546606	0.255722	0.999976	Never>E-cig>Smoker
TC12000207.hg.1	MGST1	0.00123545	0.0288792	0.418392	0.999976	Smoker>Never>E-cig
TC12002266.hg.1	MGST1	0.00168164	0.035917	0.544956	0.999976	Smoker>Never>E-cig
TC01001829.hg.1	MIA3	0.00243982	0.0463525	0.782647	0.999976	Smoker>E-cig>Never
TC08000752.hg.1	MIR1205	0.00240123	0.0459829	0.542088	0.999976	Smoker>E-cig>Never
TC08000754.hg.1	MIR1206	5.05585e-07	6.66696e-05	0.808329	0.999976	Smoker>E-cig>Never
TC03000233.hg.1	MIR138-1	0.00136557	0.030967	0.732602	0.999976	E-cig>Never>Smoker
TC01003670.hg.1	MIR181A1HG	5.23674e-06	0.000430956	0.581369	0.999976	Smoker>Never>E-cig
TC01006424.hg.1	MIR181A1HG	0.000571325	0.016253	0.81807	0.999976	Smoker>Never>E-cig
TC01003671.hg.1	MIR181B1	0.00576295	0.0848832	0.757038	0.999976	Smoker>Never>E-cig
TC09000689.hg.1	MIR219B	0.00127795	0.0296029	0.674556	0.999976	Smoker>E-cig>Never
TC17000983.hg.1	MIR22HG	1.96763e-05	0.00120703	0.414165	0.999976	Smoker>E-cig>Never
TC17002437.hg.1	MIR22HG	0.000364636	0.0116649	0.77892	0.999976	Smoker>E-cig>Never
TC12001638.hg.1	MIR26A2	0.00472087	0.0742002	0.326314	0.999976	E-cig>Never>Smoker
TC08001667.hg.1	MIR30D	0.0062083	0.0895139	0.263178	0.999976	E-cig>Never>Smoker
TC01000516.hg.1	MIR30E	0.00681278	0.0949198	0.594477	0.999976	Never>E-cig>Smoker
TC13000706.hg.1	MIR3169	0.00113671	0.0273513	0.000755652	0.301307	Smoker>Never>E-cig
TC09002426.hg.1	MIR31HG	0.00590954	0.0864719	0.898676	0.999976	Smoker>E-cig>Never
TC11000995.hg.1	MIR34B	0.000117168	0.00489331	0.913392	0.999976	Never>E-cig>Smoker
TC02002784.hg.1	MIR375	0.00465416	0.0734621	0.472527	0.999976	Smoker>E-cig>Never
TC19001711.hg.1	MIR4324	0.0067591	0.0945578	0.94021	0.999976	Never>E-cig>Smoker
TC03000581.hg.1	MIR4446	0.00607581	0.0880204	0.22419	0.999976	Never>E-cig>Smoker
TC08000555.hg.1	MIR4661	5.37352e-06	0.00044005	0.61265	0.999976	Smoker>E-cig>Never
TC17001757.hg.1	MIR4737	0.00331022	0.057746	0.662588	0.999976	Never>E-cig>Smoker
TC20000237.hg.1	MIR4755	0.000864124	0.0222296	0.754554	0.999976	Smoker>E-cig>Never
TC20000961.hg.1	MIR4756	0.00483238	0.0754571	0.559173	0.999976	E-cig>Smoker>Never
TC04000007.hg.1	MIR571	0.000349622	0.0114135	0.557711	0.999976	E-cig>Never>Smoker
TC13000320.hg.1	MIR622	9.04255e-05	0.0040545	0.7811	0.999976	Smoker>E-cig>Never
TC17001823.hg.1	MIR635	0.000408697	0.0127102	0.74266	0.999976	Never>E-cig>Smoker
TC21000040.hg.1	MIR99AHG	0.00185135	0.0382772	0.225438	0.999976	Never>E-cig>Smoker
TC21000589.hg.1	MIR99AHG	0.0023408	0.045215	0.316039	0.999976	Never>E-cig>Smoker
TC10001756.hg.1	MKI67	0.00289813	0.0526125	0.357553	0.999976	Smoker>E-cig>Never
TC06002319.hg.1	MLLT4-AS1	0.00235913	0.0454575	0.310335	0.999976	Never>E-cig>Smoker
TC02001441.hg.1	MLPH	0.000774783	0.0205361	0.854534	0.999976	Smoker>E-cig>Never
TC16000651.hg.1	MLYCD	0.00402814	0.0663317	0.766807	0.999976	Smoker>E-cig>Never
TC12001952.hg.1	MMAB	0.00208002	0.0414691	0.530974	0.999976	Smoker>E-cig>Never
TC01000573.hg.1	MMACHC	6.83898e-05	0.00326303	0.194497	0.999976	Never>E-cig>Smoker
TC11002233.hg.1	MMP10	0.00120639	0.0285158	0.713442	0.999976	Never>E-cig>Smoker
TC11002239.hg.1	MMP13	0.00067406	0.0183854	0.349711	0.999976	Smoker>E-cig>Never
TC11002228.hg.1	MMP7	0.00320838	0.0564398	0.661433	0.999976	Never>E-cig>Smoker
TC0X001257.hg.1	MORC4	0.000103665	0.00448648	0.657217	0.999976	Smoker>E-cig>Never
TC02004959.hg.1	MORN2	0.000409112	0.0127113	0.799156	0.999976	Smoker>E-cig>Never
TC09000612.hg.1	MORN5	0.00178273	0.0374571	0.817576	0.999976	Smoker>E-cig>Never
TC01003484.hg.1	MPC2	0.000268233	0.00929079	0.99144	0.999976	Smoker>E-cig>Never
TC01005919.hg.1	MPC2	0.00393274	0.0651128	0.652587	0.999976	Smoker>E-cig>Never
TC10001136.hg.1	MPP7	0.00263202	0.0493048	0.801084	0.999976	Never>E-cig>Smoker
TC16000189.hg.1	MPV17L	0.00240599	0.0459967	0.892925	0.999976	Never>E-cig>Smoker
TC19000353.hg.1	MPV17L2	0.00273565	0.0507916	0.66048	0.999976	Smoker>E-cig>Never
TC06000777.hg.1	MRAP2	2.15138e-08	4.64891e-06	0.886831	0.999976	Smoker>E-cig>Never
TC02003896.hg.1	MROH2A	0.00706517	0.0974633	0.555203	0.999976	Smoker>Never>E-cig
TC15000837.hg.1	MRPS11	0.00160467	0.0346978	0.298025	0.999976	Smoker>E-cig>Never
TC07001928.hg.1	MRPS33	0.000169794	0.00667499	0.691651	0.999976	Smoker>E-cig>Never
TC05000300.hg.1	MRPS36	0.00303877	0.0542194	0.48974	0.999976	Smoker>E-cig>Never
TC11001840.hg.1	MS4A4E	0.00346475	0.0594264	0.639158	0.999976	Never>E-cig>Smoker
TC6_qbl_hap6000068.hg.1	MSH5	0.00477726	0.0748408	0.23041	0.999976	E-cig>Never>Smoker
TC16001373.hg.1	MSLN	0.0058863	0.0861695	0.123623	0.999976	Smoker>E-cig>Never
TC10000337.hg.1	MSMB	9.53063e-08	1.60411e-05	0.24137	0.999976	Smoker>E-cig>Never
TC16000766.hg.1	MSRB1	9.18086e-07	0.000107144	0.883754	0.999976	Smoker>E-cig>Never
TC16002035.hg.1	MT1A	1.48672e-05	0.000961317	0.428408	0.999976	Never>E-cig>Smoker
TC16000472.hg.1	MT1B	0.00646606	0.0919399	0.956439	0.999976	Never>E-cig>Smoker
TC16000470.hg.1	MT1DP	0.00235228	0.0453844	0.929856	0.999976	Never>E-cig>Smoker
TC16000468.hg.1	MT1E	0.000227223	0.00825447	0.876225	0.999976	Never>E-cig>Smoker
TC16000473.hg.1	MT1F	1.246e-05	0.000841401	0.954588	0.999976	Never>E-cig>Smoker
TC16001135.hg.1	MT1G	1.96532e-05	0.00120703	0.787687	0.999976	Never>E-cig>Smoker
TC16000474.hg.1	MT1H	2.13542e-05	0.00129261	0.900934	0.999976	Never>E-cig>Smoker
TC01006221.hg.1	MT1HL1	0.000708864	0.0191783	0.47115	0.999976	Never>E-cig>Smoker
TC16000475.hg.1	MT1IP	0.00555475	0.082648	0.970956	0.999976	Never>E-cig>Smoker
TC16000469.hg.1	MT1JP	8.54558e-05	0.00388894	0.977526	0.999976	Never>E-cig>Smoker
TC16001576.hg.1	MT1JP	0.000179717	0.00697501	0.903758	0.999976	Never>E-cig>Smoker
TC16001575.hg.1	MT1L	0.00081241	0.0212585	0.689807	0.999976	Never>E-cig>Smoker
TC16002075.hg.1	MT1L	0.00100329	0.0250032	0.804404	0.999976	Never>E-cig>Smoker
TC16002074.hg.1	MT1M	6.42991e-05	0.00311669	0.840667	0.999976	Never>E-cig>Smoker
TC16000476.hg.1	MT1X	4.86959e-05	0.00252871	0.429054	0.999976	Never>E-cig>Smoker
TC16002034.hg.1	MT2A	0.000335536	0.0109965	0.921718	0.999976	Never>E-cig>Smoker
TC16000465.hg.1	MT3	0.00632093	0.0907471	0.525712	0.999976	Never>E-cig>Smoker
TC08000434.hg.1	MTFR1	0.00655229	0.0926392	0.262027	0.999976	Smoker>E-cig>Never
TC02003335.hg.1	MTHFD2	0.000366909	0.0116929	0.818517	0.999976	Smoker>E-cig>Never
TC02000454.hg.1	MTHFD2	0.000384497	0.0120924	0.950163	0.999976	Smoker>E-cig>Never
TC17001734.hg.1	MTMR4	0.0052898	0.0799534	0.453819	0.999976	Never>E-cig>Smoker
TC0X002333.hg.1	MTMR8	0.00284638	0.0519933	0.347288	0.999976	Never>E-cig>Smoker
TC01001956.hg.1	MTR	0.00289467	0.0525781	0.647261	0.999976	Never>E-cig>Smoker
TC0X001079.hg.1	MTRNR2L10	0.00286347	0.0521813	0.63489	0.999976	Smoker>Never>E-cig
TC07000914.hg.1	MTRNR2L6	0.00236981	0.0455942	0.603483	0.999976	Smoker>Never>E-cig
TC08001602.hg.1	MTSS1	0.000342188	0.0111926	0.259175	0.999976	Never>E-cig>Smoker
TC08002510.hg.1	MTSS1	0.00239409	0.0459274	0.585286	0.999976	Never>E-cig>Smoker
TC13000093.hg.1	MTUS2	0.00483519	0.0754659	0.0498936	0.999976	Never>E-cig>Smoker
TC11000039.hg.1	MUC2	8.35583e-05	0.00381294	0.405668	0.999976	Smoker>E-cig>Never
TC11002494.hg.1	MUC2	0.0001066	0.00457165	0.518387	0.999976	Smoker>E-cig>Never
TC11002988.hg.1	MUC2	0.00105937	0.0259945	0.215192	0.999976	Smoker>E-cig>Never
TC11003511.hg.1	MUC5AC	3.45986e-08	6.93919e-06	0.122639	0.999976	Smoker>E-cig>Never
TC11000041.hg.1	MUC5AC	4.68435e-08	8.76523e-06	0.119077	0.999976	Smoker>E-cig>Never
TC11002496.hg.1	MUC5AC	1.33192e-07	2.14477e-05	0.112776	0.999976	Smoker>E-cig>Never
TC11002495.hg.1	MUC5AC	1.78804e-07	2.82493e-05	0.880018	0.999976	E-cig>Never>Smoker
TC11002499.hg.1	MUC5B	6.30841e-10	2.48581e-07	0.711683	0.999976	E-cig>Never>Smoker
TC11003510.hg.1	MUC5B	1.92992e-09	6.09818e-07	0.595872	0.999976	E-cig>Never>Smoker
TC11002497.hg.1	MUC5B	2.77486e-09	8.08183e-07	0.380773	0.999976	E-cig>Never>Smoker
TC11002498.hg.1	MUC5B	4.30053e-09	1.19043e-06	0.341443	0.999976	E-cig>Never>Smoker
TC12000471.hg.1	MUCL1	5.08625e-16	2.00421e-12	0.611597	0.999976	Smoker>E-cig>Never
TC19001933.hg.1	MUM1	0.000819828	0.0214024	0.425159	0.999976	Never>E-cig>Smoker
TC19000036.hg.1	MUM1	0.00690428	0.0958756	0.371365	0.999976	Never>E-cig>Smoker
TC19001067.hg.1	MYDGF	0.000121411	0.00503285	0.439431	0.999976	Smoker>E-cig>Never
TC16001085.hg.1	MYLK3	1.03569e-05	0.000718209	0.0608911	0.999976	Smoker>E-cig>Never
TC13000384.hg.1	MYO16	6.7406e-06	0.000511949	0.924698	0.999976	Smoker>E-cig>Never
TC18000507.hg.1	MYO5B	8.27064e-07	9.85825e-05	0.361098	0.999976	Smoker>E-cig>Never
TC13001722.hg.1	N4BP2L1	0.00187454	0.0386613	0.391663	0.999976	Never>E-cig>Smoker
TC20000135.hg.1	NAA20	9.59527e-16	2.83924e-12	0.63073	0.999976	Smoker>E-cig>Never
TC17001095.hg.1	NAA38	0.00326527	0.0571406	0.741177	0.999976	Smoker>E-cig>Never
TC19000236.hg.1	NACC1	0.00339693	0.0585271	0.857528	0.999976	Smoker>E-cig>Never
TC01002107.hg.1	NADK	4.23371e-07	5.78792e-05	0.603244	0.999976	Smoker>E-cig>Never
TC17000953.hg.1	NARF	0.000471222	0.0141945	0.962014	0.999976	Smoker>E-cig>Never
TC01001661.hg.1	NAV1	0.000125554	0.00515987	0.795722	0.999976	Smoker>E-cig>Never
TC12000656.hg.1	NAV3	0.0053734	0.0808521	0.243043	0.999976	Never>E-cig>Smoker
TC02001195.hg.1	NBEAL1	0.000112447	0.00475132	0.804408	0.999976	Never>E-cig>Smoker
TC11002473.hg.1	NCAPD3	0.00149273	0.0329799	0.234156	0.999976	Never>E-cig>Smoker
TC03002170.hg.1	NCBP2	0.00318839	0.0562063	0.658186	0.999976	E-cig>Smoker>Never
TC01000458.hg.1	NCDN	0.0062144	0.0895634	0.720758	0.999976	Never>E-cig>Smoker
TC04001509.hg.1	NDNF	6.95307e-05	0.00330804	0.43953	0.999976	Never>E-cig>Smoker
TC05001862.hg.1	NDUFA2	0.00339585	0.0585271	0.881567	0.999976	Smoker>E-cig>Never
TC09001554.hg.1	NDUFA8	1.41604e-05	0.000929981	0.562151	0.999976	Smoker>Never>E-cig
TC08000579.hg.1	NDUFAF6	0.000653482	0.017985	0.0269522	0.999976	E-cig>Never>Smoker
TC02001171.hg.1	NDUFB3	0.000124576	0.005126	0.996386	0.999976	Smoker>E-cig>Never
TC03000617.hg.1	NDUFB4	0.000382177	0.012076	0.633958	0.999976	Smoker>E-cig>Never
TC04002949.hg.1	NDUFC1	0.00116856	0.027818	0.639463	0.999976	Smoker>E-cig>Never
TC18000041.hg.1	NDUFV2	0.00634896	0.0909158	0.38917	0.999976	Smoker>E-cig>Never
TC18000731.hg.1	NEDD4L	0.000240883	0.00858215	0.843755	0.999976	Never>E-cig>Smoker
TC14002343.hg.1	NEDD8	9.94092e-05	0.00436384	0.264982	0.999976	Smoker>E-cig>Never
TC14001936.hg.1	NEDD8	0.00292537	0.052966	0.223369	0.999976	Smoker>E-cig>Never
TC02002620.hg.1	NEMP2	0.00720832	0.0988274	0.395897	0.999976	Never>E-cig>Smoker
TC06001548.hg.1	NEU1	0.00143325	0.031961	0.901099	0.999976	Smoker>E-cig>Never
TC6_apd_hap1000089.hg.1	NEU1	0.00143325	0.031961	0.901099	0.999976	Smoker>E-cig>Never
TC6_dbb_hap3000164.hg.1	NEU1	0.00143325	0.031961	0.901099	0.999976	Smoker>E-cig>Never
TC6_mann_hap4000146.hg.1	NEU1	0.00143325	0.031961	0.901099	0.999976	Smoker>E-cig>Never
TC6_mcf_hap5000150.hg.1	NEU1	0.00143325	0.031961	0.901099	0.999976	Smoker>E-cig>Never
TC6_qbl_hap6000165.hg.1	NEU1	0.00143325	0.031961	0.901099	0.999976	Smoker>E-cig>Never
TC6_ssto_hap7000144.hg.1	NEU1	0.00143325	0.031961	0.901099	0.999976	Smoker>E-cig>Never
TC6_cox_hap2000175.hg.1	NEU1	0.00198098	0.0400911	0.990621	0.999976	Smoker>E-cig>Never
TC11000797.hg.1	NEU3	0.00586095	0.085911	0.158605	0.999976	Never>E-cig>Smoker
TC01005566.hg.1	NEXN-AS1	0.00319885	0.0563057	0.195258	0.999976	E-cig>Smoker>Never
TC22000199.hg.1	NF2	0.00174371	0.0368247	0.225431	0.999976	E-cig>Smoker>Never
TC16000570.hg.1	NFAT5	8.15547e-05	0.00373679	0.364248	0.999976	Never>E-cig>Smoker
TC20000942.hg.1	NFATC2	2.43283e-06	0.000231492	0.146469	0.999976	Never>E-cig>Smoker
TC17000619.hg.1	NFE2L1	6.42539e-06	0.000497026	0.276383	0.999976	Smoker>E-cig>Never
TC09000916.hg.1	NFIB	0.000272193	0.00939878	0.244497	0.999976	Never>E-cig>Smoker
TC19000069.hg.1	NFIC	0.00293649	0.0530792	0.702237	0.999976	Never>E-cig>Smoker
TC04000526.hg.1	NFKB1	0.00123727	0.0288792	0.933693	0.999976	Never>E-cig>Smoker
TC14001036.hg.1	NFKBIA	2.55841e-07	3.75839e-05	0.281928	0.999976	Never>E-cig>Smoker
TC03003320.hg.1	NFKBIZ	0.00656069	0.0926693	0.237167	0.999976	Never>E-cig>Smoker
TC05002120.hg.1	NHP2	0.00139976	0.0314867	0.457467	0.999976	Smoker>Never>E-cig
TC14001123.hg.1	NIN	0.00101044	0.025144	0.898699	0.999976	Never>E-cig>Smoker
TC16001546.hg.1	NKD1	0.00297734	0.0536145	0.190124	0.999976	Smoker>E-cig>Never
TC08001057.hg.1	NKX3-1	5.89144e-06	0.000470529	0.238451	0.999976	E-cig>Smoker>Never
TC05000279.hg.1	NLN	0.000170036	0.00667664	0.240813	0.999976	Smoker>E-cig>Never
TC17002276.hg.1	NME1-NME2	0.00210953	0.0418581	0.779255	0.999976	Smoker>E-cig>Never
TC17002881.hg.1	NME2	0.00163401	0.0351506	0.608421	0.999976	Smoker>E-cig>Never
TC10001061.hg.1	NMT2	0.00165155	0.0353965	0.884005	0.999976	Never>E-cig>Smoker
TC04001216.hg.1	NMU	0.00144386	0.0320348	0.433426	0.999976	Smoker>E-cig>Never
TC07001050.hg.1	NOM1	0.00286167	0.0521768	0.767108	0.999976	E-cig>Never>Smoker
TC15001193.hg.1	NOP10	0.000132734	0.00539894	0.804618	0.999976	Smoker>Never>E-cig
TC17002562.hg.1	NOS2	9.99637e-05	0.004371	0.867762	0.999976	Never>E-cig>Smoker
TC17002894.hg.1	NOS2	0.000129639	0.00530175	0.998617	0.999976	Never>E-cig>Smoker
TC17002112.hg.1	NOS2P3	0.00510132	0.0780199	0.713684	0.999976	Never>E-cig>Smoker
TC19001250.hg.1	NOTCH3	0.00510036	0.0780199	0.710848	0.999976	Never>E-cig>Smoker
TC0X001211.hg.1	NOX1	1.61963e-05	0.00102742	0.698419	0.999976	Never>E-cig>Smoker
TC14000211.hg.1	NPAS3	6.60985e-05	0.00318547	0.899518	0.999976	Never>E-cig>Smoker
TC16001225.hg.1	NQO1	2.59989e-14	3.78612e-11	0.326945	0.999976	Smoker>E-cig>Never
TC04001627.hg.1	NR3C2	3.7092e-05	0.00203	0.456488	0.999976	Never>E-cig>Smoker
TC07001751.hg.1	NRCAM	3.20487e-06	0.00029329	0.830974	0.999976	Smoker>E-cig>Never
TC06000779.hg.1	NT5E	2.09964e-07	3.2112e-05	0.628331	0.999976	Never>E-cig>Smoker
TC17000143.hg.1	NTN1	3.99203e-08	7.82714e-06	0.590866	0.999976	Never>E-cig>Smoker
TC12001837.hg.1	NTN4	0.00176554	0.0371685	0.793428	0.999976	Smoker>E-cig>Never
TC12001916.hg.1	NUAK1	0.000449644	0.0137287	0.389747	0.999976	Never>E-cig>Smoker
TC01003745.hg.1	NUAK2	0.00437331	0.070254	0.35547	0.999976	Never>E-cig>Smoker
TC14000202.hg.1	NUBPL	0.00510733	0.0780762	0.802626	0.999976	Never>E-cig>Smoker
TC06004129.hg.1	NUDT3	0.000511781	0.015116	0.309851	0.999976	Never>E-cig>Smoker
TC12000724.hg.1	NUDT4	0.00598935	0.0872984	0.96613	0.999976	Smoker>E-cig>Never
TC11002049.hg.1	NUMA1	0.000160989	0.0063512	0.234799	0.999976	Never>E-cig>Smoker
TC22001384.hg.1	NUP50-AS1	0.00104714	0.0257333	0.201699	0.999976	E-cig>Never>Smoker
TC22000872.hg.1	NUP50-AS1	0.0072726	0.0995316	0.423241	0.999976	E-cig>Never>Smoker
TC11001880.hg.1	NXF1	0.00540236	0.0812094	0.879187	0.999976	Never>E-cig>Smoker
TC17000969.hg.1	NXN	2.76441e-05	0.00161028	0.842871	0.999976	Never>E-cig>Smoker
TC15001091.hg.1	OCA2	0.00145615	0.0322355	0.952747	0.999976	Smoker>E-cig>Never
TC04001180.hg.1	OCIAD2	3.64961e-05	0.00200393	0.634514	0.999976	Smoker>E-cig>Never
TC08000635.hg.1	ODF1	0.00103668	0.0256255	0.075123	0.999976	Never>E-cig>Smoker
TC0X000388.hg.1	OGT	0.00667743	0.0938145	0.332277	0.999976	Never>E-cig>Smoker
TC01003452.hg.1	OLFML2B	0.00342129	0.0588862	0.0561016	0.999976	Never>E-cig>Smoker
TC10000722.hg.1	OLMALINC	0.000116488	0.00487706	0.267516	0.999976	Never>E-cig>Smoker
TC09001335.hg.1	OMD	0.00276939	0.051183	0.0861918	0.999976	Never>E-cig>Smoker
TC11000414.hg.1	OR4X2	0.00642623	0.0917086	0.934217	0.999976	Smoker>E-cig>Never
TC03001269.hg.1	OSBPL10	0.000613443	0.0171365	0.268181	0.999976	Smoker>E-cig>Never
TC07001206.hg.1	OSBPL3	2.53095e-05	0.00151053	0.606061	0.999976	Never>E-cig>Smoker
TC02001071.hg.1	OSBPL6	2.81966e-05	0.00163677	0.814345	0.999976	Never>E-cig>Smoker
TC20000861.hg.1	OSER1	1.28702e-05	0.000862146	0.172128	0.999976	Smoker>E-cig>Never
TC16000652.hg.1	OSGIN1	3.28557e-07	4.64333e-05	0.75561	0.999976	Smoker>E-cig>Never
TC02001673.hg.1	OST4	0.00140555	0.0315537	0.905003	0.999976	Smoker>E-cig>Never
TC01003198.hg.1	OTUD7B	0.000449308	0.0137287	0.0152885	0.999976	Smoker>E-cig>Never
TC03001906.hg.1	P2RY13	0.00644019	0.0918546	0.730477	0.999976	Never>E-cig>Smoker
TC11000772.hg.1	P2RY2	0.00138732	0.0312908	0.443272	0.999976	Smoker>E-cig>Never
TC01002574.hg.1	P3H1	0.00192211	0.0393515	0.443901	0.999976	Smoker>E-cig>Never
TC11002079.hg.1	P4HA3	0.00386946	0.0644409	0.557669	0.999976	Never>E-cig>Smoker
TC17001960.hg.1	P4HB	0.00191846	0.0393009	0.426436	0.999976	Smoker>E-cig>Never
TC03001937.hg.1	PA2G4P4	0.00560524	0.0832189	0.702485	0.999976	Smoker>E-cig>Never
TC01002541.hg.1	PABPC4	0.000844661	0.0218295	0.809521	0.999976	Never>E-cig>Smoker
TC01000230.hg.1	PADI1	0.00720648	0.0988274	0.384211	0.999976	Smoker>E-cig>Never
TC11002893.hg.1	PAFAH1B2	3.85602e-05	0.00209325	0.74187	0.999976	Smoker>E-cig>Never
TC11001047.hg.1	PAFAH1B2	0.000500177	0.0148783	0.655385	0.999976	Smoker>E-cig>Never
TC0X000329.hg.1	PAGE5	0.00519388	0.078931	0.443428	0.999976	Smoker>E-cig>Never
TC05000711.hg.1	PAIP2	0.00610162	0.0882036	0.827903	0.999976	Smoker>E-cig>Never
TC04000839.hg.1	PALLD	0.00422833	0.0686067	0.896388	0.999976	Smoker>E-cig>Never
TC10001507.hg.1	PANK1	4.34522e-05	0.00229974	0.704787	0.999976	Never>E-cig>Smoker
TC22001176.hg.1	PANX2	3.04234e-09	8.70941e-07	0.583772	0.999976	Smoker>E-cig>Never
TC22000419.hg.1	PANX2	4.5917e-08	8.64013e-06	0.511806	0.999976	Smoker>E-cig>Never
TC05000045.hg.1	PAPD7	0.00549617	0.0821825	0.444225	0.999976	Never>E-cig>Smoker
TC04001455.hg.1	PAPSS1	0.00408433	0.0668951	0.912435	0.999976	Never>E-cig>Smoker
TC10000621.hg.1	PAPSS2	0.00175335	0.0369816	0.0735493	0.999976	Never>E-cig>Smoker
TC20000407.hg.1	PARD6B	3.57299e-05	0.00197156	0.597792	0.999976	Never>E-cig>Smoker
TC06002286.hg.1	PARK2	0.00646472	0.0919399	0.221985	0.999976	Never>E-cig>Smoker
TC04000416.hg.1	PARM1	0.0016003	0.034648	0.858252	0.999976	Smoker>E-cig>Never
TC11000201.hg.1	PARVA	0.000284387	0.00970973	0.0438853	0.999976	Never>E-cig>Smoker
TC22000370.hg.1	PARVB	0.000196814	0.00747402	0.69597	0.999976	Smoker>E-cig>Never
TC12001765.hg.1	PAWR	0.000117123	0.00489331	0.411266	0.999976	Smoker>E-cig>Never
TC6_cox_hap2000188.hg.1	PBX2	0.000497733	0.0148319	0.748746	0.999976	Never>E-cig>Smoker
TC6_mann_hap4000153.hg.1	PBX2	0.000497733	0.0148319	0.748746	0.999976	Never>E-cig>Smoker
TC6_qbl_hap6000177.hg.1	PBX2	0.000545957	0.015764	0.786281	0.999976	Never>E-cig>Smoker
TC6_ssto_hap7000157.hg.1	PBX2	0.00063434	0.0175882	0.753097	0.999976	Never>E-cig>Smoker
TC6_apd_hap1000096.hg.1	PBX2	0.000843751	0.0218295	0.780799	0.999976	Never>E-cig>Smoker
TC6_mcf_hap5000163.hg.1	PBX2	0.000843751	0.0218295	0.780799	0.999976	Never>E-cig>Smoker
TC06004050.hg.1	PBX2	0.00139084	0.0313491	0.653847	0.999976	Never>E-cig>Smoker
TC01003298.hg.1	PBXIP1	0.00553787	0.0824379	0.590514	0.999976	Smoker>E-cig>Never
TC02005029.hg.1	PCBP1-AS1	0.000918488	0.023359	0.517365	0.999976	Never>E-cig>Smoker
TC02004325.hg.1	PCBP1-AS1	0.00129149	0.029636	0.543199	0.999976	Never>E-cig>Smoker
TC12003242.hg.1	PCBP2	0.000441096	0.0135262	0.415554	0.999976	Never>E-cig>Smoker
TC13000234.hg.1	PCDH17	0.0025276	0.0476686	0.304878	0.999976	Never>E-cig>Smoker
TC13000707.hg.1	PCDH20	2.40425e-05	0.00144315	0.996498	0.999976	Never>E-cig>Smoker
TC04000196.hg.1	PCDH7	0.000384198	0.0120924	0.291029	0.999976	Never>E-cig>Smoker
TC10000652.hg.1	PCGF5	0.00501074	0.0771277	0.32014	0.999976	Never>E-cig>Smoker
TC15002009.hg.1	PCSK6	0.00283424	0.0518494	0.566974	0.999976	Never>E-cig>Smoker
TC03003400.hg.1	PCYT1A	3.94432e-05	0.00213125	0.191048	0.999976	Smoker>E-cig>Never
TC07001641.hg.1	PDAP1	0.000124286	0.00512106	0.881844	0.999976	Smoker>E-cig>Never
TC19000427.hg.1	PDCD5	0.000784045	0.0207104	0.711846	0.999976	Smoker>E-cig>Never
TC02000608.hg.1	PDCL3	5.75079e-05	0.00286632	0.00444453	0.999976	Smoker>E-cig>Never
TC07001256.hg.1	PDE1C	0.00100798	0.0251012	0.277395	0.999976	Smoker>E-cig>Never
TC19001980.hg.1	PDE4A	0.000297067	0.0100505	0.0941017	0.999976	Never>E-cig>Smoker
TC01003096.hg.1	PDE4DIP	1.65607e-05	0.00104657	0.6284	0.999976	Never>E-cig>Smoker
TC08001282.hg.1	PDE7A	5.8149e-07	7.43375e-05	0.703631	0.999976	Never>E-cig>Smoker
TC08002356.hg.1	PDE7A	0.0011965	0.028362	0.882339	0.999976	Never>E-cig>Smoker
TC06001015.hg.1	PDE7B	0.00106829	0.0261943	0.552855	0.999976	Never>E-cig>Smoker
TC15000824.hg.1	PDE8A	0.0003599	0.0116144	0.128321	0.999976	Never>E-cig>Smoker
TC04002799.hg.1	PDGFC	0.000178496	0.00693565	0.454055	0.999976	Never>E-cig>Smoker
TC04001673.hg.1	PDGFC	0.00029219	0.00993564	0.613561	0.999976	Never>E-cig>Smoker
TC07001995.hg.1	PDIA4	2.23026e-06	0.000217153	0.556642	0.999976	Smoker>E-cig>Never
TC0X001627.hg.1	PDK3	0.00105544	0.025917	0.679352	0.999976	E-cig>Never>Smoker
TC07001618.hg.1	PDK4	0.00527483	0.079799	0.407327	0.999976	Never>E-cig>Smoker
TC15001691.hg.1	PEAK1	0.00526612	0.0797394	0.611745	0.999976	Never>E-cig>Smoker
TC07000562.hg.1	PEG10	0.000563748	0.0160973	0.270573	0.999976	Never>E-cig>Smoker
TC02002914.hg.1	PER2	1.57537e-06	0.000162355	0.57384	0.999976	Never>E-cig>Smoker
TC6_mcf_hap5000094.hg.1	PFDN6	0.000971924	0.0243264	0.816838	0.999976	Smoker>E-cig>Never
TC6_cox_hap2000109.hg.1	PFDN6	0.00104547	0.0257289	0.9488	0.999976	Smoker>E-cig>Never
TC6_dbb_hap3000101.hg.1	PFDN6	0.00104547	0.0257289	0.9488	0.999976	Smoker>E-cig>Never
TC6_qbl_hap6000100.hg.1	PFDN6	0.00104547	0.0257289	0.9488	0.999976	Smoker>E-cig>Never
TC06000419.hg.1	PFDN6	0.00138621	0.0312908	0.976529	0.999976	Smoker>E-cig>Never
TC10000022.hg.1	PFKP	0.000933917	0.0236437	0.37974	0.999976	Smoker>E-cig>Never
TC03003395.hg.1	PFN2	2.54757e-06	0.000238348	0.831183	0.999976	Smoker>E-cig>Never
TC10000695.hg.1	PGAM1	0.00458242	0.0726721	0.74667	0.999976	Smoker>E-cig>Never
TC01000129.hg.1	PGD	1.18176e-10	5.57492e-08	0.259941	0.999976	Smoker>E-cig>Never
TC06001911.hg.1	PGM3	0.000579399	0.0164183	0.626181	0.999976	Smoker>E-cig>Never
TC09001167.hg.1	PGM5P2	0.00610721	0.0882462	0.0618898	0.999976	E-cig>Never>Smoker
TC19000355.hg.1	PGPEP1	0.00456876	0.0725586	0.919226	0.999976	Never>E-cig>Smoker
TC0X000580.hg.1	PGRMC1	0.00306711	0.0546435	0.290227	0.999976	Never>E-cig>Smoker
TC12000137.hg.1	PHC1	0.000104328	0.00450883	0.745434	0.999976	Never>E-cig>Smoker
TC03001988.hg.1	PHC3	0.00192994	0.0394636	0.537407	0.999976	Never>E-cig>Smoker
TC0X000102.hg.1	PHEX	8.65908e-16	2.83924e-12	0.69348	0.999976	Smoker>E-cig>Never
TC17001313.hg.1	PHF12	0.0038692	0.0644409	0.800038	0.999976	Never>E-cig>Smoker
TC09000450.hg.1	PHF2	0.00295715	0.0533379	0.842295	0.999976	Never>E-cig>Smoker
TC11001716.hg.1	PHF21A	0.00319908	0.0563057	0.765401	0.999976	Never>E-cig>Smoker
TC0X001070.hg.1	PHF8	0.000728478	0.019551	0.515629	0.999976	Never>E-cig>Smoker
TC16000427.hg.1	PHKB	0.000306403	0.0102306	0.875359	0.999976	Smoker>E-cig>Never
TC12001751.hg.1	PHLDA1	0.000668386	0.0183349	0.381031	0.999976	Smoker>E-cig>Never
TC16001250.hg.1	PHLPP2	0.000711705	0.0192175	0.998659	0.999976	Never>E-cig>Smoker
TC01003004.hg.1	PHTF1	5.96179e-05	0.00295391	0.429935	0.999976	Smoker>E-cig>Never
TC07000498.hg.1	PHTF2	2.12375e-05	0.00128964	0.492722	0.999976	Smoker>E-cig>Never
TC10001048.hg.1	PHYH	0.00251339	0.0474851	0.482551	0.999976	Smoker>E-cig>Never
TC10002476.hg.1	PHYH	0.00551511	0.0823105	0.219257	0.999976	Smoker>E-cig>Never
TC20000341.hg.1	PI3	0.000407863	0.0126961	0.209849	0.999976	Never>E-cig>Smoker
TC15000627.hg.1	PIAS1	0.00115997	0.0277119	0.803579	0.999976	Never>E-cig>Smoker
TC18000833.hg.1	PIEZO2	0.00123636	0.0288792	0.510574	0.999976	Never>E-cig>Smoker
TC18000324.hg.1	PIEZO2	0.00156706	0.0341268	0.398987	0.999976	Never>E-cig>Smoker
TC04000009.hg.1	PIGG	0.00679976	0.0947778	0.875684	0.999976	E-cig>Never>Smoker
TC21000960.hg.1	PIGP	1.93804e-05	0.00119325	0.398415	0.999976	Smoker>E-cig>Never
TC21000439.hg.1	PIGP	3.76699e-05	0.00205157	0.573985	0.999976	Smoker>E-cig>Never
TC12000216.hg.1	PIK3C2G	0.000139467	0.00560783	0.357308	0.999976	Never>E-cig>Smoker
TC05000291.hg.1	PIK3R1	0.00141884	0.0318303	0.989234	0.999976	Never>E-cig>Smoker
TC01002616.hg.1	PIK3R3	0.000690346	0.0187378	0.186907	0.999976	Smoker>E-cig>Never
TC06000541.hg.1	PIM1	0.00234571	0.0452837	0.671783	0.999976	Smoker>E-cig>Never
TC19000165.hg.1	PIN1	0.000263751	0.00916398	0.372421	0.999976	Smoker>E-cig>Never
TC19001974.hg.1	PIN1	0.000843278	0.0218295	0.572704	0.999976	Smoker>E-cig>Never
TC01000753.hg.1	PIN1P1	0.00383856	0.064156	0.67604	0.999976	Smoker>E-cig>Never
TC09000316.hg.1	PIP5K1B	1.38668e-06	0.00014698	0.238359	0.999976	Never>E-cig>Smoker
TC0X002327.hg.1	PIR	3.6887e-15	8.23663e-12	0.275853	0.999976	Smoker>E-cig>Never
TC0X001995.hg.1	PIR-FIGF	9.55552e-15	1.68449e-11	0.461131	0.999976	Smoker>E-cig>Never
TC04000480.hg.1	PKD2	0.00164481	0.0353376	0.564517	0.999976	Never>E-cig>Smoker
TC06000948.hg.1	PKIB	2.54488e-05	0.001514	0.487036	0.999976	Never>E-cig>Smoker
TC15002610.hg.1	PKM	0.006036	0.0877854	0.227736	0.999976	Smoker>E-cig>Never
TC01001607.hg.1	PLA2G4A	3.47131e-05	0.00191861	0.733595	0.999976	Smoker>E-cig>Never
TC21000469.hg.1	PLAC4	8.78305e-05	0.00395935	0.387699	0.999976	Smoker>E-cig>Never
TC04001344.hg.1	PLAC8	0.0016825	0.035917	0.622177	0.999976	Never>E-cig>Smoker
TC08001231.hg.1	PLAG1	6.71311e-06	0.00051102	0.513975	0.999976	Never>E-cig>Smoker
TC08002335.hg.1	PLAG1	3.8105e-05	0.0020719	0.868723	0.999976	Never>E-cig>Smoker
TC03001926.hg.1	PLCH1	0.00305953	0.0545375	0.66619	0.999976	Never>E-cig>Smoker
TC03003170.hg.1	PLCH1	0.0059423	0.0867617	0.615342	0.999976	Never>E-cig>Smoker
TC03000104.hg.1	PLCL2	0.00376074	0.0633931	0.536077	0.999976	Never>E-cig>Smoker
TC08000296.hg.1	PLEKHA2	0.00161564	0.0349124	0.321926	0.999976	Never>E-cig>Smoker
TC07000191.hg.1	PLEKHA8	0.00271656	0.0506187	0.172503	0.999976	Smoker>E-cig>Never
TC12001419.hg.1	PLEKHA8P1	0.00370974	0.0626596	0.140026	0.999976	Smoker>E-cig>Never
TC06001094.hg.1	PLEKHG1	0.0021912	0.0430549	0.188183	0.999976	Smoker>E-cig>Never
TC05000002.hg.1	PLEKHG4B	0.00423309	0.0686269	0.366181	0.999976	Never>E-cig>Smoker
TC14000407.hg.1	PLEKHH1	1.58823e-06	0.000163179	0.815493	0.999976	Never>E-cig>Smoker
TC10000826.hg.1	PLEKHS1	0.00191843	0.0393009	0.866593	0.999976	Never>E-cig>Smoker
TC16000258.hg.1	PLK1	0.00425931	0.0689186	0.637979	0.999976	Smoker>E-cig>Never
TC05001385.hg.1	PLK2	2.515e-07	3.74388e-05	0.217837	0.999976	Never>E-cig>Smoker
TC01002701.hg.1	PLPP3	1.96259e-07	3.02926e-05	0.708262	0.999976	Never>E-cig>Smoker
TC08001144.hg.1	PLPP5	7.0198e-07	8.67606e-05	0.640682	0.999976	Smoker>E-cig>Never
TC09000030.hg.1	PLPP6	0.000272919	0.00941417	0.137877	0.999976	Smoker>E-cig>Never
TC03001867.hg.1	PLSCR4	0.00434516	0.0700033	0.966435	0.999976	Never>E-cig>Smoker
TC03002520.hg.1	PLXNA1	0.00685247	0.0953538	0.75201	0.999976	Never>E-cig>Smoker
TC18000213.hg.1	PMAIP1	3.06216e-05	0.00174726	0.967046	0.999976	Smoker>E-cig>Never
TC18000741.hg.1	PMAIP1	0.000415243	0.0128894	0.516112	0.999976	Smoker>E-cig>Never
TC06000795.hg.1	PNRC1	3.63898e-05	0.00200138	0.541488	0.999976	Never>E-cig>Smoker
TC01003227.hg.1	POGZ	2.42066e-05	0.00145041	0.572108	0.999976	Never>E-cig>Smoker
TC11000622.hg.1	POLA2	1.57004e-08	3.44136e-06	0.556149	0.999976	Never>E-cig>Smoker
TC22000849.hg.1	POLDIP3	0.0030322	0.0541824	0.969226	0.999976	Never>E-cig>Smoker
TC09002753.hg.1	POLE3	0.000264382	0.00917637	0.511085	0.999976	Smoker>E-cig>Never
TC02000470.hg.1	POLE4	0.00267201	0.0499422	0.925767	0.999976	Never>E-cig>Smoker
TC05000441.hg.1	POLR3G	5.47543e-06	0.000447302	0.362317	0.999976	Smoker>E-cig>Never
TC14001342.hg.1	POMT2	0.00251786	0.0475315	0.0110648	0.999976	Smoker>E-cig>Never
TC15001035.hg.1	POTEB3	0.00010956	0.0046603	0.377543	0.999976	Never>E-cig>Smoker
TC15001021.hg.1	POTEB3	0.000113152	0.0047672	0.391113	0.999976	Never>E-cig>Smoker
TC18000393.hg.1	POTEC	0.000365052	0.011667	0.144477	0.999976	Never>E-cig>Smoker
TCUn_gl000213000006.hg.1	POTED	0.000801908	0.021066	0.63319	0.999976	Never>E-cig>Smoker
TC21000016.hg.1	POTED	0.00301939	0.0541098	0.505244	0.999976	Never>E-cig>Smoker
TC02000830.hg.1	POTEE	2.45196e-06	0.000231995	0.945972	0.999976	Never>E-cig>Smoker
TC02002317.hg.1	POTEF	2.29473e-06	0.000222058	0.777376	0.999976	Never>E-cig>Smoker
TC14000010.hg.1	POTEG	5.74041e-06	0.000462186	0.472124	0.999976	Never>E-cig>Smoker
TC14001571.hg.1	POTEG	0.000177445	0.00691891	0.870668	0.999976	Never>E-cig>Smoker
TC22000456.hg.1	POTEH	6.37668e-05	0.00310889	0.803566	0.999976	Never>E-cig>Smoker
TC02002339.hg.1	POTEI	1.08756e-06	0.000120983	0.863716	0.999976	Never>E-cig>Smoker
TC02000816.hg.1	POTEJ	9.80205e-07	0.000112051	0.899982	0.999976	Never>E-cig>Smoker
TC02000856.hg.1	POTEKP	1.5813e-05	0.00100884	0.470169	0.999976	Never>E-cig>Smoker
TC02003586.hg.1	POTEKP	0.000543434	0.0157319	0.265134	0.999976	Never>E-cig>Smoker
TC14000868.hg.1	POTEM	1.82686e-05	0.00113523	0.927297	0.999976	Never>E-cig>Smoker
TC11002279.hg.1	POU2AF1	8.53969e-09	2.01428e-06	0.0245085	0.999976	Never>E-cig>Smoker
TC02002937.hg.1	PP14571	0.00301217	0.0540094	0.900457	0.999976	Smoker>E-cig>Never
TC02004896.hg.1	PP14571	0.00355512	0.060475	0.802318	0.999976	Smoker>E-cig>Never
TC01006320.hg.1	PPCS	0.00455236	0.0723758	0.518399	0.999976	Smoker>E-cig>Never
TC11000150.hg.1	PPFIBP2	0.00423925	0.0686603	0.662296	0.999976	Never>E-cig>Smoker
TC02001685.hg.1	PPM1G	0.000669997	0.0183491	0.0689397	0.999976	Smoker>E-cig>Never
TC6_ssto_hap7000023.hg.1	PPP1R11	8.043e-05	0.00370669	0.296948	0.999976	Smoker>E-cig>Never
TC6_mann_hap4000025.hg.1	PPP1R11	0.000183804	0.00708438	0.254638	0.999976	Smoker>E-cig>Never
TC06000331.hg.1	PPP1R11	0.000351576	0.0114327	0.426234	0.999976	Smoker>E-cig>Never
TC6_apd_hap1000022.hg.1	PPP1R11	0.000605888	0.0169821	0.38881	0.999976	Smoker>E-cig>Never
TC6_cox_hap2000030.hg.1	PPP1R11	0.000605888	0.0169821	0.38881	0.999976	Smoker>E-cig>Never
TC6_dbb_hap3000023.hg.1	PPP1R11	0.000605888	0.0169821	0.38881	0.999976	Smoker>E-cig>Never
TC6_mcf_hap5000019.hg.1	PPP1R11	0.000605888	0.0169821	0.38881	0.999976	Smoker>E-cig>Never
TC6_qbl_hap6000023.hg.1	PPP1R11	0.00143947	0.0320264	0.504772	0.999976	Smoker>E-cig>Never
TC11001902.hg.1	PPP1R14B	0.00385023	0.0642549	0.613813	0.999976	Smoker>E-cig>Never
TC20000291.hg.1	PPP1R16B	1.75855e-09	5.60959e-07	0.864224	0.999976	Never>E-cig>Smoker
TC07000565.hg.1	PPP1R9A	8.03557e-06	0.000576324	0.307151	0.999976	Never>E-cig>Smoker
TC07002464.hg.1	PPP1R9A	0.0028256	0.0518242	0.138167	0.999976	Never>E-cig>Smoker
TC06000591.hg.1	PPP2R5D	6.33176e-06	0.000492056	0.46213	0.999976	Smoker>E-cig>Never
TC10000464.hg.1	PPP3CB-AS1	0.00325841	0.0570801	0.718365	0.999976	Never>E-cig>Smoker
TC19001864.hg.1	PPP6R1	0.00153327	0.0335655	0.648125	0.999976	Smoker>E-cig>Never
TC15001858.hg.1	PRC1	0.000712542	0.0192175	0.326571	0.999976	Smoker>E-cig>Never
TC11002650.hg.1	PRDM11	1.70214e-05	0.00107165	0.186798	0.999976	Never>E-cig>Smoker
TC11000377.hg.1	PRDM11	6.55723e-05	0.00316467	0.982434	0.999976	Never>E-cig>Smoker
TC01002611.hg.1	PRDX1	8.04123e-11	3.84761e-08	0.196303	0.999976	Smoker>E-cig>Never
TC0X000110.hg.1	PRDX4	1.40745e-05	0.000927976	0.843861	0.999976	Smoker>E-cig>Never
TC02001675.hg.1	PREB	0.00718409	0.0986163	0.648272	0.999976	Smoker>E-cig>Never
TC05001896.hg.1	PRELID2	0.00669622	0.0939997	0.23957	0.999976	Smoker>Never>E-cig
TC20000920.hg.1	PREX1	0.00540685	0.0812094	0.00640539	0.999976	Never>E-cig>Smoker
TC12000936.hg.1	PRKAB1	0.000510446	0.0150899	0.00693242	0.999976	Smoker>Never>E-cig
TC01003124.hg.1	PRKAB2	0.00519755	0.0789509	0.257689	0.999976	Never>E-cig>Smoker
TC07000688.hg.1	PRKAR2B	7.23873e-07	8.8811e-05	0.182093	0.999976	Never>E-cig>Smoker
TC17000783.hg.1	PRKCA	0.00137777	0.0311448	0.45291	0.999976	Never>E-cig>Smoker
TC02000280.hg.1	PRKCE	0.00387099	0.0644409	0.937781	0.999976	Never>E-cig>Smoker
TC0X000809.hg.1	PRKX	1.08268e-06	0.000120983	0.99485	0.999976	Smoker>E-cig>Never
TC01000406.hg.1	PRO0611	0.00491581	0.0762622	0.852356	0.999976	Smoker>E-cig>Never
TC02000571.hg.1	PROM2	0.00659368	0.0929639	0.951414	0.999976	Smoker>E-cig>Never
TC03001590.hg.1	PROS1	7.60875e-06	0.000558175	0.989153	0.999976	Never>E-cig>Smoker
TC17001897.hg.1	PRPSAP1	0.00725267	0.0993135	0.07141	0.999976	Smoker>E-cig>Never
TC07000184.hg.1	PRR15	0.0029223	0.052965	0.863304	0.999976	Smoker>E-cig>Never
TC17001632.hg.1	PRR15L	0.00156046	0.0340052	0.876001	0.999976	Never>E-cig>Smoker
TC04001494.hg.1	PRSS12	3.85099e-06	0.000337657	0.392456	0.999976	Never>E-cig>Smoker
TC08001016.hg.1	PSD3	0.000222565	0.00813822	0.952724	0.999976	Smoker>E-cig>Never
TC19001582.hg.1	PSG5	0.00408141	0.0668951	0.355674	0.999976	Smoker>E-cig>Never
TC19001579.hg.1	PSG7	0.00693667	0.0961834	0.630561	0.999976	Smoker>E-cig>Never
TC14000346.hg.1	PSMA3	0.00479589	0.0749923	0.632014	0.999976	Smoker>E-cig>Never
TC14001708.hg.1	PSMA3	0.00657245	0.0927676	0.907611	0.999976	Smoker>E-cig>Never
TC12003259.hg.1	PSMD9	0.000834982	0.0217303	0.879827	0.999976	Smoker>E-cig>Never
TC21000458.hg.1	PSMG1	0.000363577	0.0116644	0.837888	0.999976	Smoker>E-cig>Never
TC10000895.hg.1	PSTK	0.00205857	0.041164	0.817295	0.999976	Smoker>E-cig>Never
TC01002421.hg.1	PTAFR	0.00251891	0.0475315	0.273337	0.999976	Smoker>E-cig>Never
TC01005362.hg.1	PTAFR	0.00358746	0.0608704	0.340654	0.999976	Smoker>E-cig>Never
TC14000306.hg.1	PTGER2	0.00349537	0.059762	0.210567	0.999976	E-cig>Never>Smoker
TC05000184.hg.1	PTGER4	1.60112e-06	0.000164	0.886862	0.999976	Never>E-cig>Smoker
TC12001612.hg.1	PTGES3	0.0072886	0.0996426	0.493347	0.999976	Smoker>E-cig>Never
TC12001341.hg.1	PTHLH	0.000522815	0.0153472	0.775811	0.999976	Smoker>E-cig>Never
TC08000207.hg.1	PTK2B	0.00155578	0.0339474	0.183255	0.999976	Never>E-cig>Smoker
TC20001033.hg.1	PTK6	5.99742e-06	0.000474888	0.769322	0.999976	Smoker>E-cig>Never
TC09000455.hg.1	PTPDC1	0.00705727	0.0973944	0.578076	0.999976	E-cig>Never>Smoker
TC09002738.hg.1	PTPN3	8.04159e-10	2.99272e-07	0.392266	0.999976	Never>E-cig>Smoker
TC09001468.hg.1	PTPN3	3.58141e-09	1.00803e-06	0.380693	0.999976	Never>E-cig>Smoker
TC10000922.hg.1	PTPRE	0.00393245	0.0651128	0.453421	0.999976	Never>E-cig>Smoker
TC19001862.hg.1	PTPRH	0.000187133	0.00718787	0.551522	0.999976	Smoker>E-cig>Never
TC18000035.hg.1	PTPRM	7.55594e-10	2.84358e-07	0.384848	0.999976	Never>E-cig>Smoker
TC07002077.hg.1	PTPRN2	8.41033e-05	0.00383259	0.427228	0.999976	Smoker>E-cig>Never
TC11001009.hg.1	PTS	0.00158194	0.0343616	0.629603	0.999976	Smoker>E-cig>Never
TC02001621.hg.1	PUM2	0.00584882	0.0857707	0.963341	0.999976	Never>E-cig>Smoker
TC03000561.hg.1	PVRL3	7.69904e-08	1.34308e-05	0.0774395	0.999976	Never>E-cig>Smoker
TC08000750.hg.1	PVT1	3.91778e-11	2.11648e-08	0.698325	0.999976	Smoker>E-cig>Never
TC08002099.hg.1	PVT1	5.60479e-11	2.93323e-08	0.648127	0.999976	Smoker>E-cig>Never
TC15002091.hg.1	PWAR5	0.00488897	0.0759866	0.849139	0.999976	Never>E-cig>Smoker
TC17001966.hg.1	PYCR1	0.000258858	0.00902204	0.949015	0.999976	Smoker>E-cig>Never
TC01006386.hg.1	PYCR2	0.00325733	0.0570801	0.986711	0.999976	Smoker>E-cig>Never
TC20000168.hg.1	PYGB	0.00129014	0.029636	0.656879	0.999976	Smoker>E-cig>Never
TC15001468.hg.1	PYGO1	6.03911e-05	0.00297462	0.92785	0.999976	Never>E-cig>Smoker
TC15002548.hg.1	PYGO1	0.000916318	0.0233586	0.30155	0.999976	E-cig>Never>Smoker
TC12001588.hg.1	PYM1	0.0048591	0.0756277	0.7362	0.999976	Smoker>E-cig>Never
TC14001224.hg.1	RAB15	0.00333766	0.0579681	0.566449	0.999976	Smoker>E-cig>Never
TC01001311.hg.1	RAB25	0.00405592	0.0666581	0.744748	0.999976	Smoker>E-cig>Never
TC18000189.hg.1	RAB27B	0.00362147	0.0612923	0.760882	0.999976	Smoker>E-cig>Never
TC19001181.hg.1	RAB3D	0.00495938	0.076707	0.922912	0.999976	Smoker>E-cig>Never
TC11002069.hg.1	RAB6A	0.00231522	0.0448242	0.959013	0.999976	Smoker>E-cig>Never
TC03001798.hg.1	RAB6B	2.35684e-06	0.000225543	0.962247	0.999976	Never>E-cig>Smoker
TC14001742.hg.1	RAD51B	3.76634e-05	0.00205157	0.323657	0.999976	Never>E-cig>Smoker
TC14000411.hg.1	RAD51B	0.00644468	0.0918546	0.822289	0.999976	Never>E-cig>Smoker
TC02000760.hg.1	RALB	0.00485784	0.0756277	0.410052	0.999976	Smoker>E-cig>Never
TC17002643.hg.1	RAMP2-AS1	0.00054229	0.0157123	0.753516	0.999976	Never>E-cig>Smoker
TC17001543.hg.1	RAMP2-AS1	0.000544702	0.015755	0.597398	0.999976	Never>E-cig>Smoker
TC01002326.hg.1	RAP1GAP	0.000513443	0.0151384	0.392168	0.999976	Smoker>E-cig>Never
TC13000341.hg.1	RAP2A	0.00470814	0.0740698	0.432993	0.999976	Smoker>E-cig>Never
TC03001949.hg.1	RARRES1	0.00284524	0.0519933	0.481673	0.999976	Never>E-cig>Smoker
TC04002922.hg.1	RASGEF1B	0.00421814	0.0685504	0.75441	0.999976	Never>E-cig>Smoker
TC12002292.hg.1	RASSF8	0.000399728	0.0124776	0.441782	0.999976	Never>E-cig>Smoker
TC12000255.hg.1	RASSF8	0.000580356	0.0164315	0.248016	0.999976	Never>E-cig>Smoker
TC12001786.hg.1	RASSF9	0.00220065	0.0431549	0.917843	0.999976	Never>E-cig>Smoker
TC14000939.hg.1	RBM23	0.0018364	0.0380962	0.902663	0.999976	Never>E-cig>Smoker
TC06000113.hg.1	RBM24	9.91671e-05	0.00436384	0.572743	0.999976	Smoker>E-cig>Never
TC03002333.hg.1	RBM5	0.00239319	0.0459274	0.175736	0.999976	Never>E-cig>Smoker
TC03003352.hg.1	RBM5	0.00662028	0.093222	0.346624	0.999976	Never>E-cig>Smoker
TC12000514.hg.1	RBMS2	0.000286869	0.00978451	0.31725	0.999976	Never>E-cig>Smoker
TC03000146.hg.1	RBMS3	0.000105416	0.00453831	0.749915	0.999976	Never>E-cig>Smoker
TC03003114.hg.1	RBP1	0.00114984	0.0275878	0.434064	0.999976	Smoker>Never>E-cig
TC08000240.hg.1	RBPMS	1.40005e-05	0.000924917	0.0264076	0.999976	Never>E-cig>Smoker
TC08001864.hg.1	RBPMS	0.000366185	0.0116921	0.0115867	0.999976	Never>E-cig>Smoker
TC03001203.hg.1	RBSN	0.00184686	0.038208	0.300587	0.999976	E-cig>Never>Smoker
TC13000656.hg.1	RCBTB2	2.33162e-05	0.00140459	0.0718194	0.999976	Never>E-cig>Smoker
TC08000482.hg.1	RDH10	7.44082e-07	9.06265e-05	0.755772	0.999976	Smoker>E-cig>Never
TC02002055.hg.1	REEP1	9.01618e-07	0.00010559	0.849761	0.999976	Smoker>Never>E-cig
TC0X000082.hg.1	REPS2	5.25971e-05	0.0026896	0.651692	0.999976	Never>E-cig>Smoker
TC0X001610.hg.1	REPS2	0.00604343	0.0878553	0.939986	0.999976	Never>E-cig>Smoker
TC01002171.hg.1	RERE	0.000201833	0.0076242	0.913776	0.999976	Never>E-cig>Smoker
TC10002029.hg.1	RET	0.00173083	0.0366218	0.88468	0.999976	Smoker>E-cig>Never
TC02002037.hg.1	RETSAT	0.00332587	0.0579286	0.249186	0.999976	Smoker>E-cig>Never
TC11003434.hg.1	REXO2	0.00323861	0.0568785	0.0334188	0.999976	Smoker>E-cig>Never
TC17002896.hg.1	RFFL	0.000535117	0.0155714	0.922739	0.999976	Smoker>E-cig>Never
TC03001216.hg.1	RFTN1	3.97077e-06	0.000346346	0.995609	0.999976	Never>E-cig>Smoker
TC13000147.hg.1	RGCC	2.61387e-05	0.00154136	0.233251	0.999976	Smoker>E-cig>Never
TC09002192.hg.1	RGS3	0.00138646	0.0312908	0.414523	0.999976	Smoker>E-cig>Never
TC12003229.hg.1	RHNO1	0.000775608	0.0205361	0.560389	0.999976	Smoker>E-cig>Never
TC10002665.hg.1	RHOBTB1	0.00199536	0.0403578	0.764786	0.999976	E-cig>Never>Smoker
TC10001320.hg.1	RHOBTB1	0.00300243	0.0539309	0.856086	0.999976	E-cig>Never>Smoker
TC05000461.hg.1	RHOBTB3	0.00066934	0.018346	0.45448	0.999976	Never>E-cig>Smoker
TC01006343.hg.1	RHOU	0.00122727	0.028866	0.00583538	0.999976	E-cig>Never>Smoker
TC15001245.hg.1	RHOV	0.00282807	0.0518242	0.397767	0.999976	Never>E-cig>Smoker
TC01000526.hg.1	RIMKLA	2.00789e-06	0.000198385	0.230123	0.999976	Smoker>E-cig>Never
TC06000726.hg.1	RIMS1	0.00283443	0.0518494	0.345321	0.999976	E-cig>Never>Smoker
TC20001131.hg.1	RIN2	0.00361643	0.061238	0.913927	0.999976	Never>E-cig>Smoker
TC01003324.hg.1	RIT1	1.34731e-06	0.000143259	0.718072	0.999976	Smoker>E-cig>Never
TC02002419.hg.1	RND3	0.00300457	0.0539309	0.301028	0.999976	Smoker>E-cig>Never
TC12000947.hg.1	RNF10	3.12013e-05	0.00177128	0.439472	0.999976	Smoker>E-cig>Never
TC05002142.hg.1	RNF130	0.000134301	0.00543272	0.61503	0.999976	Never>E-cig>Smoker
TC04001595.hg.1	RNF150	0.00207665	0.0414462	0.00643237	0.999976	Never>E-cig>Smoker
TC04001656.hg.1	RNF175	3.21204e-07	4.57805e-05	0.51726	0.999976	Smoker>E-cig>Never
TC05000270.hg.1	RNF180	0.00548325	0.0820625	0.98651	0.999976	Never>E-cig>Smoker
TC02000514.hg.1	RNF181	0.00144173	0.0320264	0.435408	0.999976	Smoker>E-cig>Never
TC09001499.hg.1	RNF183	5.21332e-05	0.00266996	0.0976379	0.999976	Smoker>E-cig>Never
TC17000918.hg.1	RNF213	0.00501737	0.0771588	0.997205	0.999976	E-cig>Smoker>Never
TC07003317.hg.1	RNF216P1	0.00214366	0.0423099	0.514009	0.999976	Never>E-cig>Smoker
TC07002119.hg.1	RNF216P1	0.00217629	0.0428781	0.661915	0.999976	Never>E-cig>Smoker
TC06000956.hg.1	RNF217	0.000113641	0.00477578	0.577109	0.999976	Smoker>E-cig>Never
TC06000544.hg.1	RNF8	0.00133883	0.0305315	0.21589	0.999976	Smoker>E-cig>Never
TC12000918.hg.1	RNFT2	6.69673e-10	2.57816e-07	0.538797	0.999976	Smoker>E-cig>Never
TC01000917.hg.1	RNPC3	5.78264e-05	0.00287422	0.943796	0.999976	Never>E-cig>Smoker
TC03000650.hg.1	ROPN1B	0.00249328	0.0472341	0.467175	0.999976	Never>E-cig>Smoker
TC0X000415.hg.1	RP11-212D3.3	0.00122034	0.028744	0.884896	0.999976	Never>E-cig>Smoker
TC05001035.hg.1	RP11-281O15.3	0.000516534	0.0152162	0.531866	0.999976	Never>E-cig>Smoker
TC01001157.hg.1	RP11-403I13.4	0.00665722	0.0935699	0.0337748	0.999976	E-cig>Never>Smoker
TC0X000603.hg.1	RP5-931E15.2	0.00103025	0.0255068	0.00260473	0.752095	Never>E-cig>Smoker
TC02004516.hg.1	RPL23AP7	0.000711288	0.0192175	0.601738	0.999976	Smoker>E-cig>Never
TC02002227.hg.1	RPL23AP7	0.00152806	0.0334953	0.211467	0.999976	Smoker>E-cig>Never
TC15001653.hg.1	RPP25	0.000382536	0.012076	0.619027	0.999976	Smoker>E-cig>Never
TC06004057.hg.1	RPS6KA2	0.000501644	0.0149087	0.0988376	0.999976	Smoker>E-cig>Never
TC19002061.hg.1	RPSAP58	0.0049628	0.076707	0.653942	0.999976	Never>E-cig>Smoker
TC16001177.hg.1	RRAD	0.00461735	0.0730876	0.74308	0.999976	Never>E-cig>Smoker
TC06001941.hg.1	RRAGD	0.00608156	0.0880399	0.948716	0.999976	Smoker>E-cig>Never
TC20000657.hg.1	RRBP1	9.47821e-06	0.000665541	0.740284	0.999976	Smoker>E-cig>Never
TC20001446.hg.1	RRBP1	0.000960344	0.0241485	0.133497	0.999976	Smoker>E-cig>Never
TC10001563.hg.1	RRP12	3.81036e-06	0.000334972	0.487609	0.999976	Smoker>E-cig>Never
TC06000593.hg.1	RRP36	0.00229097	0.0445609	0.207581	0.999976	Smoker>E-cig>Never
TC01003005.hg.1	RSBN1	0.00388014	0.0645289	0.862347	0.999976	Never>E-cig>Smoker
TC01000193.hg.1	RSC1A1	0.00108465	0.0264112	0.140323	0.999976	E-cig>Never>Smoker
TC17000985.hg.1	RTN4RL1	2.7009e-05	0.00158154	0.504623	0.999976	Never>E-cig>Smoker
TC18000567.hg.1	RTTN	0.00012199	0.0050506	0.369468	0.999976	Never>E-cig>Smoker
TC08001413.hg.1	RUNX1T1	0.000188582	0.00722697	0.00302374	0.816752	Never>E-cig>Smoker
TC01003239.hg.1	S100A10	1.12546e-09	3.92704e-07	0.70632	0.999976	Smoker>E-cig>Never
TC01005824.hg.1	S100A10	1.31024e-08	2.94532e-06	0.830456	0.999976	Smoker>E-cig>Never
TC01003270.hg.1	S100A14	3.32754e-07	4.68289e-05	0.542655	0.999976	Smoker>E-cig>Never
TC04000072.hg.1	S100P	3.28499e-07	4.64333e-05	0.77002	0.999976	Smoker>E-cig>Never
TC04001883.hg.1	S100P	0.00559267	0.0830692	0.479516	0.999976	E-cig>Smoker>Never
TC11002587.hg.1	SAA1	0.00308963	0.0548697	0.240013	0.999976	Never>E-cig>Smoker
TC11003478.hg.1	SAA2	0.00382793	0.0640423	0.17537	0.999976	Never>E-cig>Smoker
TC11003477.hg.1	SAA4	0.0032844	0.0574152	0.249997	0.999976	Never>E-cig>Smoker
TC14000490.hg.1	SAMD15	2.48968e-09	7.44548e-07	0.129795	0.999976	Smoker>E-cig>Never
TC20000821.hg.1	SAMHD1	0.00648556	0.0920812	0.439035	0.999976	Never>E-cig>Smoker
TC05000852.hg.1	SAP30L	0.00416407	0.0678033	0.25953	0.999976	Smoker>E-cig>Never
TC15000688.hg.1	SCAMP5	0.00501504	0.0771583	0.10161	0.999976	Smoker>E-cig>Never
TC15002339.hg.1	SCAND2P	0.00514925	0.078502	0.774211	0.999976	E-cig>Never>Smoker
TC11000910.hg.1	SCARNA9	0.00288149	0.052424	0.835066	0.999976	Never>E-cig>Smoker
TC04001338.hg.1	SCD5	0.00276702	0.0511754	0.517042	0.999976	Never>E-cig>Smoker
TC13000295.hg.1	SCEL	5.12621e-07	6.73322e-05	0.226252	0.999976	Smoker>E-cig>Never
TC11000552.hg.1	SCGB1A1	8.838e-08	1.51031e-05	0.82516	0.999976	Never>E-cig>Smoker
TC11000548.hg.1	SCGB2A1	0.000828279	0.0215726	0.455679	0.999976	Smoker>E-cig>Never
TC05002147.hg.1	SCGB3A1	5.06824e-05	0.00260697	0.74955	0.999976	Never>E-cig>Smoker
TC07000095.hg.1	SCIN	0.00531049	0.0801937	0.702246	0.999976	Smoker>E-cig>Never
TC01002564.hg.1	SCMH1	0.000236369	0.00851283	0.592363	0.999976	Never>E-cig>Smoker
TC0X000087.hg.1	SCML1	0.00297474	0.0535966	0.540926	0.999976	Never>E-cig>Smoker
TC16000253.hg.1	SCNN1G	4.64711e-07	6.25037e-05	0.606211	0.999976	Never>E-cig>Smoker
TC20000544.hg.1	SCRT2	1.3078e-07	2.11611e-05	0.705547	0.999976	Smoker>E-cig>Never
TC02001619.hg.1	SDC1	0.00679268	0.0947778	0.590973	0.999976	Smoker>E-cig>Never
TC20000878.hg.1	SDC4	0.00205411	0.041164	0.880962	0.999976	Never>E-cig>Smoker
TC20001740.hg.1	SDCBP2	1.59028e-09	5.22206e-07	0.953824	0.999976	Smoker>E-cig>Never
TC11003455.hg.1	SDHAF2	1.53999e-05	0.000988128	0.757176	0.999976	Smoker>E-cig>Never
TC07000040.hg.1	SDK1	0.00276003	0.0511441	0.889221	0.999976	Never>E-cig>Smoker
TC02002627.hg.1	SDPR	0.00123434	0.0288792	0.33929	0.999976	Smoker>Never>E-cig
TC18000210.hg.1	SEC11C	0.00297189	0.053574	0.29124	0.999976	Smoker>E-cig>Never
TC03001159.hg.1	SEC13	3.03183e-05	0.00173587	0.629437	0.999976	Smoker>E-cig>Never
TC03002801.hg.1	SEC13	0.00111715	0.026997	0.952449	0.999976	Smoker>E-cig>Never
TC03002802.hg.1	SEC13	0.00134623	0.0306321	0.185773	0.999976	Smoker>E-cig>Never
TC17000884.hg.1	SEC14L1	8.6286e-06	0.000613602	0.74401	0.999976	Never>E-cig>Smoker
TC22000653.hg.1	SEC14L3	3.70186e-08	7.38037e-06	0.447261	0.999976	Never>E-cig>Smoker
TC09001732.hg.1	SEC16A	0.000131594	0.00536857	0.528549	0.999976	Smoker>E-cig>Never
TC04001496.hg.1	SEC24D	1.51272e-05	0.00097378	0.441638	0.999976	Smoker>E-cig>Never
TC01003226.hg.1	SELENBP1	0.000225861	0.00822282	0.313743	0.999976	Never>E-cig>Smoker
TC01003499.hg.1	SELP	0.00653974	0.0926173	0.132014	0.999976	Never>E-cig>Smoker
TC07001570.hg.1	SEMA3D	0.00190151	0.0390763	0.249023	0.999976	Never>E-cig>Smoker
TC07001566.hg.1	SEMA3E	0.00378312	0.0634829	0.478684	0.999976	Never>E-cig>Smoker
TC05001151.hg.1	SEMA5A	0.00128505	0.029636	0.861828	0.999976	Never>E-cig>Smoker
TC19001066.hg.1	SEMA6B	0.000571624	0.016253	0.785	0.999976	Smoker>E-cig>Never
TC02002187.hg.1	SEPT10	0.00155133	0.0338724	0.301309	0.999976	Smoker>E-cig>Never
TC17000885.hg.1	SEPT9	0.00207638	0.0414462	0.911496	0.999976	Smoker>E-cig>Never
TC15002177.hg.1	SERF2	2.79665e-07	4.03755e-05	0.828324	0.999976	Smoker>E-cig>Never
TC01000408.hg.1	SERINC2	0.00140557	0.0315537	0.751084	0.999976	Smoker>E-cig>Never
TC11002677.hg.1	SERPING1	0.0054274	0.081445	0.990514	0.999976	Never>E-cig>Smoker
TC01001754.hg.1	SERTAD4	6.22182e-07	7.86391e-05	0.667626	0.999976	Never>E-cig>Smoker
TC01003788.hg.1	SERTAD4-AS1	0.00152278	0.0334251	0.783615	0.999976	Never>E-cig>Smoker
TC06001997.hg.1	SESN1	0.00509277	0.0779603	0.893179	0.999976	Never>E-cig>Smoker
TC11002205.hg.1	SESN3	0.00638142	0.0913025	0.813426	0.999976	Never>E-cig>Smoker
TC18000160.hg.1	SETBP1	8.85428e-07	0.000104058	0.242653	0.999976	Never>E-cig>Smoker
TC18000692.hg.1	SETBP1	3.31949e-05	0.00184997	0.0927983	0.999976	Never>E-cig>Smoker
TC04001583.hg.1	SETD7	5.53496e-05	0.00278844	0.454178	0.999976	Smoker>E-cig>Never
TC01001194.hg.1	SETDB1	0.00222428	0.0434909	0.863339	0.999976	Never>E-cig>Smoker
TC04001657.hg.1	SFRP2	1.7718e-13	2.04637e-10	0.766597	0.999976	Smoker>E-cig>Never
TC12001046.hg.1	SFSWAP	0.00481928	0.0752878	0.444695	0.999976	Never>E-cig>Smoker
TC14002320.hg.1	SFTA3	0.00555692	0.082648	0.79503	0.999976	E-cig>Never>Smoker
TC10000731.hg.1	SFXN3	5.93969e-06	0.000471431	0.837362	0.999976	Never>E-cig>Smoker
TC07001614.hg.1	SGCE	0.000415614	0.0128894	0.0839089	0.999976	Never>E-cig>Smoker
TC06002126.hg.1	SGK1	1.20674e-05	0.000816535	0.43274	0.999976	Never>E-cig>Smoker
TC08002607.hg.1	SGK3	0.00552739	0.082428	0.833175	0.999976	Smoker>E-cig>Never
TC08000146.hg.1	SH2D4A	0.000253157	0.00885099	0.146656	0.999976	Smoker>E-cig>Never
TC0X000433.hg.1	SH3BGRL	2.68706e-05	0.00157895	0.498534	0.999976	Never>E-cig>Smoker
TC04002781.hg.1	SH3D19	5.12211e-08	9.42638e-06	0.497849	0.999976	Smoker>E-cig>Never
TC04001637.hg.1	SH3D19	6.22548e-06	0.000486051	0.551636	0.999976	Smoker>E-cig>Never
TC0X000903.hg.1	SH3KBP1	0.00119632	0.028362	0.182999	0.999976	Never>E-cig>Smoker
TC11002030.hg.1	SHANK2	0.0025943	0.0486799	0.286945	0.999976	Never>E-cig>Smoker
TC15001338.hg.1	SHC4	5.11514e-06	0.000423028	0.829106	0.999976	Never>E-cig>Smoker
TC07003407.hg.1	SHFM1	0.00162363	0.0349906	0.610601	0.999976	Smoker>E-cig>Never
TC17001201.hg.1	SHMT1	0.000273538	0.00942581	0.0288766	0.999976	Never>Smoker>E-cig
TC17002848.hg.1	SHPK	0.00258592	0.0486042	0.842908	0.999976	Smoker>E-cig>Never
TC0X002066.hg.1	SHROOM4	0.00339686	0.0585271	0.751172	0.999976	E-cig>Never>Smoker
TC13000639.hg.1	SIAH3	5.37445e-05	0.00273574	0.166564	0.999976	Never>E-cig>Smoker
TC03000579.hg.1	SIDT1	0.00051263	0.0151278	0.836989	0.999976	Never>E-cig>Smoker
TC11000998.hg.1	SIK2	0.000251339	0.00883352	0.872186	0.999976	Never>E-cig>Smoker
TC05000994.hg.1	SIMC1	0.00211227	0.0418876	0.706235	0.999976	E-cig>Never>Smoker
TC17001637.hg.1	SKAP1	0.000325496	0.0107199	0.100594	0.999976	Never>E-cig>Smoker
TC01001372.hg.1	SLAMF7	2.4236e-07	3.64018e-05	0.812337	0.999976	Never>E-cig>Smoker
TC12001499.hg.1	SLC11A2	0.000353223	0.0114649	0.0612969	0.999976	Never>E-cig>Smoker
TC12002877.hg.1	SLC11A2	0.00155046	0.0338724	0.0935755	0.999976	Never>E-cig>Smoker
TC05001102.hg.1	SLC12A7	0.00631776	0.0907471	0.346904	0.999976	Smoker>E-cig>Never
TC17002142.hg.1	SLC13A2	0.00159867	0.034635	0.320872	0.999976	Never>E-cig>Smoker
TC17000322.hg.1	SLC13A2	0.00310412	0.0550978	0.306452	0.999976	Never>E-cig>Smoker
TC07001888.hg.1	SLC13A4	0.00162282	0.0349906	0.626288	0.999976	Never>E-cig>Smoker
TC01002971.hg.1	SLC16A4	0.001648	0.0353834	0.472789	0.999976	Smoker>E-cig>Never
TC17001820.hg.1	SLC16A6	2.56724e-05	0.00152189	0.366626	0.999976	Never>E-cig>Smoker
TC06001876.hg.1	SLC17A5	4.24471e-05	0.0022567	0.625536	0.999976	Smoker>E-cig>Never
TC01003497.hg.1	SLC19A2	3.07427e-05	0.00175119	0.545825	0.999976	Never>E-cig>Smoker
TC02000711.hg.1	SLC20A1	1.16107e-07	1.9157e-05	0.968688	0.999976	Smoker>E-cig>Never
TC01001014.hg.1	SLC22A15	5.44405e-07	6.98632e-05	0.238263	0.999976	Never>E-cig>Smoker
TC05000633.hg.1	SLC22A4	2.78573e-07	4.03755e-05	0.480682	0.999976	Never>E-cig>Smoker
TC05000635.hg.1	SLC22A5	0.00414001	0.0674772	0.190086	0.999976	Never>E-cig>Smoker
TC05001840.hg.1	SLC23A1	0.000430684	0.0132708	0.269927	0.999976	Never>E-cig>Smoker
TC02002523.hg.1	SLC25A12	0.00406753	0.0667832	0.880623	0.999976	Never>E-cig>Smoker
TC15000391.hg.1	SLC27A2	0.00232088	0.044882	0.6625	0.999976	Never>E-cig>Smoker
TC09002619.hg.1	SLC28A3	3.06609e-08	6.30034e-06	0.0843381	0.999976	Never>E-cig>Smoker
TC09001286.hg.1	SLC28A3	3.38511e-07	4.7242e-05	0.0445546	0.999976	Never>E-cig>Smoker
TC06000614.hg.1	SLC29A1	2.98745e-05	0.00171632	0.469789	0.999976	Never>E-cig>Smoker
TC01002578.hg.1	SLC2A1	6.00168e-09	1.53451e-06	0.813158	0.999976	Smoker>E-cig>Never
TC12001393.hg.1	SLC2A13	0.000384248	0.0120924	0.384029	0.999976	Never>E-cig>Smoker
TC0X001019.hg.1	SLC35A2	0.00112631	0.0271596	0.43006	0.999976	Smoker>E-cig>Never
TC01000896.hg.1	SLC35A3	9.50596e-05	0.00421154	0.183243	0.999976	Smoker>E-cig>Never
TC17001671.hg.1	SLC35B1	0.00269825	0.0503483	0.975	0.999976	Smoker>E-cig>Never
TC02001139.hg.1	SLC39A10	0.0012281	0.028866	0.0706579	0.999976	Never>E-cig>Smoker
TC08000170.hg.1	SLC39A14	0.00176445	0.0371685	0.761306	0.999976	Smoker>E-cig>Never
TC06000412.hg.1	SLC39A7	3.47518e-06	0.000311451	0.722051	0.999976	Smoker>E-cig>Never
TC6_cox_hap2000102.hg.1	SLC39A7	7.69919e-06	0.000558175	0.755624	0.999976	Smoker>E-cig>Never
TC6_dbb_hap3000094.hg.1	SLC39A7	7.69919e-06	0.000558175	0.755624	0.999976	Smoker>E-cig>Never
TC6_mann_hap4000086.hg.1	SLC39A7	7.69919e-06	0.000558175	0.755624	0.999976	Smoker>E-cig>Never
TC6_mcf_hap5000087.hg.1	SLC39A7	7.69919e-06	0.000558175	0.755624	0.999976	Smoker>E-cig>Never
TC6_qbl_hap6000093.hg.1	SLC39A7	7.69919e-06	0.000558175	0.755624	0.999976	Smoker>E-cig>Never
TC11002708.hg.1	SLC3A2	7.14912e-10	2.72105e-07	0.559267	0.999976	Smoker>E-cig>Never
TC11000567.hg.1	SLC3A2	3.86589e-09	1.07904e-06	0.685932	0.999976	Smoker>E-cig>Never
TC01003754.hg.1	SLC41A1	9.05851e-05	0.00405622	0.608807	0.999976	Never>E-cig>Smoker
TC11003482.hg.1	SLC43A3	0.00281286	0.0516523	0.355223	0.999976	Never>E-cig>Smoker
TC19000180.hg.1	SLC44A2	7.77345e-07	9.39942e-05	0.807256	0.999976	Never>E-cig>Smoker
TC08001690.hg.1	SLC45A4	0.00132409	0.030265	0.921088	0.999976	Smoker>E-cig>Never
TC03001094.hg.1	SLC51A	0.000917277	0.023359	0.679872	0.999976	Smoker>E-cig>Never
TC15000599.hg.1	SLC51B	0.00474904	0.0745031	0.887484	0.999976	Smoker>Never>E-cig
TC22001076.hg.1	SLC5A1	0.00409419	0.0670239	0.0214321	0.999976	E-cig>Never>Smoker
TC02000661.hg.1	SLC5A7	0.00230022	0.0446629	0.806605	0.999976	Never>E-cig>Smoker
TC0X000571.hg.1	SLC6A14	0.00500165	0.0770231	0.310356	0.999976	Never>E-cig>Smoker
TC03001165.hg.1	SLC6A1-AS1	0.00346424	0.0594264	0.154577	0.999976	Never>E-cig>Smoker
TC03001351.hg.1	SLC6A20	1.08893e-06	0.000120983	0.102884	0.999976	Never>E-cig>Smoker
TC03000087.hg.1	SLC6A6	0.00494802	0.0765845	0.932053	0.999976	Smoker>E-cig>Never
TC04001570.hg.1	SLC7A11	3.45658e-14	4.82395e-11	0.952014	0.999976	Smoker>E-cig>Never
TC04002224.hg.1	SLC7A11-AS1	2.94393e-05	0.00169423	0.911396	0.999976	Smoker>E-cig>Never
TC04000674.hg.1	SLC7A11-AS1	0.000167056	0.00657504	0.773645	0.999976	Smoker>E-cig>Never
TC08000127.hg.1	SLC7A2	0.000241933	0.00860058	0.981797	0.999976	Never>E-cig>Smoker
TC08001816.hg.1	SLC7A2	0.000586178	0.0165543	0.993552	0.999976	Never>E-cig>Smoker
TC16001335.hg.1	SLC7A5	0.000763313	0.0202908	0.939949	0.999976	Smoker>E-cig>Never
TC14000951.hg.1	SLC7A8	0.00507593	0.0778175	0.178772	0.999976	Smoker>Never>E-cig
TC02000628.hg.1	SLC9A2	1.96437e-06	0.000195236	0.877356	0.999976	Smoker>E-cig>Never
TC02000627.hg.1	SLC9A4	3.31805e-05	0.00184997	0.833159	0.999976	Smoker>E-cig>Never
TC04000158.hg.1	SLIT2	1.11582e-05	0.000768501	0.737701	0.999976	Never>E-cig>Smoker
TC13000769.hg.1	SLITRK6	1.572e-08	3.44136e-06	0.732	0.999976	Never>E-cig>Smoker
TC20000876.hg.1	SLPI	7.87611e-09	1.92556e-06	0.503084	0.999976	Never>E-cig>Smoker
TC18000998.hg.1	SMAD4	0.0021252	0.042094	0.61629	0.999976	Never>E-cig>Smoker
TC06000718.hg.1	SMAP1	0.000933743	0.0236437	0.200945	0.999976	Smoker>E-cig>Never
TC04000180.hg.1	SMIM20	7.02809e-05	0.00332484	0.373892	0.999976	Smoker>E-cig>Never
TC19001267.hg.1	SMIM7	0.00162448	0.0349906	0.445176	0.999976	Never>E-cig>Smoker
TC04001383.hg.1	SNCA	0.000229195	0.00830807	0.12786	0.999976	Smoker>E-cig>Never
TC07000764.hg.1	SND1	0.0061254	0.0884329	0.224853	0.999976	Smoker>E-cig>Never
TC02001474.hg.1	SNED1	0.00109439	0.0265428	0.337561	0.999976	Never>E-cig>Smoker
TC01000157.hg.1	SNORA59B	6.54602e-06	0.000502872	0.803306	0.999976	Smoker>E-cig>Never
TC17000242.hg.1	SNORA59B	6.54602e-06	0.000502872	0.803306	0.999976	Smoker>E-cig>Never
TC15002785.hg.1	SNORD107	0.00556888	0.0827524	0.934604	0.999976	Never>E-cig>Smoker
TC15000045.hg.1	SNORD108	0.000570822	0.016253	0.687193	0.999976	Never>E-cig>Smoker
TC15000117.hg.1	SNORD109A	0.00352229	0.0600384	0.832075	0.999976	Never>E-cig>Smoker
TC15000047.hg.1	SNORD109B	0.00352229	0.0600384	0.832075	0.999976	Never>E-cig>Smoker
TC15000075.hg.1	SNORD115-1	0.000218855	0.00805371	0.308728	0.999976	Never>E-cig>Smoker
TC15000083.hg.1	SNORD115-10	0.000389589	0.0121952	0.335793	0.999976	Never>E-cig>Smoker
TC15000084.hg.1	SNORD115-11	8.70037e-05	0.00393798	0.210936	0.999976	Never>E-cig>Smoker
TC15000086.hg.1	SNORD115-14	0.00218448	0.043014	0.869175	0.999976	Never>E-cig>Smoker
TC15000087.hg.1	SNORD115-15	0.000222942	0.00814308	0.45429	0.999976	Never>E-cig>Smoker
TC15000092.hg.1	SNORD115-15	0.000238662	0.00855341	0.449088	0.999976	Never>E-cig>Smoker
TC15000088.hg.1	SNORD115-16	0.00023338	0.00842332	0.298414	0.999976	Never>E-cig>Smoker
TC15000093.hg.1	SNORD115-21	0.000238772	0.00855341	0.303258	0.999976	Never>E-cig>Smoker
TC15000094.hg.1	SNORD115-22	0.000119644	0.0049781	0.218774	0.999976	Never>E-cig>Smoker
TC15000096.hg.1	SNORD115-25	0.00445508	0.0712956	0.093795	0.999976	Never>E-cig>Smoker
TC15002787.hg.1	SNORD115-26	0.000530201	0.0154827	0.363347	0.999976	Never>E-cig>Smoker
TC15000098.hg.1	SNORD115-28	0.000779788	0.0206305	0.416809	0.999976	Never>E-cig>Smoker
TC15000112.hg.1	SNORD115-29	8.70037e-05	0.00393798	0.210936	0.999976	Never>E-cig>Smoker
TC15000102.hg.1	SNORD115-32	0.00048591	0.0145573	0.982235	0.999976	Never>E-cig>Smoker
TC15000104.hg.1	SNORD115-35	0.00175542	0.037002	0.921814	0.999976	Never>E-cig>Smoker
TC15000107.hg.1	SNORD115-38	0.00113463	0.0273209	0.452649	0.999976	Never>E-cig>Smoker
TC15000108.hg.1	SNORD115-39	0.000798737	0.0209991	0.404863	0.999976	Never>E-cig>Smoker
TC15000078.hg.1	SNORD115-4	0.00587121	0.0859861	0.556958	0.999976	Never>E-cig>Smoker
TC15000109.hg.1	SNORD115-40	0.000280128	0.00957408	0.270358	0.999976	Never>E-cig>Smoker
TC15000110.hg.1	SNORD115-41	0.000191579	0.0073167	0.245817	0.999976	Never>E-cig>Smoker
[truncated: 454 more rows]
