# Supplementary material for: Biomarkers of Exposure and Effect in the Lungs of Smokers, Nonsmokers, and Electronic Cigarette Users
Source: Oxford University Press journal article supplement (doi:10.1158/1055-9965.epi-19-1245), 2019-12-17
Supplement: 10559965epi191245-sup-230294_2_supp_5915195_q1bvt4.xlsx [file 10559965epi191245-sup-230294_2_supp_5915195_q1bvt4.xlsx]

## Sheet: Suppl2_DM
Supplementary Table 3. The full list of differentially methylated CpGs between never-smokers, e-cig users, and smokers
Probeset ID	UCSC_RefGene_Name	UCSC_RefGene_Accession	Direction of Methylation levels	p-value (3 group)	FDR q-value (3 group)	p-value (gender)	FDR q-value (gender)
cg27638168	ALDH3A1;ALDH3A1;ALDH3A1	NM_001135168;NM_001135167;NM_000691	Never>E-cigs>Smokers	1.68574e-10	0.000123956	0.817748	0.998579
cg20408276	CYP1B1	NM_000104	Never>E-cigs>Smokers	1.05215e-09	0.000386834	0.14801	0.998579
cg18736736	ALDH3A1;ALDH3A1;ALDH3A1	NM_000691;NM_001135168;NM_001135167	Never>E-cigs>Smokers	2.5752e-09	0.000577758	0.263394	0.998579
cg14774195			Never>E-cigs>Smokers	3.14291e-09	0.000577758	0.105342	0.998579
cg02162897	CYP1B1	NM_000104	Never>E-cigs>Smokers	5.11971e-09	0.000752921	0.300437	0.998579
cg26785823	LOC115110	NR_026927	Smokers>E-cigs>Never	8.4437e-09	0.0010348	0.682304	0.998579
cg12258471	ALDH3A1;ALDH3A1;ALDH3A1	NM_001135167;NM_000691;NM_001135168	Never>E-cigs>Smokers	1.10084e-08	0.00115638	0.273118	0.998579
cg04093780	ALPK3	NM_020778	Never>E-cigs>Smokers	3.13048e-08	0.00287736	0.932495	0.999281
cg05575921	AHRR	NM_020731	Never>E-cigs>Smokers	3.7639e-08	0.00307518	0.130984	0.998579
cg26656987			Smokers>E-cigs>Never	4.77244e-08	0.00350926	0.107276	0.998579
cg00230120	LOC100292680	NR_028415	Never>E-cigs>Smokers	7.92587e-08	0.00474434	0.292581	0.998579
cg00922520	CLDN10;CLDN10;CLDN10	NM_006984;NM_001160100;NM_182848	Never>E-cigs>Smokers	8.29476e-08	0.00474434	0.0177886	0.978609
cg24851100	OXCT1	NM_000436	Never>E-cigs>Smokers	8.64562e-08	0.00474434	0.714837	0.998579
cg07824155	NAPA;NAPA;NAPA	NR_038457;NR_038456;NM_003827	Never>E-cigs>Smokers	9.62354e-08	0.00474434	0.0341856	0.998579
cg24140751			Smokers>E-cigs>Never	9.67815e-08	0.00474434	0.706987	0.998579
cg04083553	GP9	NM_000174	Never>E-cigs>Smokers	1.1433e-07	0.00525432	0.113585	0.998579
cg21021168	MAML3	NM_018717	Smokers>E-cigs>Never	1.64573e-07	0.00711844	0.800476	0.998579
cg21519887			Smokers>E-cigs>Never	2.1344e-07	0.00871924	0.00100534	0.574393
cg13612875	OSBPL2;OSBPL2;OSBPL2	NM_144498;NM_014835;NM_001278649	Never>E-cigs>Smokers	2.93239e-07	0.0109362	0.329651	0.998579
cg06503573	TNNT3;TNNT3;TNNT3;TNNT3	NM_001042781;NM_006757;NM_001042780;NM_001042782	Never>E-cigs>Smokers	2.97457e-07	0.0109362	0.00262514	0.722962
cg14715518			Never>E-cigs>Smokers	3.51112e-07	0.0118975	0.956943	0.999739
cg03540108			Never>E-cigs>Smokers	3.66538e-07	0.0118975	0.166084	0.998579
cg05703358	ITGA11	NM_001004439	Never>E-cigs>Smokers	3.72141e-07	0.0118975	0.3893	0.998579
cg15939386	RORA-AS1;RORA-AS1;RORA-AS1;RORA-AS1;RORA;RORA;RORA;RORA	NR_120340;NR_120339;NR_120342;NR_120341;NM_134262;NM_134260;NM_002943;NM_134261	Never>E-cigs>Smokers	4.15288e-07	0.0127237	0.114073	0.998579
cg11705747	UGGT1;UGGT1	NM_020120;NR_027671	Never>E-cigs>Smokers	4.5781e-07	0.0134654	0.702498	0.998579
cg23658891	HIVEP3;HIVEP3	NM_001127714;NM_024503	Smokers>E-cigs>Never	4.78461e-07	0.0135316	0.88358	0.998859
cg09536368			Smokers>E-cigs>Never	6.29225e-07	0.0171363	0.126499	0.998579
cg15285786	ABCA4	NM_000350	Smokers>E-cigs>Never	6.89463e-07	0.0175008	0.336422	0.998579
cg18071202	LOC100292680	NR_028415	Never>E-cigs>Smokers	6.90212e-07	0.0175008	0.786597	0.998579
cg09267676			Smokers>E-cigs>Never	7.43911e-07	0.0182337	0.676361	0.998579
cg26246398	DEPDC5;DEPDC5;DEPDC5;DEPDC5;DEPDC5	NR_110988;NM_001242896;NM_001242897;NM_001136029;NM_014662	Smokers>E-cigs>Never	7.7813e-07	0.0183226	0.603278	0.998579
cg06745001	GYS1;GYS1;GYS1	NM_002103;NR_027763;NM_001161587	Never>E-cigs>Smokers	7.97375e-07	0.0183226	0.188338	0.998579
cg10012825	SIGLEC12;SIGLEC12	NM_033329;NM_053003	Never>E-cigs>Smokers	8.68004e-07	0.0193411	0.467426	0.998579
cg09444931	EFCAB14-AS1;EFCAB14-AS1;EFCAB14	NR_038828;NR_038827;NM_014774	Never>E-cigs>Smokers	9.88626e-07	0.021381	0.235206	0.998579
cg27504582	LOC100292680	NR_028415	Never>E-cigs>Smokers	1.0836e-06	0.0227654	0.831925	0.998579
cg05204754	NOL4L	NM_001256798	Smokers>E-cigs>Never	1.15993e-06	0.0235683	0.683119	0.998579
cg03364832	CACNA2D3	NM_018398	Never>E-cigs>Smokers	1.18592e-06	0.0235683	0.570091	0.998579
cg00575672			Never>E-cigs>Smokers	1.22629e-06	0.0237292	0.882206	0.998831
cg03752903	PPP1R16B;PPP1R16B	NM_015568;NM_001172735	Smokers>E-cigs>Never	1.30514e-06	0.0246076	0.170213	0.998579
cg06875621			Smokers>E-cigs>Never	1.38479e-06	0.0254564	0.327903	0.998579
cg20110678	CAP2	NM_006366	Never>E-cigs>Smokers	1.47092e-06	0.0255944	0.0865965	0.998579
cg02206695	STAT3;STAT3;STAT3	NM_003150;NM_139276;NM_213662	Never>E-cigs>Smokers	1.53019e-06	0.0255944	0.419383	0.998579
cg14175260	SCGB1A1	NM_003357	Smokers>E-cigs>Never	1.65443e-06	0.0255944	0.321128	0.998579
cg05960182			Never>E-cigs>Smokers	1.67452e-06	0.0255944	0.906127	0.999159
cg13656878	PAPPA	NM_002581	Smokers>E-cigs>Never	1.70312e-06	0.0255944	0.139056	0.998579
cg04235954	PPP1R16B;PPP1R16B	NM_015568;NM_001172735	Smokers>E-cigs>Never	1.71094e-06	0.0255944	0.996939	0.999939
cg02647181	LINC01506	NR_109769	Smokers>E-cigs>Never	1.71881e-06	0.0255944	0.82839	0.998579
cg22741960			Smokers>E-cigs>Never	1.76844e-06	0.0255944	0.841101	0.998579
cg14454127	AHRR	NM_020731	Never>E-cigs>Smokers	1.77918e-06	0.0255944	0.207059	0.998579
cg02721252			Never>E-cigs>Smokers	1.78117e-06	0.0255944	0.324714	0.998579
cg13117948	PROM1;PROM1	NM_001145847;NM_001145848	Smokers>E-cigs>Never	1.80247e-06	0.0255944	0.577679	0.998579
cg00565882	CYP1B1	NM_000104	Never>E-cigs>Smokers	1.84014e-06	0.0255944	0.317113	0.998579
cg01375106	BPIFA2	NM_080574	Never>E-cigs>Smokers	1.84479e-06	0.0255944	0.662631	0.998579
cg18756557	LOC100292680	NR_028415	Never>E-cigs>Smokers	1.93515e-06	0.0259469	0.555368	0.998579
cg13623137			Never>E-cigs>Smokers	1.98856e-06	0.0259469	0.841701	0.998579
cg00340120	IL34;IL34	NM_152456;NM_001172771	Smokers>E-cigs>Never	2.0028e-06	0.0259469	0.367753	0.998579
cg24375215	CD300A;CD300A	NM_007261;NM_007261	Smokers>E-cigs>Never	2.01134e-06	0.0259469	0.234416	0.998579
cg16009632	TNS4	NM_032865	Never>E-cigs>Smokers	2.07312e-06	0.0262828	0.918916	0.999161
cg21486829			Never>E-cigs>Smokers	2.13357e-06	0.0265907	0.659418	0.998579
cg06690548	SLC7A11	NM_014331	Never>E-cigs>Smokers	2.20515e-06	0.0267706	0.417132	0.998579
cg00874032			Smokers>E-cigs>Never	2.32819e-06	0.0267706	0.390647	0.998579
cg08090164	LYNX1;LYNX1;LYNX1;LYNX1	NM_023946;NM_177476;NM_177457;NM_177477	Smokers>E-cigs>Never	2.34511e-06	0.0267706	0.496993	0.998579
cg11050992	RGS7;RGS7;RGS7;RGS7	NM_001282775;NM_001282773;NM_002924;NM_001282778	Never>E-cigs>Smokers	2.37103e-06	0.0267706	0.186786	0.998579
cg00332865			Never>E-cigs>Smokers	2.37683e-06	0.0267706	0.402401	0.998579
cg00893849	NUMA1;NUMA1;NUMA1	NR_104476;NM_006185;NM_001286561	Smokers>E-cigs>Never	2.46967e-06	0.0267706	0.165031	0.998579
cg13447009	TTC28	NM_001145418	Smokers>E-cigs>Never	2.47578e-06	0.0267706	0.873642	0.998772
cg03037067			Smokers>E-cigs>Never	2.51567e-06	0.0267706	0.940631	0.999361
cg10880599	GPX2	NM_002083	Never>E-cigs>Smokers	2.52692e-06	0.0267706	0.214435	0.998579
cg20385913			Never>E-cigs>Smokers	2.53412e-06	0.0267706	0.0294178	0.998579
cg02607032	SH3RF1	NM_020870	Never>E-cigs>Smokers	2.54848e-06	0.0267706	0.40841	0.998579
cg19817104	ZBTB41	NM_194314	Never>E-cigs>Smokers	2.62112e-06	0.0268133	0.570796	0.998579
cg24951335	LOC100292680	NR_028415	Never>E-cigs>Smokers	2.62548e-06	0.0268133	0.800416	0.998579
cg17357577	LDLRAD4	NM_181482	Smokers>E-cigs>Never	2.71512e-06	0.0272226	0.296209	0.998579
cg22231062	SLC44A3;SLC44A3;SLC44A3;SLC44A3;SLC44A3;SLC44A3;SLC44A3	NM_001301079;NM_152369;NM_001258340;NM_001114106;NM_001258343;NM_001258342;NM_001258341	Smokers>E-cigs>Never	2.7396e-06	0.0272226	0.000549818	0.453995
cg26144569	CYP1B1	NM_000104	Never>E-cigs>Smokers	2.90053e-06	0.0280431	0.385747	0.998579
cg21227325	PCSK5	NM_006200	Smokers>E-cigs>Never	2.90167e-06	0.0280431	0.000559608	0.456004
cg21962562			Smokers>E-cigs>Never	2.98807e-06	0.0280431	0.529323	0.998579
cg14420709			Never>E-cigs>Smokers	3.01274e-06	0.0280431	0.822996	0.998579
cg06572496	LOC100128714	NR_040082	Smokers>E-cigs>Never	3.07638e-06	0.0280431	0.556022	0.998579
cg14594607	SOX7	NM_031439	Smokers>E-cigs>Never	3.10768e-06	0.0280431	0.00801243	0.902214
cg10305789	PPP1R16B	NM_015568	Smokers>E-cigs>Never	3.15208e-06	0.0280431	0.642969	0.998579
cg05082204	ACTN4	NM_004924	Never>E-cigs>Smokers	3.18939e-06	0.0280431	0.315778	0.998579
cg12283916	ZNF793	NM_001013659	Never>E-cigs>Smokers	3.19767e-06	0.0280431	0.0765524	0.998579
cg20494891	MYO1E	NM_004998	Never>E-cigs>Smokers	3.26562e-06	0.0280431	0.57182	0.998579
cg03741118	HS3ST3A1	NM_006042	Smokers>E-cigs>Never	3.27524e-06	0.0280431	0.187838	0.998579
cg01481646	TSPAN14;TSPAN14	NM_001128309;NM_030927	Never>E-cigs>Smokers	3.28432e-06	0.0280431	0.0750676	0.998579
cg12802310	CYP1B1	NM_000104	Never>E-cigs>Smokers	3.31796e-06	0.0280431	0.44048	0.998579
cg17610574			Smokers>E-cigs>Never	3.51833e-06	0.0293987	0.32269	0.998579
cg05655613			Never>E-cigs>Smokers	3.58468e-06	0.0296166	0.581345	0.998579
cg13763247	TTC39C;TTC39C;TTC39C	NM_153211;NM_001292030;NM_001135993	Never>E-cigs>Smokers	3.71554e-06	0.0303567	0.800383	0.998579
cg21841085	BAHCC1;BAHCC1	NM_001291324;NM_001291324	Never>E-cigs>Smokers	3.94743e-06	0.0318969	0.824384	0.998579
cg10180919	UGT1A8;UGT1A10;UGT1A9;UGT1A7;UGT1A6;UGT1A6	NM_019076;NM_019075;NM_021027;NM_019077;NM_205862;NM_001072	Never>E-cigs>Smokers	4.0535e-06	0.0323979	0.254786	0.998579
cg16160417			Never>E-cigs>Smokers	4.13261e-06	0.0324754	0.764084	0.998579
cg01001759			Smokers>E-cigs>Never	4.18617e-06	0.0324754	0.77735	0.998579
cg08625794			Smokers>E-cigs>Never	4.19569e-06	0.0324754	0.536639	0.998579
cg04863300	C1orf127	NM_001170754	Smokers>E-cigs>Never	4.37106e-06	0.0334804	0.145696	0.998579
cg12921720			Never>E-cigs>Smokers	4.47218e-06	0.0339018	0.37061	0.998579
cg07274215			Smokers>E-cigs>Never	4.73055e-06	0.0350446	0.846198	0.998579
cg11523366	GNA12;GNA12;GNA12;GNA12	NM_001282440;NM_001282441;NM_007353;NM_001293092	Never>E-cigs>Smokers	4.76474e-06	0.0350446	0.746988	0.998579
cg16718063			Smokers>E-cigs>Never	4.76591e-06	0.0350446	0.701126	0.998579
cg14674472	ITGA11	NM_001004439	Smokers>E-cigs>Never	4.89667e-06	0.0353238	0.98378	0.999789
cg02104409	TIMP3;SYN3;SYN3;SYN3	NM_000362;NM_003490;NM_001135774;NM_133633	Never>E-cigs>Smokers	4.92356e-06	0.0353238	0.555866	0.998579
cg23598068	BAIAP2L1	NM_018842	Smokers>E-cigs>Never	4.94801e-06	0.0353238	0.438835	0.998579
cg06673374	ATOX1	NM_004045	Never>E-cigs>Smokers	5.09258e-06	0.0357224	0.394884	0.998579
cg19648686	AKR1C2;AKR1C2;AKR1C2	NM_001354;NM_001135241;NM_205845	Never>E-cigs>Smokers	5.148e-06	0.0357224	0.968962	0.999739
cg10097313			Never>E-cigs>Smokers	5.22714e-06	0.0357224	0.945222	0.999446
cg00804934			Never>E-cigs>Smokers	5.30287e-06	0.0357224	0.940663	0.999361
cg16140648	INCENP;INCENP	NM_001040694;NM_020238	Never>E-cigs>Smokers	5.34158e-06	0.0357224	0.955287	0.999722
cg21516305			Never>E-cigs>Smokers	5.36905e-06	0.0357224	0.465078	0.998579
cg02242989			Smokers>E-cigs>Never	5.37438e-06	0.0357224	0.17965	0.998579
cg02449778	TTC39C;TTC39C;TTC39C	NM_001292030;NM_153211;NM_001135993	Never>E-cigs>Smokers	5.39248e-06	0.0357224	0.377716	0.998579
cg19227284	LIN54;LIN54;LIN54;LIN54;LIN54;LIN54;LIN54	NM_001288997;NM_001288996;NM_194282;NM_001115008;NM_001115007;NR_110254;NR_110253	Never>E-cigs>Smokers	5.5468e-06	0.0362275	0.0824651	0.998579
cg11507052			Never>E-cigs>Smokers	5.56728e-06	0.0362275	0.000767732	0.52612
cg22515589	BAHCC1	NM_001080519	Never>E-cigs>Smokers	5.81048e-06	0.0374784	0.649313	0.998579
cg16450654	KCNIP3	NM_013434	Never>E-cigs>Smokers	5.92464e-06	0.0378539	0.238122	0.998579
cg13900763			Smokers>E-cigs>Never	6.08734e-06	0.0378539	0.294433	0.998579
cg24090911	AHRR	NM_020731	Never>E-cigs>Smokers	6.11446e-06	0.0378539	0.917634	0.999159
cg25922517			Smokers>E-cigs>Never	6.11608e-06	0.0378539	0.985559	0.999789
cg09353832	PTPRE;PTPRE	NM_130435;NM_006504	Smokers>E-cigs>Never	6.12608e-06	0.0378539	0.0380852	0.998579
cg09847541			Never>E-cigs>Smokers	6.23629e-06	0.0380034	0.906728	0.999159
cg02031603	TCTE1	NM_182539	Never>E-cigs>Smokers	6.25365e-06	0.0380034	0.147213	0.998579
cg03442269	GALNT14	NM_024572	Smokers>E-cigs>Never	6.42648e-06	0.0385419	0.245669	0.998579
cg18865824	NRF1;NRF1;NRF1;NRF1	NM_001040110;NM_005011;NM_001293163;NM_001293164	E-cigs>Never>Smokers	6.44708e-06	0.0385419	0.921133	0.999194
cg16528895	SULT1C4	NM_006588	Smokers>E-cigs>Never	6.56917e-06	0.038955	0.0168521	0.97432
cg01408486	CXXC5	NM_016463	Smokers>E-cigs>Never	6.98092e-06	0.0404399	0.981269	0.999789
cg17484029			Never>E-cigs>Smokers	6.99989e-06	0.0404399	0.264962	0.998579
cg26235369			Smokers>E-cigs>Never	7.0234e-06	0.0404399	0.512068	0.998579
cg16954066			Never>E-cigs>Smokers	7.03956e-06	0.0404399	0.302811	0.998579
cg23916318	UGT1A6;UGT1A8;UGT1A10;UGT1A9;UGT1A7	NM_205862;NM_019076;NM_019075;NM_021027;NM_019077	Never>E-cigs>Smokers	7.11647e-06	0.0405648	0.289378	0.998579
cg16177732			Smokers>E-cigs>Never	7.2243e-06	0.0408627	8.63891e-05	0.182538
cg13026370	LOC100192426;PTPRM;PTPRM	NR_024419;NM_002845;NM_001105244	Smokers>E-cigs>Never	7.41279e-06	0.040965	0.165287	0.998579
cg02363500			Never>E-cigs>Smokers	7.43348e-06	0.040965	0.597399	0.998579
cg11345505	SLC44A2	NM_001145056	Smokers>E-cigs>Never	7.464e-06	0.040965	0.158839	0.998579
cg22867816	PROM1;PROM1	NM_001145848;NM_001145847	Smokers>E-cigs>Never	7.46522e-06	0.040965	0.233862	0.998579
cg12558121	RNF43;RNF43;RNF43	NM_001305545;NM_017763;NM_001305544	Never>E-cigs>Smokers	7.62428e-06	0.0415279	0.208789	0.998579
cg18527583			E-cigs>Smokers>Never	7.77442e-06	0.0420343	0.0408869	0.998579
cg16387943	NAA20;NAA20;NAA20	NM_181528;NM_016100;NM_181527	Never>E-cigs>Smokers	8.11509e-06	0.0435559	0.392984	0.998579
cg27141801	DDX19B;DDX19B;DDX19B;DDX19B;LOC100506083;DDX19B;DDX19B;DDX19B	NM_001257175;NM_001257172;NM_001014451;NM_007242;NR_039997;NM_001014449;NM_001257174;NM	Never>E-cigs>Smokers	8.49809e-06	0.0452811	0.43707	0.998579
cg19275872	CEP112;CEP112;CEP112;CEP112	NR_126542;NM_001037325;NM_001199165;NM_001302891	Never>E-cigs>Smokers	8.6226e-06	0.045614	0.292863	0.998579
cg01603919	SLC27A1	NM_198580	Smokers>E-cigs>Never	9.35124e-06	0.0487744	0.930341	0.999281
cg02254192			Smokers>E-cigs>Never	9.36415e-06	0.0487744	0.324854	0.998579
cg21438177	MYO3B;MYO3B;MYO3B;MYO3B;MYO3B	NR_045684;NR_045683;NR_045682;NM_138995;NM_001083615	Never>E-cigs>Smokers	9.47918e-06	0.0487744	0.193625	0.998579
cg16200808	GCK;GCK;GCK	NM_033508;NM_033507;NM_000162	Never>E-cigs>Smokers	9.51837e-06	0.0487744	0.754936	0.998579
cg04486961	CCDC12;CCDC12;CCDC12	NR_102269;NM_001277074;NM_144716	Smokers>E-cigs>Never	9.55169e-06	0.0487744	0.451079	0.998579
cg27446600	RGS7;RGS7;RGS7;RGS7	NM_002924;NM_001282778;NM_001282775;NM_001282773	Never>E-cigs>Smokers	9.85276e-06	0.0499648	0.709809	0.998579
cg17064492	SLC44A2	NM_001145056	Smokers>E-cigs>Never	1.00238e-05	0.0504843	0.439785	0.998579
cg24587280			Smokers>Never>E-cigs	1.01453e-05	0.0504916	0.620521	0.998579
cg21715189	CYP1B1	NM_000104	Never>E-cigs>Smokers	1.02017e-05	0.0504916	0.292189	0.998579
cg04101755			Smokers>E-cigs>Never	1.02313e-05	0.0504916	0.0373157	0.998579
cg15124866			Smokers>E-cigs>Never	1.03092e-05	0.0505367	0.0539157	0.998579
cg22488018			Smokers>E-cigs>Never	1.07318e-05	0.0522601	0.399951	0.998579
cg14223579			Never>E-cigs>Smokers	1.10012e-05	0.0528438	0.466693	0.998579
cg00684125			Smokers>E-cigs>Never	1.10663e-05	0.0528438	0.825445	0.998579
cg13060572	TNRC6B;TNRC6B;TNRC6B	NM_001024843;NM_015088;NM_001162501	Never>E-cigs>Smokers	1.10673e-05	0.0528438	0.687513	0.998579
cg09910876			Smokers>E-cigs>Never	1.13734e-05	0.0538962	0.886469	0.99887
cg04135110	AHRR	NM_020731	Smokers>E-cigs>Never	1.15076e-05	0.0538962	0.285635	0.998579
cg13928794	PDIA5;PDIA5	NR_028444;NM_006810	Smokers>E-cigs>Never	1.15672e-05	0.0538962	0.902528	0.999159
cg11576531			Never>E-cigs>Smokers	1.15809e-05	0.0538962	0.978452	0.999788
cg24577031			Smokers>E-cigs>Never	1.18035e-05	0.0542732	0.969352	0.999739
cg18836319			Smokers>E-cigs>Never	1.18587e-05	0.0542732	0.0807258	0.998579
cg10829629	MMRN2;SNCG	NM_024756;NM_003087	Smokers>E-cigs>Never	1.19704e-05	0.0542732	0.55599	0.998579
cg04707332	TBX15	NM_152380	Smokers>E-cigs>Never	1.20108e-05	0.0542732	0.425569	0.998579
cg07824483	MAFG;MAFG	NM_032711;NM_002359	Never>E-cigs>Smokers	1.20435e-05	0.0542732	0.58293	0.998579
cg27512323	SEC14L3;SEC14L3;SEC14L3;SEC14L3	NM_001257382;NM_001257379;NM_001257378;NM_174975	Smokers>E-cigs>Never	1.21323e-05	0.0542732	0.225769	0.998579
cg17542408	ODZ4	NM_001098816	Smokers>E-cigs>Never	1.21785e-05	0.0542732	0.66224	0.998579
cg15617545	SERPING1;SERPING1	NM_001032295;NM_000062	Smokers>E-cigs>Never	1.2362e-05	0.0547591	0.31979	0.998579
cg06208736	ALDH3A1	NM_000691	Never>E-cigs>Smokers	1.27559e-05	0.0560269	0.56798	0.998579
cg04173301			Never>E-cigs>Smokers	1.28006e-05	0.0560269	0.0343853	0.998579
cg00568910			Never>E-cigs>Smokers	1.31564e-05	0.0568306	0.923041	0.999194
cg19866404			Smokers>Never>E-cigs	1.32335e-05	0.0568306	0.0817604	0.998579
cg11923198	SKOR1	NM_001258024	Smokers>E-cigs>Never	1.32801e-05	0.0568306	0.906625	0.999159
cg24234299	ALDH3A2;ALDH3A2	NM_001031806;NM_000382	Never>E-cigs>Smokers	1.36411e-05	0.0568306	0.242418	0.998579
cg16706546	IGF2BP2;IGF2BP2	NM_001007225;NM_006548	Smokers>E-cigs>Never	1.39264e-05	0.0568306	0.0799082	0.998579
cg18973939	FLJ37453	NR_024279	Smokers>E-cigs>Never	1.39683e-05	0.0568306	0.0238199	0.997975
cg17978283	BAIAP2;BAIAP2;BAIAP2;BAIAP2;BAIAP2-AS1	NM_017451;NM_017450;NM_001144888;NM_006340;NR_026857	Smokers>E-cigs>Never	1.40265e-05	0.0568306	0.318956	0.998579
cg12080687	LOC100134259	NR_024452	Smokers>E-cigs>Never	1.40544e-05	0.0568306	0.908466	0.999159
cg03619252	ATXN7L1;ATXN7L1	NM_138495;NM_020725	Never>E-cigs>Smokers	1.41166e-05	0.0568306	0.583911	0.998579
cg25171118	AKR1B10;AKR1B10	NM_020299;NM_020299	Never>E-cigs>Smokers	1.4139e-05	0.0568306	0.375804	0.998579
cg13588946	EXD2	NM_018199	Never>E-cigs>Smokers	1.42114e-05	0.0568306	0.00388767	0.787947
cg01792117	C17orf63;C17orf63	NM_018182;NM_001077498	Smokers>E-cigs>Never	1.42663e-05	0.0568306	0.90012	0.999159
cg15892180	CAMK1G	NM_020439	Smokers>E-cigs>Never	1.43182e-05	0.0568306	0.135159	0.998579
cg17008013	IFT122;IFT122;IFT122;IFT122;IFT122;IFT122;IFT122;IFT122;IFT122;IFT122;IFT122;IFT122;IFT	NM_052985;NM_018262;NM_052989;NM_052990;NM_001280546;NM_001280545;NM_001280541;NM_00128	Smokers>E-cigs>Never	1.43447e-05	0.0568306	0.0254438	0.998579
cg24032265	MIR1204	NR_031609	Never>E-cigs>Smokers	1.43927e-05	0.0568306	0.780129	0.998579
cg07226883	PPP1R12A;PPP1R12A;PPP1R12A;PPP1R12A;PPP1R12A	NM_001143886;NM_001244992;NM_002480;NM_001244990;NM_001143885	Never>E-cigs>Smokers	1.44484e-05	0.0568306	0.551349	0.998579
cg14054279			Never>E-cigs>Smokers	1.44632e-05	0.0568306	0.761652	0.998579
cg07073140	NEURL1B;NEURL1B;NEURL1B	NM_001142651;NM_001308178;NM_001308177	Smokers>E-cigs>Never	1.46275e-05	0.0568306	0.821155	0.998579
cg17423458	LINC00299	NR_034135	Smokers>E-cigs>Never	1.46382e-05	0.0568306	0.999417	0.999939
cg02965553	ITPKA	NM_002220	Smokers>E-cigs>Never	1.46852e-05	0.0568306	0.449616	0.998579
cg18457731	COL22A1	NM_152888	Smokers>E-cigs>Never	1.46984e-05	0.0568306	0.900504	0.999159
cg22952459	C10orf99	NM_207373	Never>E-cigs>Smokers	1.47313e-05	0.0568306	0.339266	0.998579
cg07751277			Smokers>E-cigs>Never	1.47619e-05	0.0568306	0.0908135	0.998579
cg14951292	HMOX2;HMOX2;HMOX2;NMRAL1	NM_001127204;NM_002134;NM_001127206;NM_020677	Smokers>E-cigs>Never	1.5009e-05	0.0574646	0.544259	0.998579
cg05036173	SULT1C4;SULT1C4	NM_006588;NM_006588	Smokers>E-cigs>Never	1.51316e-05	0.0574646	0.0772837	0.998579
cg26251506	DLX6AS	NR_015448	Smokers>E-cigs>Never	1.5161e-05	0.0574646	0.167428	0.998579
cg08587845	NEUROG1;NEUROG1	NM_006161;NM_006161	Smokers>E-cigs>Never	1.52749e-05	0.0575993	0.058418	0.998579
cg21515113			Never>E-cigs>Smokers	1.5441e-05	0.0579289	0.783316	0.998579
cg16012348	BAHCC1	NM_001291324	Never>E-cigs>Smokers	1.55385e-05	0.0579984	0.59418	0.998579
cg20426959			Smokers>E-cigs>Never	1.60284e-05	0.0594407	0.673615	0.998579
cg24752487			Never>E-cigs>Smokers	1.61074e-05	0.0594407	0.608831	0.998579
cg21542303	NFKB1;NFKB1	NM_003998;NM_001165412	Smokers>E-cigs>Never	1.61674e-05	0.0594407	0.253991	0.998579
cg04604775			Smokers>E-cigs>Never	1.63561e-05	0.0598354	0.794353	0.998579
cg24724664	MAP1D	NM_199227	Smokers>E-cigs>Never	1.64831e-05	0.0598937	0.812088	0.998579
cg21074766			Smokers>E-cigs>Never	1.65714e-05	0.0598937	0.054918	0.998579
cg06679296	TNNT3;TNNT3;TNNT3;TNNT3	NM_001042781;NM_006757;NM_001042780;NM_001042782	Never>E-cigs>Smokers	1.66164e-05	0.0598937	0.00357748	0.773405
cg16090056	CNOT1;CNOT1;CNOT1;CNOT1	NR_049763;NM_016284;NM_001265612;NM_206999	Never>E-cigs>Smokers	1.6835e-05	0.0603858	0.0958926	0.998579
cg09699925	BRE;BRE;BRE;BRE;BRE;BRE	NM_199193;NM_199192;NM_004899;NM_199194;NM_199191;NM_001261840	Never>E-cigs>Smokers	1.72549e-05	0.0615914	0.35389	0.998579
cg07225475	SSH1;MIR619;SSH1	NM_001161330;NR_030350;NM_018984	Never>E-cigs>Smokers	1.75273e-05	0.0619807	0.0288768	0.998579
cg20122875	RHBDL2;RHBDL2	NM_017821;NM_001304746	Smokers>Never>E-cigs	1.75326e-05	0.0619807	0.860052	0.998722
cg12579921	AKR1C3	NM_001253908	Never>E-cigs>Smokers	1.76824e-05	0.0622112	0.544805	0.998579
cg26458452			Smokers>E-cigs>Never	1.80117e-05	0.0630631	0.00900403	0.912531
cg04573260	NTPCR	NM_032324	Smokers>E-cigs>Never	1.81039e-05	0.0630631	0.215633	0.998579
cg25662428	MKNK2;MKNK2	NM_199054;NM_017572	Never>E-cigs>Smokers	1.81818e-05	0.0630631	0.116096	0.998579
cg03844308	FRMD8	NM_031904	Never>E-cigs>Smokers	1.82893e-05	0.0631382	0.583428	0.998579
cg26995378	GLYATL2	NM_145016	Smokers>E-cigs>Never	1.85803e-05	0.0636375	0.0559379	0.998579
cg08497835	EPB41;EPB41;EPB41;EPB41;EPB41;EPB41	NM_001166006;NM_203343;NM_001166005;NM_001166007;NM_004437;NM_203342	Smokers>E-cigs>Never	1.86747e-05	0.0636375	0.695003	0.998579
cg16312723			Never>E-cigs>Smokers	1.87403e-05	0.0636375	0.554056	0.998579
cg07943658	AHRR;AHRR	NM_020731;NM_001242412	Smokers>E-cigs>Never	1.87801e-05	0.0636375	0.78069	0.998579
cg22506676			Never>E-cigs>Smokers	1.9223e-05	0.0648393	0.908657	0.999159
cg10550033			Smokers>E-cigs>Never	1.9424e-05	0.0649651	0.793303	0.998579
cg13204699			Smokers>E-cigs>Never	1.95106e-05	0.0649651	0.124037	0.998579
cg13971793	NQO1;NQO1;NQO1;NQO1	NM_001025434;NM_001025433;NM_000903;NM_001286137	Never>E-cigs>Smokers	1.95253e-05	0.0649651	0.237866	0.998579
cg15281614			Smokers>E-cigs>Never	1.98291e-05	0.0653278	0.457478	0.998579
cg09672383	POMC;POMC	NM_000939;NM_001035256	Smokers>E-cigs>Never	1.98461e-05	0.0653278	0.647499	0.998579
cg06341100	LRP5	NM_002335	Never>E-cigs>Smokers	1.99009e-05	0.0653278	0.487087	0.998579
cg27553926			Smokers>E-cigs>Never	2.01891e-05	0.0656635	0.289023	0.998579
cg01821149	TNNT3;TNNT3;TNNT3;TNNT3	NM_001042781;NM_006757;NM_001042780;NM_001042782	Never>E-cigs>Smokers	2.02481e-05	0.0656635	0.00354567	0.772755
cg04261496	FOXK1	NM_001037165	Smokers>E-cigs>Never	2.02887e-05	0.0656635	0.661551	0.998579
cg26363039	LOC100292680	NR_028415	Never>E-cigs>Smokers	2.03604e-05	0.0656635	0.901331	0.999159
cg21913632	ADARB1;ADARB1;ADARB1;ADARB1;ADARB1;ADARB1;ADARB1	NM_015833;NM_001160230;NM_001112;NR_027674;NR_027672;NM_015834;NR_027673	Smokers>E-cigs>Never	2.04496e-05	0.0656635	0.497009	0.998579
cg23307066			Never>E-cigs>Smokers	2.05768e-05	0.0657847	0.304817	0.998579
cg23791626	PITPNC1;PITPNC1	NM_181671;NM_012417	Smokers>E-cigs>Never	2.13812e-05	0.0680604	0.25253	0.998579
cg26538164			E-cigs>Smokers>Never	2.15233e-05	0.0681043	0.812349	0.998579
cg17804356	NR5A2;NR5A2	NM_205860;NM_003822	Smokers>E-cigs>Never	2.15802e-05	0.0681043	0.203876	0.998579
cg10068417			Smokers>E-cigs>Never	2.17019e-05	0.0681957	0.386337	0.998579
cg27189554			Never>E-cigs>Smokers	2.20745e-05	0.0690714	0.426454	0.998579
cg01090445	TRAIP;TRAIP	NM_005879;NM_005879	Never>E-cigs>Smokers	2.25781e-05	0.0692983	0.124357	0.998579
cg05062676	CYP1B1	NM_000104	Never>E-cigs>Smokers	2.26546e-05	0.0692983	0.905998	0.999159
cg15199181			Smokers>E-cigs>Never	2.26552e-05	0.0692983	0.198139	0.998579
cg09032957	LDLRAD4;LDLRAD4	NM_181482;NM_181481	Smokers>E-cigs>Never	2.26554e-05	0.0692983	0.110063	0.998579
cg19009962	FAM178B;FAM178B;FAM178B	NM_016490;NM_001172667;NM_001122646	Never>E-cigs>Smokers	2.27073e-05	0.0692983	0.793613	0.998579
cg22471129	SEC14L3	NM_174975	Smokers>E-cigs>Never	2.2807e-05	0.0692983	0.410085	0.998579
cg19017108			Smokers>E-cigs>Never	2.30466e-05	0.0692983	0.0435391	0.998579
cg24762861	TTC28	NM_001145418	Smokers>E-cigs>Never	2.31571e-05	0.0692983	0.0167714	0.97432
cg01975495	SERPINE1;SERPINE1	NM_001165413;NM_000602	Smokers>E-cigs>Never	2.3319e-05	0.0692983	0.963461	0.999739
cg00907809	MTF1	NM_005955	Never>E-cigs>Smokers	2.33254e-05	0.0692983	0.890292	0.999033
cg19838098			Smokers>E-cigs>Never	2.34868e-05	0.0692983	0.0260817	0.998579
cg13555283			Smokers>E-cigs>Never	2.34922e-05	0.0692983	0.472983	0.998579
cg20229227			Never>E-cigs>Smokers	2.36454e-05	0.0692983	0.824372	0.998579
cg09168695	E2F3;E2F3	NM_001949;NM_001243076	Smokers>E-cigs>Never	2.3874e-05	0.0692983	0.021369	0.990958
cg12544557	KRT12	NM_000223	E-cigs>Smokers>Never	2.38851e-05	0.0692983	0.0590393	0.998579
cg09255272	TTC33	NM_012382	Smokers>E-cigs>Never	2.39752e-05	0.0692983	0.165771	0.998579
cg04144025	LOC100507557	NR_038246	Never>E-cigs>Smokers	2.40514e-05	0.0692983	0.677052	0.998579
cg22719037	SH2B3	NM_005475	Smokers>E-cigs>Never	2.40923e-05	0.0692983	0.74338	0.998579
cg15446826	MMP24	NM_006690	Never>E-cigs>Smokers	2.41122e-05	0.0692983	0.288878	0.998579
cg19323261			Never>E-cigs>Smokers	2.42327e-05	0.0692983	0.652038	0.998579
cg00487979	MAML3	NM_018717	Never>E-cigs>Smokers	2.45117e-05	0.0692983	0.498554	0.998579
cg19767478	RAP1GAP;RAP1GAP;RAP1GAP	NM_001145658;NM_002885;NM_001145657	Never>E-cigs>Smokers	2.45177e-05	0.0692983	0.261619	0.998579
cg24249615			Smokers>E-cigs>Never	2.45648e-05	0.0692983	4.08417e-06	0.0208553
cg20667913	VPS53;VPS53	NM_001128159;NM_018289	Smokers>E-cigs>Never	2.45974e-05	0.0692983	0.62239	0.998579
cg05079866			Smokers>E-cigs>Never	2.48083e-05	0.0692983	0.16142	0.998579
cg20636559			Never>E-cigs>Smokers	2.49385e-05	0.0692983	0.518715	0.998579
cg09606564	MFAP4	NM_002404	Smokers>E-cigs>Never	2.49606e-05	0.0692983	0.380925	0.998579
cg17488950			Smokers>Never>E-cigs	2.49872e-05	0.0692983	0.146757	0.998579
cg20738274	C1orf116;C1orf116	NM_023938;NM_001083924	Never>E-cigs>Smokers	2.49896e-05	0.0692983	0.82432	0.998579
cg15885139			Smokers>E-cigs>Never	2.50586e-05	0.0692983	0.436378	0.998579
cg26552641			Smokers>E-cigs>Never	2.50686e-05	0.0692983	0.873111	0.998772
cg03208825	VWF	NM_000552	Never>E-cigs>Smokers	2.54025e-05	0.0696504	0.716693	0.998579
cg23904266	SEC31B	NM_015490	Smokers>E-cigs>Never	2.5446e-05	0.0696504	0.346308	0.998579
cg10376026	RPIA	NM_144563	Never>E-cigs>Smokers	2.54801e-05	0.0696504	0.820182	0.998579
cg05614351	CSNK2B	NM_001320	Never>E-cigs>Smokers	2.58901e-05	0.070509	0.855804	0.998722
cg17739501	SEMA6A;SEMA6A	NM_020796;NM_001300780	Smokers>E-cigs>Never	2.59938e-05	0.0705301	0.0893681	0.998579
cg07694247	CDH26	NM_177980	Smokers>E-cigs>Never	2.65268e-05	0.0714785	0.140167	0.998579
cg20910249	AFF4	NM_014423	Never>E-cigs>Smokers	2.66029e-05	0.0714785	0.484316	0.998579
cg22531450			Never>E-cigs>Smokers	2.66349e-05	0.0714785	0.423743	0.998579
cg10766285			Smokers>E-cigs>Never	2.71232e-05	0.0725241	0.950054	0.999548
cg19641636	CAB39L;CAB39L;CAB39L;CAB39L;CAB39L	NM_001287338;NM_001287337;NM_001287339;NM_001079670;NM_030925	Never>E-cigs>Smokers	2.74179e-05	0.0730465	0.271208	0.998579
cg03155301	TEAD1	NM_021961	Never>E-cigs>Smokers	2.76163e-05	0.0730703	0.332853	0.998579
cg06828657			Never>E-cigs>Smokers	2.76256e-05	0.0730703	0.982675	0.999789
cg11896024	MYO10	NM_012334	Never>E-cigs>Smokers	2.82341e-05	0.0744122	0.233147	0.998579
cg15509953	DPH6	NM_080650	Never>E-cigs>Smokers	2.84484e-05	0.0747094	0.180484	0.998579
cg12253651	DLG5	NM_004747	Never>E-cigs>Smokers	2.85677e-05	0.0747557	0.587069	0.998579
cg04347852	LETM1	NM_012318	Never>E-cigs>Smokers	2.88733e-05	0.0751545	0.305927	0.998579
cg22366731			Smokers>E-cigs>Never	2.89246e-05	0.0751545	0.986173	0.999789
cg02650512	RPL23A;SNORD4A;SNORD42A	NM_000984;NR_000010;NR_000014	Never>E-cigs>Smokers	2.91044e-05	0.0753555	0.676352	0.998579
cg22267664	CDH26	NM_177980	Smokers>E-cigs>Never	2.93367e-05	0.0756905	0.289005	0.998579
cg10469297	MACROD1;FLRT1	NM_014067;NM_013280	Smokers>E-cigs>Never	2.96997e-05	0.076359	0.136755	0.998579
cg03964321	TTC39C;TTC39C;TTC39C	NM_153211;NM_001292030;NM_001135993	Never>E-cigs>Smokers	2.99504e-05	0.0767354	0.741142	0.998579
cg20533893	COL19A1	NM_001858	Smokers>E-cigs>Never	3.02172e-05	0.0769451	0.80887	0.998579
cg16082993			Smokers>E-cigs>Never	3.02416e-05	0.0769451	0.159045	0.998579
cg06635832			Smokers>E-cigs>Never	3.07964e-05	0.0779877	0.318423	0.998579
cg07083079	KIRREL3;KIRREL3;KIRREL3	NM_032531;NM_001301097;NM_001161707	Smokers>E-cigs>Never	3.08634e-05	0.0779877	0.41046	0.998579
cg20442941	GFRA4;GFRA4	NM_145762;NM_022139	Smokers>E-cigs>Never	3.10081e-05	0.0780849	0.813205	0.998579
cg19336909			Never>E-cigs>Smokers	3.12267e-05	0.0783669	0.130725	0.998579
cg20004659	ABCC3;ABCC3	NM_001144070;NM_003786	Never>E-cigs>Smokers	3.13619e-05	0.078387	0.279951	0.998579
cg12608433	MAP1D	NM_199227	Smokers>E-cigs>Never	3.14479e-05	0.078387	0.480594	0.998579
cg07551060	GRK5	NM_005308	Never>E-cigs>Smokers	3.17341e-05	0.0786212	0.748936	0.998579
cg16162970	PACS2;PACS2	NM_015197;NM_001100913	Smokers>E-cigs>Never	3.17557e-05	0.0786212	0.488896	0.998579
cg04754304	TTC39C;TTC39C;TTC39C	NM_001292030;NM_153211;NM_001135993	Never>E-cigs>Smokers	3.21087e-05	0.0789488	0.775468	0.998579
cg23601468	SYN3;SYN3;TIMP3;SYN3	NM_133633;NM_003490;NM_000362;NM_001135774	Never>E-cigs>Smokers	3.2175e-05	0.0789488	0.107848	0.998579
cg14979620	TP73;TP73;TP73;TP73	NM_001126240;NM_005427;NM_001126242;NM_001126241	Smokers>E-cigs>Never	3.22639e-05	0.0789488	0.101673	0.998579
cg05209630			Never>E-cigs>Smokers	3.23541e-05	0.0789488	0.493897	0.998579
cg16347833	GIT1;GIT1	NM_001085454;NM_014030	Never>E-cigs>Smokers	3.25584e-05	0.0789488	0.0265326	0.998579
cg01927162	KIAA0922;KIAA0922	NM_015196;NM_001131007	Never>E-cigs>Smokers	3.25623e-05	0.0789488	0.845386	0.998579
cg12910906	ARHGEF4;ARHGEF4	NM_015320;NM_032995	Smokers>E-cigs>Never	3.27609e-05	0.0789488	0.00216603	0.691321
cg23747291	AP2A2;AP2A2	NM_001242837;NM_012305	Never>E-cigs>Smokers	3.28008e-05	0.0789488	0.692696	0.998579
cg00140786	AMZ1	NM_133463	E-cigs>Smokers>Never	3.28543e-05	0.0789488	0.519239	0.998579
cg10236239	SULT1C4;SULT1C4	NM_006588;NM_006588	Smokers>E-cigs>Never	3.31001e-05	0.0791661	0.0827536	0.998579
cg13005086	STK3;STK3;STK3	NM_006281;NM_001256313;NM_001256312	Never>E-cigs>Smokers	3.34012e-05	0.0791661	0.573695	0.998579
cg13782035	LUCAT1;LUCAT1	NR_103548;NR_103549	Never>E-cigs>Smokers	3.34538e-05	0.0791661	0.939616	0.999361
cg25153852	AHDC1	NM_001029882	Never>E-cigs>Smokers	3.3535e-05	0.0791661	0.252127	0.998579
cg18410341			Never>E-cigs>Smokers	3.35647e-05	0.0791661	0.452653	0.998579
cg07732969	NCKAP5;NCKAP5	NM_207363;NM_207481	Smokers>E-cigs>Never	3.35907e-05	0.0791661	0.0520395	0.998579
cg25475538	SORBS3	NM_005775	Never>E-cigs>Smokers	3.37454e-05	0.0792428	0.651307	0.998579
cg11841894	CDK5RAP2;CDK5RAP2;CDK5RAP2;CDK5RAP2;CDK5RAP2;CDK5RAP2;CDK5RAP2;CDK5RAP2	NR_073554;NR_073556;NR_073558;NR_073557;NR_073555;NM_001272039;NM_018249;NM_001011649	Never>E-cigs>Smokers	3.38388e-05	0.0792428	0.706494	0.998579
cg22511970			Smokers>E-cigs>Never	3.40082e-05	0.0793867	0.671059	0.998579
cg20637609			Smokers>E-cigs>Never	3.41256e-05	0.0794086	0.0264256	0.998579
cg02298472	WNT5A	NM_003392	Never>E-cigs>Smokers	3.43591e-05	0.0796997	0.687016	0.998579
cg11183875			Never>E-cigs>Smokers	3.47177e-05	0.0802784	0.146705	0.998579
cg18150909	DLEU1	NR_109974	Smokers>E-cigs>Never	3.49325e-05	0.0803786	0.809445	0.998579
cg03801691	VGLL4;VGLL4;VGLL4;VGLL4	NM_014667;NM_001128220;NM_001128219;NM_001128221	Never>E-cigs>Smokers	3.49797e-05	0.0803786	0.0890972	0.998579
cg07383415	FAM49A	NM_030797	Smokers>E-cigs>Never	3.52951e-05	0.0808508	0.0198974	0.984527
cg06564388	HAND1	NM_004821	Smokers>E-cigs>Never	3.59088e-05	0.0820011	0.0217148	0.992451
cg27506503	KIAA1549L	NM_012194	Never>E-cigs>Smokers	3.69829e-05	0.0841925	0.607974	0.998579
cg14512813			Smokers>E-cigs>Never	3.71189e-05	0.0842412	0.519163	0.998579
cg08305460	VWA9;VWA9;VWA9;VWA9;VWA9;SLC24A1	NM_001207059;NM_001207058;NM_001136043;NR_045901;NR_045104;NM_001301033	Never>E-cigs>Smokers	3.77628e-05	0.0854388	0.676098	0.998579
cg00746386			Smokers>E-cigs>Never	3.8137e-05	0.085749	0.979345	0.999789
cg09180171			Smokers>E-cigs>Never	3.82511e-05	0.085749	0.950553	0.999585
cg10438221			Smokers>E-cigs>Never	3.82886e-05	0.085749	0.743694	0.998579
cg27116114			Never>E-cigs>Smokers	3.83663e-05	0.085749	0.716652	0.998579
cg13045370	PXDN	NM_012293	Never>E-cigs>Smokers	3.88799e-05	0.0861066	0.815577	0.998579
cg09038956	CDHR1;CDHR1	NM_033100;NM_001171971	Smokers>E-cigs>Never	3.88942e-05	0.0861066	0.709898	0.998579
cg21541080			Smokers>E-cigs>Never	3.89533e-05	0.0861066	0.0883944	0.998579
cg05787287	SLC22A20;SLC22A20	NM_001004326;NR_033396	Smokers>E-cigs>Never	3.89966e-05	0.0861066	0.00312411	0.748397
cg11203135	CAMTA1	NM_015215	Smokers>E-cigs>Never	3.91118e-05	0.0861066	0.0614266	0.998579
cg20748132			Smokers>E-cigs>Never	3.92365e-05	0.0861233	0.439069	0.998579
cg15155859	FRMD4A	NM_018027	Smokers>E-cigs>Never	3.96167e-05	0.086699	0.00280987	0.734197
cg24766555	RAB3B	NM_002867	Never>E-cigs>Smokers	4.00198e-05	0.0872613	0.141238	0.998579
cg07822010	SLC22A20;SLC22A20	NM_001004326;NR_033396	Smokers>E-cigs>Never	4.02911e-05	0.0872613	0.287774	0.998579
cg03010887			Smokers>E-cigs>Never	4.03548e-05	0.0872613	0.097117	0.998579
cg20943461	TMC8;TMC6;TMC8	NM_152468;NM_007267;NM_152468	Smokers>E-cigs>Never	4.03809e-05	0.0872613	0.300104	0.998579
cg10073338	ATAD1	NM_032810	Never>E-cigs>Smokers	4.0467e-05	0.0872613	0.315776	0.998579
cg24885596			Never>E-cigs>Smokers	4.06033e-05	0.0872991	0.682668	0.998579
cg15890609	OGFRL1	NM_024576	Smokers>E-cigs>Never	4.07735e-05	0.0874095	0.118838	0.998579
cg03099014			Never>E-cigs>Smokers	4.09463e-05	0.0875248	0.048042	0.998579
cg08610773			E-cigs>Never>Smokers	4.12193e-05	0.087853	0.0207156	0.986565
cg09742918			Smokers>E-cigs>Never	4.15304e-05	0.088194	0.492617	0.998579
cg15555014	SYNGR2	NM_004710	Never>E-cigs>Smokers	4.16493e-05	0.088194	0.0595302	0.998579
cg20577165	NOX5;NOX5;NOX5;NOX5;NOX5;MIR548H4	NR_033671;NR_033672;NM_001184780;NM_024505;NM_001184779;NR_031680	E-cigs>Smokers>Never	4.17574e-05	0.088194	0.3797	0.998579
cg09550697	PLEC1;PLEC1;PLEC1;PLEC1;PLEC1;PLEC1;PLEC1;PLEC1	NM_201378;NM_201384;NM_201382;NM_201381;NM_000445;NM_201380;NM_201383;NM_201379	Never>E-cigs>Smokers	4.18591e-05	0.088194	0.599476	0.998579
cg13874049	TTC16	NM_144965	Smokers>Never>E-cigs	4.23726e-05	0.0890109	0.342589	0.998579
cg04354271	LMTK3	NM_001080434	Smokers>E-cigs>Never	4.24889e-05	0.0890109	0.396352	0.998579
cg02062018	AAK1	NM_014911	Smokers>E-cigs>Never	4.26484e-05	0.0890912	0.300923	0.998579
cg10083898			Smokers>E-cigs>Never	4.33564e-05	0.0903136	0.0206141	0.985939
cg25906315	SPSB1	NM_025106	Never>E-cigs>Smokers	4.36071e-05	0.0905792	0.92167	0.999194
cg06127316	WEE1;WEE1	NM_001143976;NM_003390	Never>E-cigs>Smokers	4.38351e-05	0.0907962	0.93133	0.999281
cg13491003	TUBD1;TUBD1;TUBD1;TUBD1;TUBD1;TUBD1	NM_001193613;NM_001193612;NM_001193611;NM_016261;NM_001193609;NM_001193610	Smokers>E-cigs>Never	4.40375e-05	0.0909593	0.935089	0.999335
cg21081352	C9orf3;C9orf3;C9orf3	NM_001193331;NM_032823;NM_001193329	Never>E-cigs>Smokers	4.41661e-05	0.0909694	0.165385	0.998579
cg21612138	VANGL1;VANGL1;VANGL1	NM_001172412;NM_001172411;NM_138959	Never>E-cigs>Smokers	4.45825e-05	0.0915706	0.88741	0.99887
cg26751511			Smokers>E-cigs>Never	4.48136e-05	0.0916074	0.776916	0.998579
cg21453420			Smokers>E-cigs>Never	4.48496e-05	0.0916074	0.448728	0.998579
cg12545852	LGALS7B	NM_001042507	Never>E-cigs>Smokers	4.50618e-05	0.0917779	0.934755	0.999326
cg20175390			Smokers>E-cigs>Never	4.52002e-05	0.0917779	0.0775324	0.998579
cg18716255	EPHA10	NM_001099439	Never>E-cigs>Smokers	4.53885e-05	0.0917779	0.628738	0.998579
cg04860338			Never>E-cigs>Smokers	4.54323e-05	0.0917779	0.854481	0.998718
cg11143674			Smokers>E-cigs>Never	4.57784e-05	0.0922175	0.070798	0.998579
cg24113968			Never>E-cigs>Smokers	4.59008e-05	0.0922175	0.0304526	0.998579
cg08010362			Smokers>E-cigs>Never	4.60543e-05	0.0922739	0.450058	0.998579
cg14492337	P4HB	NM_000918	Never>E-cigs>Smokers	4.64624e-05	0.0928386	0.259718	0.998579
cg26681772	RAB26;RAB26	NM_001308053;NM_014353	Smokers>E-cigs>Never	4.66832e-05	0.093027	0.385663	0.998579
cg08827346	PRR5L;PRR5L;PRR5L;PRR5L	NM_001160168;NM_001160167;NM_024841;NM_001160169	Never>E-cigs>Smokers	4.70308e-05	0.0932234	0.549607	0.998579
cg19736179			Never>E-cigs>Smokers	4.70486e-05	0.0932234	0.76716	0.998579
cg13390867			Smokers>E-cigs>Never	4.73193e-05	0.0932234	0.0664296	0.998579
cg01078772	KIF3B	NM_004798	Never>E-cigs>Smokers	4.73935e-05	0.0932234	0.676617	0.998579
ch.15.65986670F			Never>E-cigs>Smokers	4.74186e-05	0.0932234	0.0668117	0.998579
cg13922310	DGKA;DGKA;DGKA;DGKA;DGKA;DGKA;DGKA;DGKA	NM_201445;NM_201444;NM_201554;NM_001345;NM_201445;NM_201444;NM_201554;NM_001345	Never>E-cigs>Smokers	4.76106e-05	0.0932234	0.492417	0.998579
cg08220966	MMRN2;SNCG;MMRN2	NM_024756;NM_003087;NM_024756	Smokers>E-cigs>Never	4.78609e-05	0.0932234	0.339341	0.998579
cg21818274			Never>E-cigs>Smokers	4.79799e-05	0.0932234	0.110581	0.998579
cg01718920			Smokers>E-cigs>Never	4.80448e-05	0.0932234	0.0513351	0.998579
cg00584422	ERN2;ERN2	NM_033266;NM_033266	Smokers>E-cigs>Never	4.80496e-05	0.0932234	0.349469	0.998579
cg10193193	NT5DC3	NM_001031701	Smokers>E-cigs>Never	4.86011e-05	0.0937399	0.298799	0.998579
cg19823186	MACROD1	NM_014067	Smokers>E-cigs>Never	4.86105e-05	0.0937399	0.364613	0.998579
cg03596167	ERN2	NM_033266	Smokers>E-cigs>Never	4.86982e-05	0.0937399	0.939743	0.999361
cg25516822	ZNF815	NR_023382	Smokers>Never>E-cigs	4.88452e-05	0.0937774	0.226391	0.998579
cg06325429	PPFIBP2	NM_003621	Smokers>E-cigs>Never	4.89762e-05	0.0937838	0.376321	0.998579
cg02425595	A2LD1	NM_033110	Smokers>E-cigs>Never	4.92586e-05	0.0937932	0.34036	0.998579
cg27097762			Never>E-cigs>Smokers	4.94335e-05	0.0937932	0.170528	0.998579
cg13022461	NCAPH2;NCAPH2	NM_152299;NM_014551	Never>E-cigs>Smokers	4.96074e-05	0.0937932	0.426722	0.998579
cg11553560	REV3L;REV3L;REV3L	NM_002912;NM_001286431;NM_001286432	Smokers>E-cigs>Never	4.98534e-05	0.0937932	0.109848	0.998579
cg16623980	LOC387810	NR_104155	Smokers>E-cigs>Never	4.99672e-05	0.0937932	0.514084	0.998579
cg01970407	AHRR	NM_020731	Smokers>E-cigs>Never	5.00075e-05	0.0937932	0.125856	0.998579
cg11921829	FCRL2;FCRL2;FCRL2	NM_030764;NM_001159488;NR_125358	Smokers>E-cigs>Never	5.02034e-05	0.0937932	0.065974	0.998579
cg14787753	STK39	NM_013233	Never>E-cigs>Smokers	5.04763e-05	0.0937932	0.211463	0.998579
cg04522045			Smokers>E-cigs>Never	5.05266e-05	0.0937932	0.0243279	0.998579
cg19908768	SULT1C4	NM_006588	Smokers>E-cigs>Never	5.06209e-05	0.0937932	0.0228709	0.994046
cg13526326	WNT6	NM_006522	Smokers>E-cigs>Never	5.09145e-05	0.0937932	0.0545959	0.998579
cg01301798	GNG12	NM_018841	Never>E-cigs>Smokers	5.10497e-05	0.0937932	0.182135	0.998579
cg01584760	CYP1B1	NM_000104	Never>E-cigs>Smokers	5.1059e-05	0.0937932	0.240408	0.998579
cg22381395			Smokers>E-cigs>Never	5.10944e-05	0.0937932	0.194713	0.998579
cg07318627	FAM38A	NM_001142864	Smokers>E-cigs>Never	5.1421e-05	0.0937932	0.713359	0.998579
cg16235582	ODZ4	NM_001098816	Smokers>E-cigs>Never	5.14498e-05	0.0937932	0.625472	0.998579
cg12253065	UBQLN4;UBQLN4	NM_001304342;NM_020131	Never>E-cigs>Smokers	5.15694e-05	0.0937932	0.595924	0.998579
cg02062384	RAP1GAP2;RAP1GAP2	NM_001100398;NM_015085	Smokers>E-cigs>Never	5.16466e-05	0.0937932	0.229701	0.998579
cg20529344			Smokers>E-cigs>Never	5.18131e-05	0.0937932	0.87101	0.998772
cg16671375			Never>E-cigs>Smokers	5.18577e-05	0.0937932	0.646758	0.998579
cg13580382	ANAPC2	NM_013366	Never>E-cigs>Smokers	5.19269e-05	0.0937932	0.424197	0.998579
cg00473639	KIRREL3;KIRREL3	NM_001161707;NM_032531	Smokers>E-cigs>Never	5.19461e-05	0.0937932	0.219736	0.998579
cg16486690	TCF7L1	NM_031283	Smokers>E-cigs>Never	5.19672e-05	0.0937932	0.941644	0.999361
cg20276769	CDH1	NM_004360	Never>E-cigs>Smokers	5.20424e-05	0.0937932	0.602166	0.998579
cg26590199			Smokers>E-cigs>Never	5.23166e-05	0.0939393	0.0404139	0.998579
cg26941722			Never>E-cigs>Smokers	5.2515e-05	0.0939393	0.531076	0.998579
cg09250656	MTCL1	NM_015210	Never>E-cigs>Smokers	5.2797e-05	0.0939393	0.938623	0.999361
cg08234618	TF	NM_001063	Smokers>E-cigs>Never	5.28999e-05	0.0939393	0.553554	0.998579
cg09649610	GNG4;GNG4;GNG4;GNG4;GNG4	NM_001098722;NM_004485;NM_004485;NM_001098721;NM_001098721	Smokers>E-cigs>Never	5.29074e-05	0.0939393	0.00657828	0.879241
cg06494199	LPO;LPO;LPO;LPO;LPO	NM_001160102;NM_006151;NR_027647;NM_001160102;NM_006151	Smokers>E-cigs>Never	5.29734e-05	0.0939393	0.184353	0.998579
cg03544309	TMCC3	NM_020698	Never>E-cigs>Smokers	5.30177e-05	0.0939393	0.836223	0.998579
cg09524946			Smokers>E-cigs>Never	5.32739e-05	0.0941663	0.776215	0.998579
cg16167052	PNMAL2;PNMAL2	NM_020709;NM_020709	Smokers>E-cigs>Never	5.36905e-05	0.0946752	0.0580373	0.998579
cg14985741	TNFRSF19	NM_148957	Never>E-cigs>Smokers	5.41634e-05	0.0952806	0.392641	0.998579
cg12317456	MMP2	NM_004530	Smokers>E-cigs>Never	5.43954e-05	0.0954604	0.00477649	0.825438
cg01236063			Smokers>E-cigs>Never	5.48756e-05	0.0960472	0.94289	0.999361
cg02939263	CORO2B	NM_006091	Smokers>E-cigs>Never	5.49911e-05	0.0960472	0.606282	0.998579
cg08504062	LOC101929710	NR_130776	Smokers>E-cigs>Never	5.52051e-05	0.0961592	0.140283	0.998579
cg16519487			Smokers>E-cigs>Never	5.53167e-05	0.0961592	0.145101	0.998579
cg13640737	ZNF827;ZNF827	NM_001306215;NM_178835	Never>E-cigs>Smokers	5.57467e-05	0.0966781	0.639031	0.998579
cg19409092			Smokers>E-cigs>Never	5.60109e-05	0.0969077	0.668235	0.998579
cg26646686	BMPR1B;BMPR1B;BMPR1B;BMPR1B;BMPR1B	NM_001256794;NM_001256794;NM_001203;NM_001256792;NM_001256793	Never>E-cigs>Smokers	5.65726e-05	0.0975169	0.381851	0.998579
cg06312401			E-cigs>Smokers>Never	5.66282e-05	0.0975169	0.167275	0.998579
cg17248487	AHRR	NM_020731	Never>E-cigs>Smokers	5.71005e-05	0.0978021	0.082527	0.998579
cg12500690	NDUFC1;NDUFC1;NDUFC1;NDUFC1;NDUFC1;NDUFC1;NDUFC1;NAA15;NDUFC1;NDUFC1	NM_001184991;NM_001184986;NM_002494;NM_001184989;NM_001184990;NM_001184988;NM_001184987	Never>E-cigs>Smokers	5.71009e-05	0.0978021	0.410324	0.998579
cg02561912	NFATC2;NFATC2;NFATC2	NM_001136021;NM_173091;NM_012340	Smokers>E-cigs>Never	5.71929e-05	0.0978021	0.681577	0.998579
cg07808881	FOXN3	NM_001085471	Never>E-cigs>Smokers	5.77142e-05	0.0982685	0.648711	0.998579
cg16651877	BTBD19	NM_001136537	Smokers>E-cigs>Never	5.78134e-05	0.0982685	0.348446	0.998579
cg15716241	RABL6;RABL6;RABL6	NM_001173989;NM_024718;NM_001173988	Smokers>E-cigs>Never	5.79124e-05	0.0982685	0.549795	0.998579
cg14324980	RUNX1;RUNX1;RUNX1	NM_001122607;NM_001001890;NM_001754	Smokers>E-cigs>Never	5.80242e-05	0.0982685	0.708331	0.998579
cg11600606			Smokers>E-cigs>Never	5.81339e-05	0.0982685	0.788726	0.998579
cg25745729			Smokers>E-cigs>Never	5.85537e-05	0.0987512	0.234544	0.998579
cg07292413			Smokers>E-cigs>Never	5.90736e-05	0.0990711	0.258413	0.998579
cg08932440	NKX1-2	NM_001146340	Smokers>E-cigs>Never	5.9148e-05	0.0990711	0.0105627	0.926274
cg15874661			Smokers>E-cigs>Never	5.92248e-05	0.0990711	0.691518	0.998579
cg02324676	PRKAG2;PRKAG2;PRKAG2;PRKAG2;PRKAG2	NM_024429;NM_001304531;NM_001304527;NM_001040633;NM_016203	Never>E-cigs>Smokers	5.94978e-05	0.0990711	0.54177	0.998579
cg11223899	PRRX2	NM_016307	Smokers>E-cigs>Never	5.96581e-05	0.0990711	0.748317	0.998579
cg21219570	PLEKHA5;PLEKHA5;PLEKHA5;PLEKHA5	NM_001143821;NM_019012;NM_001256470;NM_001256787	Smokers>E-cigs>Never	5.97325e-05	0.0990711	0.017172	0.976491
cg20836388	ZC3HC1;ZC3HC1;ZC3HC1	NM_001282191;NM_001282190;NM_016478	Never>E-cigs>Smokers	5.99005e-05	0.0990711	0.973835	0.999744
cg16051718	KIAA0232;KIAA0232	NM_014743;NM_001100590	Never>E-cigs>Smokers	5.99538e-05	0.0990711	0.322688	0.998579
cg08628635	E2F3	NM_001949	Smokers>E-cigs>Never	5.9956e-05	0.0990711	0.668303	0.998579
cg00120332			Never>E-cigs>Smokers	6.0176e-05	0.0992117	0.593869	0.998579
cg05758866			Never>E-cigs>Smokers	6.04991e-05	0.0995212	0.843515	0.998579
cg25580396	MAPKAP1;MAPKAP1;MAPKAP1;MAPKAP1;MAPKAP1	NM_001006621;NM_001006620;NM_024117;NM_001006619;NM_001006617	Smokers>E-cigs>Never	6.07694e-05	0.0996857	0.11276	0.998579
cg08943494	PRR5L;PRR5L;PRR5L;PRR5L;PRR5L	NM_024841;NM_001160167;NM_001160169;NM_001160169;NM_001160168	Smokers>E-cigs>Never	6.08702e-05	0.0996857	0.0269884	0.998579
cg06580045			Never>E-cigs>Smokers	6.11308e-05	0.0998901	0.799495	0.998579
cg17529735			Smokers>E-cigs>Never	6.12879e-05	0.0999248	0.13626	0.998579
